# Supplementary material for: Continuous Readout versus Titer-Based Assays of Influenza Vaccine Trials: Sensitivity, Specificity, and False Discovery Rates
Source: Comput Math Methods Med. 2019 May 8;2019:9287120. doi: 10.1155/2019/9287120 (PMC6530215; doi:10.1155/2019/9287120)
Supplement: Supplementary 2 — S2 data: actual HAI, MN, and mPLEX-Flu experimental data. [file 9287120.f2.csv]

Participant ID	Cohort Dose	Cohort	Sequencenum	Visit	Protocol	Segment	Stratum	Dose	Test Name	Visit Label	Collection Date	Titer	Fold Rise	Seropositive	Seroconversion	method	virus	logTiter	H5_A_Ind05__28_	A_Ind05__28_	Gender	Dose__mcg_	Age_at_Enrollment	Ethnicity	White	time	batch
47FUR001	Primed15	Primed (A)	1	1 (Day 0)	80059	Previously Vaccinated	PriorDoseLow	15	Hemagglutinin inhibition - A/Indonesia/05/2005 Antigen	PREVAC	19OCT2010	5	.	0	.	Hemagglutinin inhibition	A/Indonesia/05/2005 Antigen	1.6094379124341	11.2306507463934	75406.65	Female	15	60	Non-Hispanic or Non-Latino	Yes	01	1
47FUR001	Primed15	Primed (A)	1	1 (Day 0)	80059	Previously Vaccinated	PriorDoseLow	15	Hemagglutinin inhibition - A/Indonesia/05/2005 Antigen	PREVAC	19OCT2010	5	.	0	.	Hemagglutinin inhibition	A/Indonesia/05/2005 Antigen	1.6094379124341	11.4887605306331	97612.47	Female	15	60	Non-Hispanic or Non-Latino	Yes	01	1
47FUR001	Primed15	Primed (A)	2	2 (Day 3)	80059	Previously Vaccinated	PriorDoseLow	15	Hemagglutinin inhibition - A/Indonesia/05/2005 Antigen	DAY3	21OCT2010	5	1	0	0	Hemagglutinin inhibition	A/Indonesia/05/2005 Antigen	1.6094379124341	11.3855416514849	88039.57	Female	15	60	Non-Hispanic or Non-Latino	Yes	02	1
47FUR001	Primed15	Primed (A)	2	2 (Day 3)	80059	Previously Vaccinated	PriorDoseLow	15	Hemagglutinin inhibition - A/Indonesia/05/2005 Antigen	DAY3	21OCT2010	5	1	0	0	Hemagglutinin inhibition	A/Indonesia/05/2005 Antigen	1.6094379124341	11.2710684030568	78516.84	Female	15	60	Non-Hispanic or Non-Latino	Yes	02	1
47FUR001	Primed15	Primed (A)	3	3 (Day 7)	80059	Previously Vaccinated	PriorDoseLow	15	Hemagglutinin inhibition - A/Indonesia/05/2005 Antigen	DAY7	26OCT2010	5	1	0	0	Hemagglutinin inhibition	A/Indonesia/05/2005 Antigen	1.6094379124341	12.4976207352973	267699.6	Female	15	60	Non-Hispanic or Non-Latino	Yes	03	1
47FUR001	Primed15	Primed (A)	3	3 (Day 7)	80059	Previously Vaccinated	PriorDoseLow	15	Hemagglutinin inhibition - A/Indonesia/05/2005 Antigen	DAY7	26OCT2010	5	1	0	0	Hemagglutinin inhibition	A/Indonesia/05/2005 Antigen	1.6094379124341	12.6187449856997	302169.98	Female	15	60	Non-Hispanic or Non-Latino	Yes	03	1
47FUR001	Primed15	Primed (A)	4	4 (Day 14)	80059	Previously Vaccinated	PriorDoseLow	15	Hemagglutinin inhibition - A/Indonesia/05/2005 Antigen	DAY14	01NOV2010	28.28427125	5.65685425	0	0	Hemagglutinin inhibition	A/Indonesia/05/2005 Antigen	3.34230586392369	12.3035106961743	220468.63	Female	15	60	Non-Hispanic or Non-Latino	Yes	04	1
47FUR001	Primed15	Primed (A)	4	4 (Day 14)	80059	Previously Vaccinated	PriorDoseLow	15	Hemagglutinin inhibition - A/Indonesia/05/2005 Antigen	DAY14	01NOV2010	28.28427125	5.65685425	0	0	Hemagglutinin inhibition	A/Indonesia/05/2005 Antigen	3.34230586392369	12.4878469640177	265095.91	Female	15	60	Non-Hispanic or Non-Latino	Yes	04	1
47FUR001	Primed15	Primed (A)	9	9 (Day 56)	80059	Previously Vaccinated	PriorDoseLow	15	Hemagglutinin inhibition - A/Indonesia/05/2005 Antigen	DAY56	13DEC2010	25.198421	5.0396842	0	0	Hemagglutinin inhibition	A/Indonesia/05/2005 Antigen	3.22678133382407	12.0152116714761	165249.49	Female	15	60	Non-Hispanic or Non-Latino	Yes	09	1
47FUR001	Primed15	Primed (A)	9	9 (Day 56)	80059	Previously Vaccinated	PriorDoseLow	15	Hemagglutinin inhibition - A/Indonesia/05/2005 Antigen	DAY56	13DEC2010	25.198421	5.0396842	0	0	Hemagglutinin inhibition	A/Indonesia/05/2005 Antigen	3.22678133382407	11.8953150356502	146578.3	Female	15	60	Non-Hispanic or Non-Latino	Yes	09	1
47FUR001	Primed15	Primed (A)	10	10 (Day 180 or 208)	80059	Previously Vaccinated	PriorDoseLow	15	Hemagglutinin inhibition - A/Indonesia/05/2005 Antigen	DAY180	21APR2011	7.071067812	1.414213562	0	0	Hemagglutinin inhibition	A/Indonesia/05/2005 Antigen	1.95601150273309	11.5014919507441	98863.16	Female	15	60	Non-Hispanic or Non-Latino	Yes	10	1
47FUR001	Primed15	Primed (A)	10	10 (Day 180 or 208)	80059	Previously Vaccinated	PriorDoseLow	15	Hemagglutinin inhibition - A/Indonesia/05/2005 Antigen	DAY180	21APR2011	7.071067812	1.414213562	0	0	Hemagglutinin inhibition	A/Indonesia/05/2005 Antigen	1.95601150273309	11.6786731813211	118027.53	Female	15	60	Non-Hispanic or Non-Latino	Yes	10	1
47FUR003	Primed15	Primed (A)	1	1 (Day 0)	80059	Previously Vaccinated	PriorDoseHigh	15	Hemagglutinin inhibition - A/Indonesia/05/2005 Antigen	PREVAC	21OCT2010	5	.	0	.	Hemagglutinin inhibition	A/Indonesia/05/2005 Antigen	1.6094379124341	11.2644809004024	78001.31	Male	15	44	Non-Hispanic or Non-Latino	Yes	01	5
47FUR003	Primed15	Primed (A)	1	1 (Day 0)	80059	Previously Vaccinated	PriorDoseHigh	15	Hemagglutinin inhibition - A/Indonesia/05/2005 Antigen	PREVAC	21OCT2010	5	.	0	.	Hemagglutinin inhibition	A/Indonesia/05/2005 Antigen	1.6094379124341	11.9308387059176	151878.89	Male	15	44	Non-Hispanic or Non-Latino	Yes	01	5
47FUR003	Primed15	Primed (A)	2	2 (Day 3)	80059	Previously Vaccinated	PriorDoseHigh	15	Hemagglutinin inhibition - A/Indonesia/05/2005 Antigen	DAY3	25OCT2010	5	1	0	0	Hemagglutinin inhibition	A/Indonesia/05/2005 Antigen	1.6094379124341	.	.	Male	15	44	Non-Hispanic or Non-Latino	Yes	02	5
47FUR003	Primed15	Primed (A)	2	2 (Day 3)	80059	Previously Vaccinated	PriorDoseHigh	15	Hemagglutinin inhibition - A/Indonesia/05/2005 Antigen	DAY3	25OCT2010	5	1	0	0	Hemagglutinin inhibition	A/Indonesia/05/2005 Antigen	1.6094379124341	10.9209064161537	55320.92	Male	15	44	Non-Hispanic or Non-Latino	Yes	02	5
47FUR003	Primed15	Primed (A)	3	3 (Day 7)	80059	Previously Vaccinated	PriorDoseHigh	15	Hemagglutinin inhibition - A/Indonesia/05/2005 Antigen	DAY7	28OCT2010	7.071067812	1.414213562	0	0	Hemagglutinin inhibition	A/Indonesia/05/2005 Antigen	1.95601150273309	12.6865908647218	323382.42	Male	15	44	Non-Hispanic or Non-Latino	Yes	03	5
47FUR003	Primed15	Primed (A)	3	3 (Day 7)	80059	Previously Vaccinated	PriorDoseHigh	15	Hemagglutinin inhibition - A/Indonesia/05/2005 Antigen	DAY7	28OCT2010	7.071067812	1.414213562	0	0	Hemagglutinin inhibition	A/Indonesia/05/2005 Antigen	1.95601150273309	11.8549462797218	140778.96	Male	15	44	Non-Hispanic or Non-Latino	Yes	03	5
47FUR003	Primed15	Primed (A)	4	4 (Day 14)	80059	Previously Vaccinated	PriorDoseHigh	15	Hemagglutinin inhibition - A/Indonesia/05/2005 Antigen	DAY14	03NOV2010	56.5685425	11.3137085	1	1	Hemagglutinin inhibition	A/Indonesia/05/2005 Antigen	4.03545304448364	13.7150398233729	904411.58	Male	15	44	Non-Hispanic or Non-Latino	Yes	04	5
47FUR003	Primed15	Primed (A)	4	4 (Day 14)	80059	Previously Vaccinated	PriorDoseHigh	15	Hemagglutinin inhibition - A/Indonesia/05/2005 Antigen	DAY14	03NOV2010	56.5685425	11.3137085	1	1	Hemagglutinin inhibition	A/Indonesia/05/2005 Antigen	4.03545304448364	12.9271187320482	411316.69	Male	15	44	Non-Hispanic or Non-Latino	Yes	04	5
47FUR003	Primed15	Primed (A)	9	9 (Day 56)	80059	Previously Vaccinated	PriorDoseHigh	15	Hemagglutinin inhibition - A/Indonesia/05/2005 Antigen	DAY56	16DEC2010	80	16	1	1	Hemagglutinin inhibition	A/Indonesia/05/2005 Antigen	4.38202663467388	13.578600253262	789062.06	Male	15	44	Non-Hispanic or Non-Latino	Yes	09	5
47FUR003	Primed15	Primed (A)	9	9 (Day 56)	80059	Previously Vaccinated	PriorDoseHigh	15	Hemagglutinin inhibition - A/Indonesia/05/2005 Antigen	DAY56	16DEC2010	80	16	1	1	Hemagglutinin inhibition	A/Indonesia/05/2005 Antigen	4.38202663467388	13.6654535957625	860658.95	Male	15	44	Non-Hispanic or Non-Latino	Yes	09	5
47FUR003	Primed15	Primed (A)	10	10 (Day 180 or 208)	80059	Previously Vaccinated	PriorDoseHigh	15	Hemagglutinin inhibition - A/Indonesia/05/2005 Antigen	DAY180	20APR2011	20	4	0	0	Hemagglutinin inhibition	A/Indonesia/05/2005 Antigen	2.99573227355399	13.0106875397916	447167.06	Male	15	44	Non-Hispanic or Non-Latino	Yes	10	5
47FUR003	Primed15	Primed (A)	10	10 (Day 180 or 208)	80059	Previously Vaccinated	PriorDoseHigh	15	Hemagglutinin inhibition - A/Indonesia/05/2005 Antigen	DAY180	20APR2011	20	4	0	0	Hemagglutinin inhibition	A/Indonesia/05/2005 Antigen	2.99573227355399	12.9372728144488	415514.51	Male	15	44	Non-Hispanic or Non-Latino	Yes	10	5
47FUR004	Primed15	Primed (A)	1	1 (Day 0)	80059	Previously Vaccinated	PriorDoseHigh	15	Hemagglutinin inhibition - A/Indonesia/05/2005 Antigen	PREVAC	21OCT2010	14.14213562	.	0	.	Hemagglutinin inhibition	A/Indonesia/05/2005 Antigen	2.6491586830102	10.5695969853245	38932.98	Male	15	59	Non-Hispanic or Non-Latino	Yes	01	3
47FUR004	Primed15	Primed (A)	1	1 (Day 0)	80059	Previously Vaccinated	PriorDoseHigh	15	Hemagglutinin inhibition - A/Indonesia/05/2005 Antigen	PREVAC	21OCT2010	14.14213562	.	0	.	Hemagglutinin inhibition	A/Indonesia/05/2005 Antigen	2.6491586830102	11.0203694312539	61106.25	Male	15	59	Non-Hispanic or Non-Latino	Yes	01	3
47FUR004	Primed15	Primed (A)	2	2 (Day 3)	80059	Previously Vaccinated	PriorDoseHigh	15	Hemagglutinin inhibition - A/Indonesia/05/2005 Antigen	DAY3	25OCT2010	20	1.414213562	0	0	Hemagglutinin inhibition	A/Indonesia/05/2005 Antigen	2.99573227355399	10.3267644185856	30539.14	Male	15	59	Non-Hispanic or Non-Latino	Yes	02	3
47FUR004	Primed15	Primed (A)	2	2 (Day 3)	80059	Previously Vaccinated	PriorDoseHigh	15	Hemagglutinin inhibition - A/Indonesia/05/2005 Antigen	DAY3	25OCT2010	20	1.414213562	0	0	Hemagglutinin inhibition	A/Indonesia/05/2005 Antigen	2.99573227355399	10.8194832408892	49985.25	Male	15	59	Non-Hispanic or Non-Latino	Yes	02	3
47FUR004	Primed15	Primed (A)	3	3 (Day 7)	80059	Previously Vaccinated	PriorDoseHigh	15	Hemagglutinin inhibition - A/Indonesia/05/2005 Antigen	DAY7	28OCT2010	20	1.414213562	0	0	Hemagglutinin inhibition	A/Indonesia/05/2005 Antigen	2.99573227355399	11.3883633280425	88288.34	Male	15	59	Non-Hispanic or Non-Latino	Yes	03	3
47FUR004	Primed15	Primed (A)	3	3 (Day 7)	80059	Previously Vaccinated	PriorDoseHigh	15	Hemagglutinin inhibition - A/Indonesia/05/2005 Antigen	DAY7	28OCT2010	20	1.414213562	0	0	Hemagglutinin inhibition	A/Indonesia/05/2005 Antigen	2.99573227355399	10.8880692562899	53533.84	Male	15	59	Non-Hispanic or Non-Latino	Yes	03	3
47FUR004	Primed15	Primed (A)	4	4 (Day 14)	80059	Previously Vaccinated	PriorDoseHigh	15	Hemagglutinin inhibition - A/Indonesia/05/2005 Antigen	DAY14	05NOV2010	40	2.828427125	1	0	Hemagglutinin inhibition	A/Indonesia/05/2005 Antigen	3.68887945411393	10.9937430200398	59500.68	Male	15	59	Non-Hispanic or Non-Latino	Yes	04	3
47FUR004	Primed15	Primed (A)	4	4 (Day 14)	80059	Previously Vaccinated	PriorDoseHigh	15	Hemagglutinin inhibition - A/Indonesia/05/2005 Antigen	DAY14	05NOV2010	40	2.828427125	1	0	Hemagglutinin inhibition	A/Indonesia/05/2005 Antigen	3.68887945411393	11.4004427577228	89361.28	Male	15	59	Non-Hispanic or Non-Latino	Yes	04	3
47FUR004	Primed15	Primed (A)	5	5 (Day 28)	80059	Previously Vaccinated	PriorDoseHigh	15	Hemagglutinin inhibition - A/Indonesia/05/2005 Antigen	DAY28	18NOV2010	40	2.828427125	1	0	Hemagglutinin inhibition	A/Indonesia/05/2005 Antigen	3.68887945411393	11.4933009578097	98056.68	Male	15	59	Non-Hispanic or Non-Latino	Yes	05	3
47FUR004	Primed15	Primed (A)	5	5 (Day 28)	80059	Previously Vaccinated	PriorDoseHigh	15	Hemagglutinin inhibition - A/Indonesia/05/2005 Antigen	DAY28	18NOV2010	40	2.828427125	1	0	Hemagglutinin inhibition	A/Indonesia/05/2005 Antigen	3.68887945411393	10.9469461225019	56780.38	Male	15	59	Non-Hispanic or Non-Latino	Yes	05	3
47FUR004	Primed15	Primed (A)	9	9 (Day 56)	80059	Previously Vaccinated	PriorDoseHigh	15	Hemagglutinin inhibition - A/Indonesia/05/2005 Antigen	DAY56	16DEC2010	28.28427125	2	0	0	Hemagglutinin inhibition	A/Indonesia/05/2005 Antigen	3.34230586392369	11.2176682400279	74434.01	Male	15	59	Non-Hispanic or Non-Latino	Yes	09	3
47FUR004	Primed15	Primed (A)	9	9 (Day 56)	80059	Previously Vaccinated	PriorDoseHigh	15	Hemagglutinin inhibition - A/Indonesia/05/2005 Antigen	DAY56	16DEC2010	28.28427125	2	0	0	Hemagglutinin inhibition	A/Indonesia/05/2005 Antigen	3.34230586392369	11.5669648753274	105552.62	Male	15	59	Non-Hispanic or Non-Latino	Yes	09	3
47FUR004	Primed15	Primed (A)	10	10 (Day 180 or 208)	80059	Previously Vaccinated	PriorDoseHigh	15	Hemagglutinin inhibition - A/Indonesia/05/2005 Antigen	DAY180	14APR2011	28.28427125	2	0	0	Hemagglutinin inhibition	A/Indonesia/05/2005 Antigen	3.34230586392369	11.2980802619251	80666.63	Male	15	59	Non-Hispanic or Non-Latino	Yes	10	3
47FUR004	Primed15	Primed (A)	10	10 (Day 180 or 208)	80059	Previously Vaccinated	PriorDoseHigh	15	Hemagglutinin inhibition - A/Indonesia/05/2005 Antigen	DAY180	14APR2011	28.28427125	2	0	0	Hemagglutinin inhibition	A/Indonesia/05/2005 Antigen	3.34230586392369	10.8182497167457	49923.63	Male	15	59	Non-Hispanic or Non-Latino	Yes	10	3
47FUR005	Primed90	Primed (A)	1	1 (Day 0)	80059	Previously Vaccinated	PriorDoseHigh	90	Hemagglutinin inhibition - A/Indonesia/05/2005 Antigen	PREVAC	21OCT2010	5	.	0	.	Hemagglutinin inhibition	A/Indonesia/05/2005 Antigen	1.6094379124341	12.7130502049843	332053.11	Male	90	45	Non-Hispanic or Non-Latino	No	01	1
47FUR005	Primed90	Primed (A)	1	1 (Day 0)	80059	Previously Vaccinated	PriorDoseHigh	90	Hemagglutinin inhibition - A/Indonesia/05/2005 Antigen	PREVAC	21OCT2010	5	.	0	.	Hemagglutinin inhibition	A/Indonesia/05/2005 Antigen	1.6094379124341	12.8033585769749	363436.03	Male	90	45	Non-Hispanic or Non-Latino	No	01	1
47FUR005	Primed90	Primed (A)	2	2 (Day 3)	80059	Previously Vaccinated	PriorDoseHigh	90	Hemagglutinin inhibition - A/Indonesia/05/2005 Antigen	DAY3	25OCT2010	5	1	0	0	Hemagglutinin inhibition	A/Indonesia/05/2005 Antigen	1.6094379124341	12.1745179413007	193787.59	Male	90	45	Non-Hispanic or Non-Latino	No	02	1
47FUR005	Primed90	Primed (A)	2	2 (Day 3)	80059	Previously Vaccinated	PriorDoseHigh	90	Hemagglutinin inhibition - A/Indonesia/05/2005 Antigen	DAY3	25OCT2010	5	1	0	0	Hemagglutinin inhibition	A/Indonesia/05/2005 Antigen	1.6094379124341	12.6628931327652	315809.08	Male	90	45	Non-Hispanic or Non-Latino	No	02	1
47FUR005	Primed90	Primed (A)	3	3 (Day 7)	80059	Previously Vaccinated	PriorDoseHigh	90	Hemagglutinin inhibition - A/Indonesia/05/2005 Antigen	DAY7	29OCT2010	160	32	1	1	Hemagglutinin inhibition	A/Indonesia/05/2005 Antigen	5.07517381523382	14.1006895001979	1330000	Male	90	45	Non-Hispanic or Non-Latino	No	03	1
47FUR005	Primed90	Primed (A)	3	3 (Day 7)	80059	Previously Vaccinated	PriorDoseHigh	90	Hemagglutinin inhibition - A/Indonesia/05/2005 Antigen	DAY7	29OCT2010	160	32	1	1	Hemagglutinin inhibition	A/Indonesia/05/2005 Antigen	5.07517381523382	14.3283341843929	1670000	Male	90	45	Non-Hispanic or Non-Latino	No	03	1
47FUR005	Primed90	Primed (A)	4	4 (Day 14)	80059	Previously Vaccinated	PriorDoseHigh	90	Hemagglutinin inhibition - A/Indonesia/05/2005 Antigen	DAY14	04NOV2010	452.54834	90.50966799	1	1	Hemagglutinin inhibition	A/Indonesia/05/2005 Antigen	6.11489458616348	14.4360870456893	1860000	Male	90	45	Non-Hispanic or Non-Latino	No	04	1
47FUR005	Primed90	Primed (A)	4	4 (Day 14)	80059	Previously Vaccinated	PriorDoseHigh	90	Hemagglutinin inhibition - A/Indonesia/05/2005 Antigen	DAY14	04NOV2010	452.54834	90.50966799	1	1	Hemagglutinin inhibition	A/Indonesia/05/2005 Antigen	6.11489458616348	14.28551418721	1600000	Male	90	45	Non-Hispanic or Non-Latino	No	04	1
47FUR005	Primed90	Primed (A)	5	5 (Day 28)	80059	Previously Vaccinated	PriorDoseHigh	90	Hemagglutinin inhibition - A/Indonesia/05/2005 Antigen	DAY28	18NOV2010	160	32	1	1	Hemagglutinin inhibition	A/Indonesia/05/2005 Antigen	5.07517381523382	13.6462401590902	844280.58	Male	90	45	Non-Hispanic or Non-Latino	No	05	1
47FUR005	Primed90	Primed (A)	5	5 (Day 28)	80059	Previously Vaccinated	PriorDoseHigh	90	Hemagglutinin inhibition - A/Indonesia/05/2005 Antigen	DAY28	18NOV2010	160	32	1	1	Hemagglutinin inhibition	A/Indonesia/05/2005 Antigen	5.07517381523382	13.4970740866967	727285.28	Male	90	45	Non-Hispanic or Non-Latino	No	05	1
47FUR005	Primed90	Primed (A)	9	9 (Day 56)	80059	Previously Vaccinated	PriorDoseHigh	90	Hemagglutinin inhibition - A/Indonesia/05/2005 Antigen	DAY56	16DEC2010	80	16	1	1	Hemagglutinin inhibition	A/Indonesia/05/2005 Antigen	4.38202663467388	13.2987791627431	596466.98	Male	90	45	Non-Hispanic or Non-Latino	No	09	1
47FUR005	Primed90	Primed (A)	9	9 (Day 56)	80059	Previously Vaccinated	PriorDoseHigh	90	Hemagglutinin inhibition - A/Indonesia/05/2005 Antigen	DAY56	16DEC2010	80	16	1	1	Hemagglutinin inhibition	A/Indonesia/05/2005 Antigen	4.38202663467388	13.022519815333	452489.49	Male	90	45	Non-Hispanic or Non-Latino	No	09	1
47FUR005	Primed90	Primed (A)	10	10 (Day 180 or 208)	80059	Previously Vaccinated	PriorDoseHigh	90	Hemagglutinin inhibition - A/Indonesia/05/2005 Antigen	DAY180	20APR2011	56.5685425	11.3137085	1	1	Hemagglutinin inhibition	A/Indonesia/05/2005 Antigen	4.03545304448364	12.9355825166773	414812.76	Male	90	45	Non-Hispanic or Non-Latino	No	10	1
47FUR005	Primed90	Primed (A)	10	10 (Day 180 or 208)	80059	Previously Vaccinated	PriorDoseHigh	90	Hemagglutinin inhibition - A/Indonesia/05/2005 Antigen	DAY180	20APR2011	56.5685425	11.3137085	1	1	Hemagglutinin inhibition	A/Indonesia/05/2005 Antigen	4.03545304448364	13.170153880174	524475.44	Male	90	45	Non-Hispanic or Non-Latino	No	10	1
47FUR007	Primed90	Primed (A)	1	1 (Day 0)	80059	Previously Vaccinated	PriorDoseLow	90	Hemagglutinin inhibition - A/Indonesia/05/2005 Antigen	PREVAC	27OCT2010	5	.	0	.	Hemagglutinin inhibition	A/Indonesia/05/2005 Antigen	1.6094379124341	10.7843007328782	48257.22	Female	90	53	Non-Hispanic or Non-Latino	Yes	01	2
47FUR007	Primed90	Primed (A)	1	1 (Day 0)	80059	Previously Vaccinated	PriorDoseLow	90	Hemagglutinin inhibition - A/Indonesia/05/2005 Antigen	PREVAC	27OCT2010	5	.	0	.	Hemagglutinin inhibition	A/Indonesia/05/2005 Antigen	1.6094379124341	11.1470826239971	69361.18	Female	90	53	Non-Hispanic or Non-Latino	Yes	01	2
47FUR007	Primed90	Primed (A)	2	2 (Day 3)	80059	Previously Vaccinated	PriorDoseLow	90	Hemagglutinin inhibition - A/Indonesia/05/2005 Antigen	DAY3	29OCT2010	5	1	0	0	Hemagglutinin inhibition	A/Indonesia/05/2005 Antigen	1.6094379124341	10.8229329033635	50157.98	Female	90	53	Non-Hispanic or Non-Latino	Yes	02	2
47FUR007	Primed90	Primed (A)	2	2 (Day 3)	80059	Previously Vaccinated	PriorDoseLow	90	Hemagglutinin inhibition - A/Indonesia/05/2005 Antigen	DAY3	29OCT2010	5	1	0	0	Hemagglutinin inhibition	A/Indonesia/05/2005 Antigen	1.6094379124341	10.1640532775237	25953.28	Female	90	53	Non-Hispanic or Non-Latino	Yes	02	2
47FUR007	Primed90	Primed (A)	3	3 (Day 7)	80059	Previously Vaccinated	PriorDoseLow	90	Hemagglutinin inhibition - A/Indonesia/05/2005 Antigen	DAY7	05NOV2010	56.5685425	11.3137085	1	1	Hemagglutinin inhibition	A/Indonesia/05/2005 Antigen	4.03545304448364	12.5971299580336	295708.65	Female	90	53	Non-Hispanic or Non-Latino	Yes	03	2
47FUR007	Primed90	Primed (A)	3	3 (Day 7)	80059	Previously Vaccinated	PriorDoseLow	90	Hemagglutinin inhibition - A/Indonesia/05/2005 Antigen	DAY7	05NOV2010	56.5685425	11.3137085	1	1	Hemagglutinin inhibition	A/Indonesia/05/2005 Antigen	4.03545304448364	12.4128515433378	245942.13	Female	90	53	Non-Hispanic or Non-Latino	Yes	03	2
47FUR007	Primed90	Primed (A)	4	4 (Day 14)	80059	Previously Vaccinated	PriorDoseLow	90	Hemagglutinin inhibition - A/Indonesia/05/2005 Antigen	DAY14	10NOV2010	113.137085	22.627417	1	1	Hemagglutinin inhibition	A/Indonesia/05/2005 Antigen	4.72860022504359	12.5065373212908	270097.24	Female	90	53	Non-Hispanic or Non-Latino	Yes	04	2
47FUR007	Primed90	Primed (A)	4	4 (Day 14)	80059	Previously Vaccinated	PriorDoseLow	90	Hemagglutinin inhibition - A/Indonesia/05/2005 Antigen	DAY14	10NOV2010	113.137085	22.627417	1	1	Hemagglutinin inhibition	A/Indonesia/05/2005 Antigen	4.72860022504359	12.3116963215582	222280.71	Female	90	53	Non-Hispanic or Non-Latino	Yes	04	2
47FUR007	Primed90	Primed (A)	5	5 (Day 28)	80059	Previously Vaccinated	PriorDoseLow	90	Hemagglutinin inhibition - A/Indonesia/05/2005 Antigen	DAY28	23NOV2010	80	16	1	1	Hemagglutinin inhibition	A/Indonesia/05/2005 Antigen	4.38202663467388	12.0931485423687	178643.69	Female	90	53	Non-Hispanic or Non-Latino	Yes	05	2
47FUR007	Primed90	Primed (A)	5	5 (Day 28)	80059	Previously Vaccinated	PriorDoseLow	90	Hemagglutinin inhibition - A/Indonesia/05/2005 Antigen	DAY28	23NOV2010	80	16	1	1	Hemagglutinin inhibition	A/Indonesia/05/2005 Antigen	4.38202663467388	11.7951463522595	132607.16	Female	90	53	Non-Hispanic or Non-Latino	Yes	05	2
47FUR007	Primed90	Primed (A)	9	9 (Day 56)	80059	Previously Vaccinated	PriorDoseLow	90	Hemagglutinin inhibition - A/Indonesia/05/2005 Antigen	DAY56	20DEC2010	80	16	1	1	Hemagglutinin inhibition	A/Indonesia/05/2005 Antigen	4.38202663467388	11.6341132755742	112883.69	Female	90	53	Non-Hispanic or Non-Latino	Yes	09	2
47FUR007	Primed90	Primed (A)	9	9 (Day 56)	80059	Previously Vaccinated	PriorDoseLow	90	Hemagglutinin inhibition - A/Indonesia/05/2005 Antigen	DAY56	20DEC2010	80	16	1	1	Hemagglutinin inhibition	A/Indonesia/05/2005 Antigen	4.38202663467388	11.8487385558311	139907.75	Female	90	53	Non-Hispanic or Non-Latino	Yes	09	2
47FUR007	Primed90	Primed (A)	10	10 (Day 180 or 208)	80059	Previously Vaccinated	PriorDoseLow	90	Hemagglutinin inhibition - A/Indonesia/05/2005 Antigen	DAY180	20APR2011	28.28427125	5.65685425	0	0	Hemagglutinin inhibition	A/Indonesia/05/2005 Antigen	3.34230586392369	11.3329226977046	83526.79	Female	90	53	Non-Hispanic or Non-Latino	Yes	10	2
47FUR007	Primed90	Primed (A)	10	10 (Day 180 or 208)	80059	Previously Vaccinated	PriorDoseLow	90	Hemagglutinin inhibition - A/Indonesia/05/2005 Antigen	DAY180	20APR2011	28.28427125	5.65685425	0	0	Hemagglutinin inhibition	A/Indonesia/05/2005 Antigen	3.34230586392369	11.2509325815322	76951.65	Female	90	53	Non-Hispanic or Non-Latino	Yes	10	2
47FUR009	Primed15	Primed (A)	1	1 (Day 0)	80059	Previously Vaccinated	PriorDoseHigh	15	Hemagglutinin inhibition - A/Indonesia/05/2005 Antigen	PREVAC	01NOV2010	5	.	0	.	Hemagglutinin inhibition	A/Indonesia/05/2005 Antigen	1.6094379124341	11.3232354274777	82721.55	Female	15	29	Non-Hispanic or Non-Latino	Yes	01	4
47FUR009	Primed15	Primed (A)	1	1 (Day 0)	80059	Previously Vaccinated	PriorDoseHigh	15	Hemagglutinin inhibition - A/Indonesia/05/2005 Antigen	PREVAC	01NOV2010	5	.	0	.	Hemagglutinin inhibition	A/Indonesia/05/2005 Antigen	1.6094379124341	10.6989573138991	44309.63	Female	15	29	Non-Hispanic or Non-Latino	Yes	01	4
47FUR009	Primed15	Primed (A)	2	2 (Day 3)	80059	Previously Vaccinated	PriorDoseHigh	15	Hemagglutinin inhibition - A/Indonesia/05/2005 Antigen	DAY3	03NOV2010	5	1	0	0	Hemagglutinin inhibition	A/Indonesia/05/2005 Antigen	1.6094379124341	11.1854565564811	72074.57	Female	15	29	Non-Hispanic or Non-Latino	Yes	02	4
47FUR009	Primed15	Primed (A)	2	2 (Day 3)	80059	Previously Vaccinated	PriorDoseHigh	15	Hemagglutinin inhibition - A/Indonesia/05/2005 Antigen	DAY3	03NOV2010	5	1	0	0	Hemagglutinin inhibition	A/Indonesia/05/2005 Antigen	1.6094379124341	10.6448328172588	41975.14	Female	15	29	Non-Hispanic or Non-Latino	Yes	02	4
47FUR009	Primed15	Primed (A)	3	3 (Day 7)	80059	Previously Vaccinated	PriorDoseHigh	15	Hemagglutinin inhibition - A/Indonesia/05/2005 Antigen	DAY7	09NOV2010	320	64	1	1	Hemagglutinin inhibition	A/Indonesia/05/2005 Antigen	5.76832099579377	14.3343043513794	1680000	Female	15	29	Non-Hispanic or Non-Latino	Yes	03	4
47FUR009	Primed15	Primed (A)	3	3 (Day 7)	80059	Previously Vaccinated	PriorDoseHigh	15	Hemagglutinin inhibition - A/Indonesia/05/2005 Antigen	DAY7	09NOV2010	320	64	1	1	Hemagglutinin inhibition	A/Indonesia/05/2005 Antigen	5.76832099579377	13.8737794660882	1060000	Female	15	29	Non-Hispanic or Non-Latino	Yes	03	4
47FUR009	Primed15	Primed (A)	4	4 (Day 14)	80059	Previously Vaccinated	PriorDoseHigh	15	Hemagglutinin inhibition - A/Indonesia/05/2005 Antigen	DAY14	15NOV2010	320	64	1	1	Hemagglutinin inhibition	A/Indonesia/05/2005 Antigen	5.76832099579377	14.3636319664739	1730000	Female	15	29	Non-Hispanic or Non-Latino	Yes	04	4
47FUR009	Primed15	Primed (A)	4	4 (Day 14)	80059	Previously Vaccinated	PriorDoseHigh	15	Hemagglutinin inhibition - A/Indonesia/05/2005 Antigen	DAY14	15NOV2010	320	64	1	1	Hemagglutinin inhibition	A/Indonesia/05/2005 Antigen	5.76832099579377	14.0143614167094	1220000	Female	15	29	Non-Hispanic or Non-Latino	Yes	04	4
47FUR009	Primed15	Primed (A)	5	5 (Day 28)	80059	Previously Vaccinated	PriorDoseHigh	15	Hemagglutinin inhibition - A/Indonesia/05/2005 Antigen	DAY28	30NOV2010	160	32	1	1	Hemagglutinin inhibition	A/Indonesia/05/2005 Antigen	5.07517381523382	13.9639305630825	1160000	Female	15	29	Non-Hispanic or Non-Latino	Yes	05	4
47FUR009	Primed15	Primed (A)	5	5 (Day 28)	80059	Previously Vaccinated	PriorDoseHigh	15	Hemagglutinin inhibition - A/Indonesia/05/2005 Antigen	DAY28	30NOV2010	160	32	1	1	Hemagglutinin inhibition	A/Indonesia/05/2005 Antigen	5.07517381523382	14.3343043513794	1680000	Female	15	29	Non-Hispanic or Non-Latino	Yes	05	4
47FUR009	Primed15	Primed (A)	9	9 (Day 56)	80059	Previously Vaccinated	PriorDoseHigh	15	Hemagglutinin inhibition - A/Indonesia/05/2005 Antigen	DAY56	27DEC2010	113.137085	22.627417	1	1	Hemagglutinin inhibition	A/Indonesia/05/2005 Antigen	4.72860022504359	13.9198705732885	1110000	Female	15	29	Non-Hispanic or Non-Latino	Yes	09	4
47FUR009	Primed15	Primed (A)	9	9 (Day 56)	80059	Previously Vaccinated	PriorDoseHigh	15	Hemagglutinin inhibition - A/Indonesia/05/2005 Antigen	DAY56	27DEC2010	113.137085	22.627417	1	1	Hemagglutinin inhibition	A/Indonesia/05/2005 Antigen	4.72860022504359	13.6268477538929	828065.68	Female	15	29	Non-Hispanic or Non-Latino	Yes	09	4
47FUR009	Primed15	Primed (A)	10	10 (Day 180 or 208)	80059	Previously Vaccinated	PriorDoseHigh	15	Hemagglutinin inhibition - A/Indonesia/05/2005 Antigen	DAY180	28APR2011	20	4	0	0	Hemagglutinin inhibition	A/Indonesia/05/2005 Antigen	2.99573227355399	12.8786555738312	391858.3	Female	15	29	Non-Hispanic or Non-Latino	Yes	10	4
47FUR009	Primed15	Primed (A)	10	10 (Day 180 or 208)	80059	Previously Vaccinated	PriorDoseHigh	15	Hemagglutinin inhibition - A/Indonesia/05/2005 Antigen	DAY180	28APR2011	20	4	0	0	Hemagglutinin inhibition	A/Indonesia/05/2005 Antigen	2.99573227355399	12.3572429169207	232638.94	Female	15	29	Non-Hispanic or Non-Latino	Yes	10	4
47FUR011	Multiple	Multiple (A)	1	1 (Day 0)	80059	Previously Vaccinated	MultipleBoost	15	Hemagglutinin inhibition - A/Indonesia/05/2005 Antigen	PREVAC	10NOV2010	5	.	0	.	Hemagglutinin inhibition	A/Indonesia/05/2005 Antigen	1.6094379124341	12.1328347409117	185875.94	Female	15	51	Non-Hispanic or Non-Latino	Yes	01	1
47FUR011	Multiple	Multiple (A)	1	1 (Day 0)	80059	Previously Vaccinated	MultipleBoost	15	Hemagglutinin inhibition - A/Indonesia/05/2005 Antigen	PREVAC	10NOV2010	5	.	0	.	Hemagglutinin inhibition	A/Indonesia/05/2005 Antigen	1.6094379124341	11.8465893332426	139607.38	Female	15	51	Non-Hispanic or Non-Latino	Yes	01	1
47FUR011	Multiple	Multiple (A)	2	2 (Day 3)	80059	Previously Vaccinated	MultipleBoost	15	Hemagglutinin inhibition - A/Indonesia/05/2005 Antigen	DAY3	12NOV2010	5	1	0	0	Hemagglutinin inhibition	A/Indonesia/05/2005 Antigen	1.6094379124341	12.0055688694695	163663.68	Female	15	51	Non-Hispanic or Non-Latino	Yes	02	1
47FUR011	Multiple	Multiple (A)	2	2 (Day 3)	80059	Previously Vaccinated	MultipleBoost	15	Hemagglutinin inhibition - A/Indonesia/05/2005 Antigen	DAY3	12NOV2010	5	1	0	0	Hemagglutinin inhibition	A/Indonesia/05/2005 Antigen	1.6094379124341	11.8301690823782	137333.71	Female	15	51	Non-Hispanic or Non-Latino	Yes	02	1
47FUR011	Multiple	Multiple (A)	3	3 (Day 7)	80059	Previously Vaccinated	MultipleBoost	15	Hemagglutinin inhibition - A/Indonesia/05/2005 Antigen	DAY7	17NOV2010	25.198421	5.0396842	0	0	Hemagglutinin inhibition	A/Indonesia/05/2005 Antigen	3.22678133382407	12.6759491104408	319959.31	Female	15	51	Non-Hispanic or Non-Latino	Yes	03	1
47FUR011	Multiple	Multiple (A)	3	3 (Day 7)	80059	Previously Vaccinated	MultipleBoost	15	Hemagglutinin inhibition - A/Indonesia/05/2005 Antigen	DAY7	17NOV2010	25.198421	5.0396842	0	0	Hemagglutinin inhibition	A/Indonesia/05/2005 Antigen	3.22678133382407	12.3559583862777	232340.3	Female	15	51	Non-Hispanic or Non-Latino	Yes	03	1
47FUR011	Multiple	Multiple (A)	4	4 (Day 14)	80059	Previously Vaccinated	MultipleBoost	15	Hemagglutinin inhibition - A/Indonesia/05/2005 Antigen	DAY14	24NOV2010	40	8	1	1	Hemagglutinin inhibition	A/Indonesia/05/2005 Antigen	3.68887945411393	12.6296887235815	305495.01	Female	15	51	Non-Hispanic or Non-Latino	Yes	04	1
47FUR011	Multiple	Multiple (A)	4	4 (Day 14)	80059	Previously Vaccinated	MultipleBoost	15	Hemagglutinin inhibition - A/Indonesia/05/2005 Antigen	DAY14	24NOV2010	40	8	1	1	Hemagglutinin inhibition	A/Indonesia/05/2005 Antigen	3.68887945411393	12.3933629625642	241195.47	Female	15	51	Non-Hispanic or Non-Latino	Yes	04	1
47FUR011	Multiple	Multiple (A)	5	5 (Day 28)	80059	Previously Vaccinated	MultipleBoost	15	Hemagglutinin inhibition - A/Indonesia/05/2005 Antigen	DAY28	09DEC2010	28.28427125	5.65685425	0	0	Hemagglutinin inhibition	A/Indonesia/05/2005 Antigen	3.34230586392369	12.3278258341337	225895.06	Female	15	51	Non-Hispanic or Non-Latino	Yes	05	1
47FUR011	Multiple	Multiple (A)	5	5 (Day 28)	80059	Previously Vaccinated	MultipleBoost	15	Hemagglutinin inhibition - A/Indonesia/05/2005 Antigen	DAY28	09DEC2010	28.28427125	5.65685425	0	0	Hemagglutinin inhibition	A/Indonesia/05/2005 Antigen	3.34230586392369	11.9510758743101	154983.8	Female	15	51	Non-Hispanic or Non-Latino	Yes	05	1
47FUR011	Multiple	Multiple (A)	9	9 (Day 56)	80059	Previously Vaccinated	MultipleBoost	15	Hemagglutinin inhibition - A/Indonesia/05/2005 Antigen	DAY56	04JAN2011	11.89207115	2.37841423	0	0	Hemagglutinin inhibition	A/Indonesia/05/2005 Antigen	2.47587188813174	12.4725033615342	261059.43	Female	15	51	Non-Hispanic or Non-Latino	Yes	09	1
47FUR011	Multiple	Multiple (A)	9	9 (Day 56)	80059	Previously Vaccinated	MultipleBoost	15	Hemagglutinin inhibition - A/Indonesia/05/2005 Antigen	DAY56	04JAN2011	11.89207115	2.37841423	0	0	Hemagglutinin inhibition	A/Indonesia/05/2005 Antigen	2.47587188813174	12.2831696959351	216029.38	Female	15	51	Non-Hispanic or Non-Latino	Yes	09	1
47FUR011	Multiple	Multiple (A)	10	10 (Day 180 or 208)	80059	Previously Vaccinated	MultipleBoost	15	Hemagglutinin inhibition - A/Indonesia/05/2005 Antigen	DAY180	03MAY2011	7.071067812	1.414213562	0	0	Hemagglutinin inhibition	A/Indonesia/05/2005 Antigen	1.95601150273309	12.5132325866674	271911.68	Female	15	51	Non-Hispanic or Non-Latino	Yes	10	1
47FUR011	Multiple	Multiple (A)	10	10 (Day 180 or 208)	80059	Previously Vaccinated	MultipleBoost	15	Hemagglutinin inhibition - A/Indonesia/05/2005 Antigen	DAY180	03MAY2011	7.071067812	1.414213562	0	0	Hemagglutinin inhibition	A/Indonesia/05/2005 Antigen	1.95601150273309	12.108525250024	181411.87	Female	15	51	Non-Hispanic or Non-Latino	Yes	10	1
47FUR012	Primed15	Primed (A)	1	1 (Day 0)	80059	Previously Vaccinated	PriorDoseHigh	15	Hemagglutinin inhibition - A/Indonesia/05/2005 Antigen	PREVAC	10NOV2010	7.071067812	.	0	.	Hemagglutinin inhibition	A/Indonesia/05/2005 Antigen	1.95601150273309	12.3533224835112	231728.68	Male	15	64	Non-Hispanic or Non-Latino	Yes	01	5
47FUR012	Primed15	Primed (A)	1	1 (Day 0)	80059	Previously Vaccinated	PriorDoseHigh	15	Hemagglutinin inhibition - A/Indonesia/05/2005 Antigen	PREVAC	10NOV2010	7.071067812	.	0	.	Hemagglutinin inhibition	A/Indonesia/05/2005 Antigen	1.95601150273309	11.9690747519927	157798.59	Male	15	64	Non-Hispanic or Non-Latino	Yes	01	5
47FUR012	Primed15	Primed (A)	2	2 (Day 3)	80059	Previously Vaccinated	PriorDoseHigh	15	Hemagglutinin inhibition - A/Indonesia/05/2005 Antigen	DAY3	12NOV2010	5	0.707106781	0	0	Hemagglutinin inhibition	A/Indonesia/05/2005 Antigen	1.6094379124341	12.3991989947536	242607.21	Male	15	64	Non-Hispanic or Non-Latino	Yes	02	5
47FUR012	Primed15	Primed (A)	2	2 (Day 3)	80059	Previously Vaccinated	PriorDoseHigh	15	Hemagglutinin inhibition - A/Indonesia/05/2005 Antigen	DAY3	12NOV2010	5	0.707106781	0	0	Hemagglutinin inhibition	A/Indonesia/05/2005 Antigen	1.6094379124341	12.1557610270358	190186.61	Male	15	64	Non-Hispanic or Non-Latino	Yes	02	5
47FUR012	Primed15	Primed (A)	3	3 (Day 7)	80059	Previously Vaccinated	PriorDoseHigh	15	Hemagglutinin inhibition - A/Indonesia/05/2005 Antigen	DAY7	17NOV2010	5	0.707106781	0	0	Hemagglutinin inhibition	A/Indonesia/05/2005 Antigen	1.6094379124341	12.427839609783	249656.09	Male	15	64	Non-Hispanic or Non-Latino	Yes	03	5
47FUR012	Primed15	Primed (A)	3	3 (Day 7)	80059	Previously Vaccinated	PriorDoseHigh	15	Hemagglutinin inhibition - A/Indonesia/05/2005 Antigen	DAY7	17NOV2010	5	0.707106781	0	0	Hemagglutinin inhibition	A/Indonesia/05/2005 Antigen	1.6094379124341	12.3226058782859	224718.97	Male	15	64	Non-Hispanic or Non-Latino	Yes	03	5
47FUR012	Primed15	Primed (A)	4	4 (Day 14)	80059	Previously Vaccinated	PriorDoseHigh	15	Hemagglutinin inhibition - A/Indonesia/05/2005 Antigen	DAY14	22NOV2010	5	0.707106781	0	0	Hemagglutinin inhibition	A/Indonesia/05/2005 Antigen	1.6094379124341	12.3064081770759	221108.36	Male	15	64	Non-Hispanic or Non-Latino	Yes	04	5
47FUR012	Primed15	Primed (A)	4	4 (Day 14)	80059	Previously Vaccinated	PriorDoseHigh	15	Hemagglutinin inhibition - A/Indonesia/05/2005 Antigen	DAY14	22NOV2010	5	0.707106781	0	0	Hemagglutinin inhibition	A/Indonesia/05/2005 Antigen	1.6094379124341	12.2571255810338	210475.72	Male	15	64	Non-Hispanic or Non-Latino	Yes	04	5
47FUR012	Primed15	Primed (A)	9	9 (Day 56)	80059	Previously Vaccinated	PriorDoseHigh	15	Hemagglutinin inhibition - A/Indonesia/05/2005 Antigen	DAY56	06JAN2011	20	2.828427125	0	0	Hemagglutinin inhibition	A/Indonesia/05/2005 Antigen	2.99573227355399	12.2645877026022	212052.19	Male	15	64	Non-Hispanic or Non-Latino	Yes	09	5
47FUR012	Primed15	Primed (A)	9	9 (Day 56)	80059	Previously Vaccinated	PriorDoseHigh	15	Hemagglutinin inhibition - A/Indonesia/05/2005 Antigen	DAY56	06JAN2011	20	2.828427125	0	0	Hemagglutinin inhibition	A/Indonesia/05/2005 Antigen	2.99573227355399	12.1907629478925	196961.38	Male	15	64	Non-Hispanic or Non-Latino	Yes	09	5
47FUR012	Primed15	Primed (A)	10	10 (Day 180 or 208)	80059	Previously Vaccinated	PriorDoseHigh	15	Hemagglutinin inhibition - A/Indonesia/05/2005 Antigen	DAY180	04MAY2011	40	5.65685425	1	1	Hemagglutinin inhibition	A/Indonesia/05/2005 Antigen	3.68887945411393	12.2440350673668	207738.44	Male	15	64	Non-Hispanic or Non-Latino	Yes	10	5
47FUR012	Primed15	Primed (A)	10	10 (Day 180 or 208)	80059	Previously Vaccinated	PriorDoseHigh	15	Hemagglutinin inhibition - A/Indonesia/05/2005 Antigen	DAY180	04MAY2011	40	5.65685425	1	1	Hemagglutinin inhibition	A/Indonesia/05/2005 Antigen	3.68887945411393	12.2732151327783	213889.57	Male	15	64	Non-Hispanic or Non-Latino	Yes	10	5
47FUR015	Primed15	Primed (A)	1	1 (Day 0)	80059	Previously Vaccinated	PriorDoseLow	15	Hemagglutinin inhibition - A/Indonesia/05/2005 Antigen	PREVAC	18NOV2010	5	.	0	.	Hemagglutinin inhibition	A/Indonesia/05/2005 Antigen	1.6094379124341	10.9313726094407	55902.96	Female	15	52	Non-Hispanic or Non-Latino	Yes	01	1
47FUR015	Primed15	Primed (A)	1	1 (Day 0)	80059	Previously Vaccinated	PriorDoseLow	15	Hemagglutinin inhibition - A/Indonesia/05/2005 Antigen	PREVAC	18NOV2010	5	.	0	.	Hemagglutinin inhibition	A/Indonesia/05/2005 Antigen	1.6094379124341	11.2773518545665	79011.75	Female	15	52	Non-Hispanic or Non-Latino	Yes	01	1
47FUR015	Primed15	Primed (A)	2	2 (Day 3)	80059	Previously Vaccinated	PriorDoseLow	15	Hemagglutinin inhibition - A/Indonesia/05/2005 Antigen	DAY3	22NOV2010	5	1	0	0	Hemagglutinin inhibition	A/Indonesia/05/2005 Antigen	1.6094379124341	11.2764357484785	78939.4	Female	15	52	Non-Hispanic or Non-Latino	Yes	02	1
47FUR015	Primed15	Primed (A)	2	2 (Day 3)	80059	Previously Vaccinated	PriorDoseLow	15	Hemagglutinin inhibition - A/Indonesia/05/2005 Antigen	DAY3	22NOV2010	5	1	0	0	Hemagglutinin inhibition	A/Indonesia/05/2005 Antigen	1.6094379124341	10.8562608291226	51857.81	Female	15	52	Non-Hispanic or Non-Latino	Yes	02	1
47FUR015	Primed15	Primed (A)	3	3 (Day 7)	80059	Previously Vaccinated	PriorDoseLow	15	Hemagglutinin inhibition - A/Indonesia/05/2005 Antigen	DAY7	24NOV2010	5	1	0	0	Hemagglutinin inhibition	A/Indonesia/05/2005 Antigen	1.6094379124341	11.7019895729249	120811.84	Female	15	52	Non-Hispanic or Non-Latino	Yes	03	1
47FUR015	Primed15	Primed (A)	3	3 (Day 7)	80059	Previously Vaccinated	PriorDoseLow	15	Hemagglutinin inhibition - A/Indonesia/05/2005 Antigen	DAY7	24NOV2010	5	1	0	0	Hemagglutinin inhibition	A/Indonesia/05/2005 Antigen	1.6094379124341	11.1507989740294	69619.43	Female	15	52	Non-Hispanic or Non-Latino	Yes	03	1
47FUR015	Primed15	Primed (A)	4	4 (Day 14)	80059	Previously Vaccinated	PriorDoseLow	15	Hemagglutinin inhibition - A/Indonesia/05/2005 Antigen	DAY14	01DEC2010	56.5685425	11.3137085	1	1	Hemagglutinin inhibition	A/Indonesia/05/2005 Antigen	4.03545304448364	13.2207186616231	551677.36	Female	15	52	Non-Hispanic or Non-Latino	Yes	04	1
47FUR015	Primed15	Primed (A)	4	4 (Day 14)	80059	Previously Vaccinated	PriorDoseLow	15	Hemagglutinin inhibition - A/Indonesia/05/2005 Antigen	DAY14	01DEC2010	56.5685425	11.3137085	1	1	Hemagglutinin inhibition	A/Indonesia/05/2005 Antigen	4.03545304448364	12.7887249856491	358156.38	Female	15	52	Non-Hispanic or Non-Latino	Yes	04	1
47FUR015	Primed15	Primed (A)	9	9 (Day 56)	80059	Previously Vaccinated	PriorDoseLow	15	Hemagglutinin inhibition - A/Indonesia/05/2005 Antigen	DAY56	12JAN2011	7.071067812	1.414213562	0	0	Hemagglutinin inhibition	A/Indonesia/05/2005 Antigen	1.95601150273309	12.6046565322468	297942.72	Female	15	52	Non-Hispanic or Non-Latino	Yes	09	1
47FUR015	Primed15	Primed (A)	9	9 (Day 56)	80059	Previously Vaccinated	PriorDoseLow	15	Hemagglutinin inhibition - A/Indonesia/05/2005 Antigen	DAY56	12JAN2011	7.071067812	1.414213562	0	0	Hemagglutinin inhibition	A/Indonesia/05/2005 Antigen	1.95601150273309	12.3784537930884	237626.12	Female	15	52	Non-Hispanic or Non-Latino	Yes	09	1
47FUR015	Primed15	Primed (A)	10	10 (Day 180 or 208)	80059	Previously Vaccinated	PriorDoseLow	15	Hemagglutinin inhibition - A/Indonesia/05/2005 Antigen	DAY180	11MAY2011	5	1	0	0	Hemagglutinin inhibition	A/Indonesia/05/2005 Antigen	1.6094379124341	11.8118849575995	134845.5	Female	15	52	Non-Hispanic or Non-Latino	Yes	10	1
47FUR015	Primed15	Primed (A)	10	10 (Day 180 or 208)	80059	Previously Vaccinated	PriorDoseLow	15	Hemagglutinin inhibition - A/Indonesia/05/2005 Antigen	DAY180	11MAY2011	5	1	0	0	Hemagglutinin inhibition	A/Indonesia/05/2005 Antigen	1.6094379124341	11.7200607652292	123014.9	Female	15	52	Non-Hispanic or Non-Latino	Yes	10	1
47FUR018	Primed90	Primed (A)	1	1 (Day 0)	80059	Previously Vaccinated	PriorDoseHigh	90	Hemagglutinin inhibition - A/Indonesia/05/2005 Antigen	PREVAC	07DEC2010	5	.	0	.	Hemagglutinin inhibition	A/Indonesia/05/2005 Antigen	1.6094379124341	11.9331952411622	152237.22	Female	90	42	Non-Hispanic or Non-Latino	Yes	01	3
47FUR018	Primed90	Primed (A)	1	1 (Day 0)	80059	Previously Vaccinated	PriorDoseHigh	90	Hemagglutinin inhibition - A/Indonesia/05/2005 Antigen	PREVAC	07DEC2010	5	.	0	.	Hemagglutinin inhibition	A/Indonesia/05/2005 Antigen	1.6094379124341	11.6777929145345	117923.68	Female	90	42	Non-Hispanic or Non-Latino	Yes	01	3
47FUR018	Primed90	Primed (A)	2	2 (Day 3)	80059	Previously Vaccinated	PriorDoseHigh	90	Hemagglutinin inhibition - A/Indonesia/05/2005 Antigen	DAY3	10DEC2010	5	1	0	0	Hemagglutinin inhibition	A/Indonesia/05/2005 Antigen	1.6094379124341	11.7713088933363	129483.52	Female	90	42	Non-Hispanic or Non-Latino	Yes	02	3
47FUR018	Primed90	Primed (A)	2	2 (Day 3)	80059	Previously Vaccinated	PriorDoseHigh	90	Hemagglutinin inhibition - A/Indonesia/05/2005 Antigen	DAY3	10DEC2010	5	1	0	0	Hemagglutinin inhibition	A/Indonesia/05/2005 Antigen	1.6094379124341	11.4297992581958	92023.5	Female	90	42	Non-Hispanic or Non-Latino	Yes	02	3
47FUR018	Primed90	Primed (A)	3	3 (Day 7)	80059	Previously Vaccinated	PriorDoseHigh	90	Hemagglutinin inhibition - A/Indonesia/05/2005 Antigen	DAY7	14DEC2010	5	1	0	0	Hemagglutinin inhibition	A/Indonesia/05/2005 Antigen	1.6094379124341	12.5271522351535	275723.06	Female	90	42	Non-Hispanic or Non-Latino	Yes	03	3
47FUR018	Primed90	Primed (A)	3	3 (Day 7)	80059	Previously Vaccinated	PriorDoseHigh	90	Hemagglutinin inhibition - A/Indonesia/05/2005 Antigen	DAY7	14DEC2010	5	1	0	0	Hemagglutinin inhibition	A/Indonesia/05/2005 Antigen	1.6094379124341	12.4575581425113	257186.85	Female	90	42	Non-Hispanic or Non-Latino	Yes	03	3
47FUR018	Primed90	Primed (A)	4	4 (Day 14)	80059	Previously Vaccinated	PriorDoseHigh	90	Hemagglutinin inhibition - A/Indonesia/05/2005 Antigen	DAY14	21DEC2010	113.137085	22.627417	1	1	Hemagglutinin inhibition	A/Indonesia/05/2005 Antigen	4.72860022504359	13.400192049155	660129.99	Female	90	42	Non-Hispanic or Non-Latino	Yes	04	3
47FUR018	Primed90	Primed (A)	4	4 (Day 14)	80059	Previously Vaccinated	PriorDoseHigh	90	Hemagglutinin inhibition - A/Indonesia/05/2005 Antigen	DAY14	21DEC2010	113.137085	22.627417	1	1	Hemagglutinin inhibition	A/Indonesia/05/2005 Antigen	4.72860022504359	13.2364095909406	560401.96	Female	90	42	Non-Hispanic or Non-Latino	Yes	04	3
47FUR018	Primed90	Primed (A)	9	9 (Day 56)	80059	Previously Vaccinated	PriorDoseHigh	90	Hemagglutinin inhibition - A/Indonesia/05/2005 Antigen	DAY56	01FEB2011	80	16	1	1	Hemagglutinin inhibition	A/Indonesia/05/2005 Antigen	4.38202663467388	12.8831902359288	393639.28	Female	90	42	Non-Hispanic or Non-Latino	Yes	09	3
47FUR018	Primed90	Primed (A)	9	9 (Day 56)	80059	Previously Vaccinated	PriorDoseHigh	90	Hemagglutinin inhibition - A/Indonesia/05/2005 Antigen	DAY56	01FEB2011	80	16	1	1	Hemagglutinin inhibition	A/Indonesia/05/2005 Antigen	4.38202663467388	13.1468861999714	512412.99	Female	90	42	Non-Hispanic or Non-Latino	Yes	09	3
47FUR018	Primed90	Primed (A)	10	10 (Day 180 or 208)	80059	Previously Vaccinated	PriorDoseHigh	90	Hemagglutinin inhibition - A/Indonesia/05/2005 Antigen	DAY180	08JUN2011	40	8	1	1	Hemagglutinin inhibition	A/Indonesia/05/2005 Antigen	3.68887945411393	12.6336259696	306700.19	Female	90	42	Non-Hispanic or Non-Latino	Yes	10	3
47FUR018	Primed90	Primed (A)	10	10 (Day 180 or 208)	80059	Previously Vaccinated	PriorDoseHigh	90	Hemagglutinin inhibition - A/Indonesia/05/2005 Antigen	DAY180	08JUN2011	40	8	1	1	Hemagglutinin inhibition	A/Indonesia/05/2005 Antigen	3.68887945411393	12.3880717753501	239922.63	Female	90	42	Non-Hispanic or Non-Latino	Yes	10	3
47FUR023	Primed15	Primed (A)	1	1 (Day 0)	80059	Previously Vaccinated	PriorDoseLow	15	Hemagglutinin inhibition - A/Indonesia/05/2005 Antigen	PREVAC	04JAN2011	5	.	0	.	Hemagglutinin inhibition	A/Indonesia/05/2005 Antigen	1.6094379124341	12.470392880455	260509.05	Female	15	52	Non-Hispanic or Non-Latino	Yes	01	2
47FUR023	Primed15	Primed (A)	1	1 (Day 0)	80059	Previously Vaccinated	PriorDoseLow	15	Hemagglutinin inhibition - A/Indonesia/05/2005 Antigen	PREVAC	04JAN2011	5	.	0	.	Hemagglutinin inhibition	A/Indonesia/05/2005 Antigen	1.6094379124341	12.2083001128817	200445.99	Female	15	52	Non-Hispanic or Non-Latino	Yes	01	2
47FUR023	Primed15	Primed (A)	2	2 (Day 3)	80059	Previously Vaccinated	PriorDoseLow	15	Hemagglutinin inhibition - A/Indonesia/05/2005 Antigen	DAY3	06JAN2011	5	1	0	0	Hemagglutinin inhibition	A/Indonesia/05/2005 Antigen	1.6094379124341	11.8844752971706	144998.01	Female	15	52	Non-Hispanic or Non-Latino	Yes	02	2
47FUR023	Primed15	Primed (A)	2	2 (Day 3)	80059	Previously Vaccinated	PriorDoseLow	15	Hemagglutinin inhibition - A/Indonesia/05/2005 Antigen	DAY3	06JAN2011	5	1	0	0	Hemagglutinin inhibition	A/Indonesia/05/2005 Antigen	1.6094379124341	11.6190422246034	111195.17	Female	15	52	Non-Hispanic or Non-Latino	Yes	02	2
47FUR023	Primed15	Primed (A)	3	3 (Day 7)	80059	Previously Vaccinated	PriorDoseLow	15	Hemagglutinin inhibition - A/Indonesia/05/2005 Antigen	DAY7	11JAN2011	452.54834	90.50966799	1	1	Hemagglutinin inhibition	A/Indonesia/05/2005 Antigen	6.11489458616348	15.0214813649528	3340000	Female	15	52	Non-Hispanic or Non-Latino	Yes	03	2
47FUR023	Primed15	Primed (A)	3	3 (Day 7)	80059	Previously Vaccinated	PriorDoseLow	15	Hemagglutinin inhibition - A/Indonesia/05/2005 Antigen	DAY7	11JAN2011	452.54834	90.50966799	1	1	Hemagglutinin inhibition	A/Indonesia/05/2005 Antigen	6.11489458616348	14.9597333578844	3140000	Female	15	52	Non-Hispanic or Non-Latino	Yes	03	2
47FUR023	Primed15	Primed (A)	4	4 (Day 14)	80059	Previously Vaccinated	PriorDoseLow	15	Hemagglutinin inhibition - A/Indonesia/05/2005 Antigen	DAY14	18JAN2011	640	128	1	1	Hemagglutinin inhibition	A/Indonesia/05/2005 Antigen	6.46146817635371	14.8379614856668	2780000	Female	15	52	Non-Hispanic or Non-Latino	Yes	04	2
47FUR023	Primed15	Primed (A)	4	4 (Day 14)	80059	Previously Vaccinated	PriorDoseLow	15	Hemagglutinin inhibition - A/Indonesia/05/2005 Antigen	DAY14	18JAN2011	640	128	1	1	Hemagglutinin inhibition	A/Indonesia/05/2005 Antigen	6.46146817635371	14.473030560881	1930000	Female	15	52	Non-Hispanic or Non-Latino	Yes	04	2
47FUR023	Primed15	Primed (A)	5	5 (Day 28)	80059	Previously Vaccinated	PriorDoseLow	15	Hemagglutinin inhibition - A/Indonesia/05/2005 Antigen	DAY28	26JAN2011	452.54834	90.50966799	1	1	Hemagglutinin inhibition	A/Indonesia/05/2005 Antigen	6.11489458616348	14.5036451967006	1990000	Female	15	52	Non-Hispanic or Non-Latino	Yes	05	2
47FUR023	Primed15	Primed (A)	5	5 (Day 28)	80059	Previously Vaccinated	PriorDoseLow	15	Hemagglutinin inhibition - A/Indonesia/05/2005 Antigen	DAY28	26JAN2011	452.54834	90.50966799	1	1	Hemagglutinin inhibition	A/Indonesia/05/2005 Antigen	6.11489458616348	14.3343043513794	1680000	Female	15	52	Non-Hispanic or Non-Latino	Yes	05	2
47FUR023	Primed15	Primed (A)	9	9 (Day 56)	80059	Previously Vaccinated	PriorDoseLow	15	Hemagglutinin inhibition - A/Indonesia/05/2005 Antigen	DAY56	03MAR2011	226.27417	45.254834	1	1	Hemagglutinin inhibition	A/Indonesia/05/2005 Antigen	5.42174740560353	14.108180171927	1340000	Female	15	52	Non-Hispanic or Non-Latino	Yes	09	2
47FUR023	Primed15	Primed (A)	9	9 (Day 56)	80059	Previously Vaccinated	PriorDoseLow	15	Hemagglutinin inhibition - A/Indonesia/05/2005 Antigen	DAY56	03MAR2011	226.27417	45.254834	1	1	Hemagglutinin inhibition	A/Indonesia/05/2005 Antigen	5.42174740560353	13.9978321147582	1200000	Female	15	52	Non-Hispanic or Non-Latino	Yes	09	2
47FUR023	Primed15	Primed (A)	10	10 (Day 180 or 208)	80059	Previously Vaccinated	PriorDoseLow	15	Hemagglutinin inhibition - A/Indonesia/05/2005 Antigen	DAY180	27JUN2011	56.5685425	11.3137085	1	1	Hemagglutinin inhibition	A/Indonesia/05/2005 Antigen	4.03545304448364	13.6670717194686	862052.73	Female	15	52	Non-Hispanic or Non-Latino	Yes	10	2
47FUR023	Primed15	Primed (A)	10	10 (Day 180 or 208)	80059	Previously Vaccinated	PriorDoseLow	15	Hemagglutinin inhibition - A/Indonesia/05/2005 Antigen	DAY180	27JUN2011	56.5685425	11.3137085	1	1	Hemagglutinin inhibition	A/Indonesia/05/2005 Antigen	4.03545304448364	13.6561321506836	852673.64	Female	15	52	Non-Hispanic or Non-Latino	Yes	10	2
47FUR024	Primed90	Primed (A)	1	1 (Day 0)	80059	Previously Vaccinated	PriorDoseLow	90	Hemagglutinin inhibition - A/Indonesia/05/2005 Antigen	PREVAC	04JAN2011	5	.	0	.	Hemagglutinin inhibition	A/Indonesia/05/2005 Antigen	1.6094379124341	11.8531808934309	140530.65	Male	90	56	Non-Hispanic or Non-Latino	Yes	01	4
47FUR024	Primed90	Primed (A)	1	1 (Day 0)	80059	Previously Vaccinated	PriorDoseLow	90	Hemagglutinin inhibition - A/Indonesia/05/2005 Antigen	PREVAC	04JAN2011	5	.	0	.	Hemagglutinin inhibition	A/Indonesia/05/2005 Antigen	1.6094379124341	11.300250427061	80841.88	Male	90	56	Non-Hispanic or Non-Latino	Yes	01	4
47FUR024	Primed90	Primed (A)	2	2 (Day 3)	80059	Previously Vaccinated	PriorDoseLow	90	Hemagglutinin inhibition - A/Indonesia/05/2005 Antigen	DAY3	06JAN2011	5	1	0	0	Hemagglutinin inhibition	A/Indonesia/05/2005 Antigen	1.6094379124341	12.2538170726309	209780.51	Male	90	56	Non-Hispanic or Non-Latino	Yes	02	4
47FUR024	Primed90	Primed (A)	2	2 (Day 3)	80059	Previously Vaccinated	PriorDoseLow	90	Hemagglutinin inhibition - A/Indonesia/05/2005 Antigen	DAY3	06JAN2011	5	1	0	0	Hemagglutinin inhibition	A/Indonesia/05/2005 Antigen	1.6094379124341	11.7903073976428	131967.03	Male	90	56	Non-Hispanic or Non-Latino	Yes	02	4
47FUR024	Primed90	Primed (A)	3	3 (Day 7)	80059	Previously Vaccinated	PriorDoseLow	90	Hemagglutinin inhibition - A/Indonesia/05/2005 Antigen	DAY7	11JAN2011	14.14213562	2.828427125	0	0	Hemagglutinin inhibition	A/Indonesia/05/2005 Antigen	2.6491586830102	12.8760574371101	390841.52	Male	90	56	Non-Hispanic or Non-Latino	Yes	03	4
47FUR024	Primed90	Primed (A)	3	3 (Day 7)	80059	Previously Vaccinated	PriorDoseLow	90	Hemagglutinin inhibition - A/Indonesia/05/2005 Antigen	DAY7	11JAN2011	14.14213562	2.828427125	0	0	Hemagglutinin inhibition	A/Indonesia/05/2005 Antigen	2.6491586830102	12.8545794309565	382536.53	Male	90	56	Non-Hispanic or Non-Latino	Yes	03	4
47FUR024	Primed90	Primed (A)	4	4 (Day 14)	80059	Previously Vaccinated	PriorDoseLow	90	Hemagglutinin inhibition - A/Indonesia/05/2005 Antigen	DAY14	18JAN2011	56.5685425	11.3137085	1	1	Hemagglutinin inhibition	A/Indonesia/05/2005 Antigen	4.03545304448364	13.8924715991004	1080000	Male	90	56	Non-Hispanic or Non-Latino	Yes	04	4
47FUR024	Primed90	Primed (A)	4	4 (Day 14)	80059	Previously Vaccinated	PriorDoseLow	90	Hemagglutinin inhibition - A/Indonesia/05/2005 Antigen	DAY14	18JAN2011	56.5685425	11.3137085	1	1	Hemagglutinin inhibition	A/Indonesia/05/2005 Antigen	4.03545304448364	11.8679815893272	142626.07	Male	90	56	Non-Hispanic or Non-Latino	Yes	04	4
47FUR024	Primed90	Primed (A)	5	5 (Day 28)	80059	Previously Vaccinated	PriorDoseLow	90	Hemagglutinin inhibition - A/Indonesia/05/2005 Antigen	DAY28	01FEB2011	56.5685425	11.3137085	1	1	Hemagglutinin inhibition	A/Indonesia/05/2005 Antigen	4.03545304448364	13.7227147634422	911379.59	Male	90	56	Non-Hispanic or Non-Latino	Yes	05	4
47FUR024	Primed90	Primed (A)	5	5 (Day 28)	80059	Previously Vaccinated	PriorDoseLow	90	Hemagglutinin inhibition - A/Indonesia/05/2005 Antigen	DAY28	01FEB2011	56.5685425	11.3137085	1	1	Hemagglutinin inhibition	A/Indonesia/05/2005 Antigen	4.03545304448364	11.2235731985206	74874.84	Male	90	56	Non-Hispanic or Non-Latino	Yes	05	4
47FUR024	Primed90	Primed (A)	9	9 (Day 56)	80059	Previously Vaccinated	PriorDoseLow	90	Hemagglutinin inhibition - A/Indonesia/05/2005 Antigen	DAY56	01MAR2011	56.5685425	11.3137085	1	1	Hemagglutinin inhibition	A/Indonesia/05/2005 Antigen	4.03545304448364	13.538901802742	758351.14	Male	90	56	Non-Hispanic or Non-Latino	Yes	09	4
47FUR024	Primed90	Primed (A)	9	9 (Day 56)	80059	Previously Vaccinated	PriorDoseLow	90	Hemagglutinin inhibition - A/Indonesia/05/2005 Antigen	DAY56	01MAR2011	56.5685425	11.3137085	1	1	Hemagglutinin inhibition	A/Indonesia/05/2005 Antigen	4.03545304448364	10.9041481089034	54401.56	Male	90	56	Non-Hispanic or Non-Latino	Yes	09	4
47FUR024	Primed90	Primed (A)	10	10 (Day 180 or 208)	80059	Previously Vaccinated	PriorDoseLow	90	Hemagglutinin inhibition - A/Indonesia/05/2005 Antigen	DAY180	11JUL2011	11.89207115	2.37841423	0	0	Hemagglutinin inhibition	A/Indonesia/05/2005 Antigen	2.47587188813174	12.8615238259709	385202.26	Male	90	56	Non-Hispanic or Non-Latino	Yes	10	4
47FUR024	Primed90	Primed (A)	10	10 (Day 180 or 208)	80059	Previously Vaccinated	PriorDoseLow	90	Hemagglutinin inhibition - A/Indonesia/05/2005 Antigen	DAY180	11JUL2011	11.89207115	2.37841423	0	0	Hemagglutinin inhibition	A/Indonesia/05/2005 Antigen	2.47587188813174	10.9595346615525	57499.68	Male	90	56	Non-Hispanic or Non-Latino	Yes	10	4
47FUR027	Multiple	Multiple (A)	5	5 (Day 28)	80059	Previously Vaccinated	MultipleBoost	15	Hemagglutinin inhibition - A/Indonesia/05/2005 Antigen	DAY28	07FEB2011	56.5685425	11.3137085	1	1	Hemagglutinin inhibition	A/Indonesia/05/2005 Antigen	4.03545304448364	13.1170792208073	497364.89	Male	15	46	Non-Hispanic or Non-Latino	Yes	05	3
47FUR027	Multiple	Multiple (A)	5	5 (Day 28)	80059	Previously Vaccinated	MultipleBoost	15	Hemagglutinin inhibition - A/Indonesia/05/2005 Antigen	DAY28	07FEB2011	56.5685425	11.3137085	1	1	Hemagglutinin inhibition	A/Indonesia/05/2005 Antigen	4.03545304448364	13.1508647664125	514455.72	Male	15	46	Non-Hispanic or Non-Latino	Yes	05	3
47FUR027	Multiple	Multiple (A)	5	5 (Day 28)	80059	Previously Vaccinated	MultipleBoost	15	Hemagglutinin inhibition - A/Indonesia/05/2005 Antigen	DAY28	07FEB2011	56.5685425	11.3137085	1	1	Hemagglutinin inhibition	A/Indonesia/05/2005 Antigen	4.03545304448364	13.295250099121	594365.72	Male	15	46	Non-Hispanic or Non-Latino	Yes	05	1
47FUR027	Multiple	Multiple (A)	5	5 (Day 28)	80059	Previously Vaccinated	MultipleBoost	15	Hemagglutinin inhibition - A/Indonesia/05/2005 Antigen	DAY28	07FEB2011	56.5685425	11.3137085	1	1	Hemagglutinin inhibition	A/Indonesia/05/2005 Antigen	4.03545304448364	13.3068346718556	601291.23	Male	15	46	Non-Hispanic or Non-Latino	Yes	05	1
47FUR027	Multiple	Multiple (A)	5	5 (Day 28)	80059	Previously Vaccinated	MultipleBoost	15	Hemagglutinin inhibition - A/Indonesia/05/2005 Antigen	DAY28	07FEB2011	56.5685425	11.3137085	1	1	Hemagglutinin inhibition	A/Indonesia/05/2005 Antigen	4.03545304448364	13.3251371053971	612397.65	Male	15	46	Non-Hispanic or Non-Latino	Yes	05	4
47FUR027	Multiple	Multiple (A)	5	5 (Day 28)	80059	Previously Vaccinated	MultipleBoost	15	Hemagglutinin inhibition - A/Indonesia/05/2005 Antigen	DAY28	07FEB2011	56.5685425	11.3137085	1	1	Hemagglutinin inhibition	A/Indonesia/05/2005 Antigen	4.03545304448364	13.3037556692319	599442.7	Male	15	46	Non-Hispanic or Non-Latino	Yes	05	5
47FUR027	Multiple	Multiple (A)	5	5 (Day 28)	80059	Previously Vaccinated	MultipleBoost	15	Hemagglutinin inhibition - A/Indonesia/05/2005 Antigen	DAY28	07FEB2011	56.5685425	11.3137085	1	1	Hemagglutinin inhibition	A/Indonesia/05/2005 Antigen	4.03545304448364	13.3826774031064	648668.71	Male	15	46	Non-Hispanic or Non-Latino	Yes	05	2
47FUR027	Multiple	Multiple (A)	5	5 (Day 28)	80059	Previously Vaccinated	MultipleBoost	15	Hemagglutinin inhibition - A/Indonesia/05/2005 Antigen	DAY28	07FEB2011	56.5685425	11.3137085	1	1	Hemagglutinin inhibition	A/Indonesia/05/2005 Antigen	4.03545304448364	13.3851041094605	650244.75	Male	15	46	Non-Hispanic or Non-Latino	Yes	05	4
47FUR027	Multiple	Multiple (A)	5	5 (Day 28)	80059	Previously Vaccinated	MultipleBoost	15	Hemagglutinin inhibition - A/Indonesia/05/2005 Antigen	DAY28	07FEB2011	56.5685425	11.3137085	1	1	Hemagglutinin inhibition	A/Indonesia/05/2005 Antigen	4.03545304448364	13.6305530741651	831139.62	Male	15	46	Non-Hispanic or Non-Latino	Yes	05	2
47FUR027	Multiple	Multiple (A)	5	5 (Day 28)	80059	Previously Vaccinated	MultipleBoost	15	Hemagglutinin inhibition - A/Indonesia/05/2005 Antigen	DAY28	07FEB2011	56.5685425	11.3137085	1	1	Hemagglutinin inhibition	A/Indonesia/05/2005 Antigen	4.03545304448364	12.7196975077699	334267.72	Male	15	46	Non-Hispanic or Non-Latino	Yes	05	5
47FUR027	Multiple	Multiple (A)	9	9 (Day 56)	80059	Previously Vaccinated	MultipleBoost	15	Hemagglutinin inhibition - A/Indonesia/05/2005 Antigen	DAY56	07MAR2011	56.5685425	11.3137085	1	1	Hemagglutinin inhibition	A/Indonesia/05/2005 Antigen	4.03545304448364	12.7155986852024	332900.42	Male	15	46	Non-Hispanic or Non-Latino	Yes	09	3
47FUR027	Multiple	Multiple (A)	9	9 (Day 56)	80059	Previously Vaccinated	MultipleBoost	15	Hemagglutinin inhibition - A/Indonesia/05/2005 Antigen	DAY56	07MAR2011	56.5685425	11.3137085	1	1	Hemagglutinin inhibition	A/Indonesia/05/2005 Antigen	4.03545304448364	12.7210704038264	334726.95	Male	15	46	Non-Hispanic or Non-Latino	Yes	09	3
47FUR027	Multiple	Multiple (A)	9	9 (Day 56)	80059	Previously Vaccinated	MultipleBoost	15	Hemagglutinin inhibition - A/Indonesia/05/2005 Antigen	DAY56	07MAR2011	56.5685425	11.3137085	1	1	Hemagglutinin inhibition	A/Indonesia/05/2005 Antigen	4.03545304448364	12.8806407998887	392637	Male	15	46	Non-Hispanic or Non-Latino	Yes	09	4
47FUR027	Multiple	Multiple (A)	9	9 (Day 56)	80059	Previously Vaccinated	MultipleBoost	15	Hemagglutinin inhibition - A/Indonesia/05/2005 Antigen	DAY56	07MAR2011	56.5685425	11.3137085	1	1	Hemagglutinin inhibition	A/Indonesia/05/2005 Antigen	4.03545304448364	12.914042451185	405973.21	Male	15	46	Non-Hispanic or Non-Latino	Yes	09	1
47FUR027	Multiple	Multiple (A)	9	9 (Day 56)	80059	Previously Vaccinated	MultipleBoost	15	Hemagglutinin inhibition - A/Indonesia/05/2005 Antigen	DAY56	07MAR2011	56.5685425	11.3137085	1	1	Hemagglutinin inhibition	A/Indonesia/05/2005 Antigen	4.03545304448364	12.9419074552313	417444.74	Male	15	46	Non-Hispanic or Non-Latino	Yes	09	5
47FUR027	Multiple	Multiple (A)	9	9 (Day 56)	80059	Previously Vaccinated	MultipleBoost	15	Hemagglutinin inhibition - A/Indonesia/05/2005 Antigen	DAY56	07MAR2011	56.5685425	11.3137085	1	1	Hemagglutinin inhibition	A/Indonesia/05/2005 Antigen	4.03545304448364	12.9845621735244	435635.94	Male	15	46	Non-Hispanic or Non-Latino	Yes	09	4
47FUR027	Multiple	Multiple (A)	9	9 (Day 56)	80059	Previously Vaccinated	MultipleBoost	15	Hemagglutinin inhibition - A/Indonesia/05/2005 Antigen	DAY56	07MAR2011	56.5685425	11.3137085	1	1	Hemagglutinin inhibition	A/Indonesia/05/2005 Antigen	4.03545304448364	13.1298282061129	503746.38	Male	15	46	Non-Hispanic or Non-Latino	Yes	09	2
47FUR027	Multiple	Multiple (A)	9	9 (Day 56)	80059	Previously Vaccinated	MultipleBoost	15	Hemagglutinin inhibition - A/Indonesia/05/2005 Antigen	DAY56	07MAR2011	56.5685425	11.3137085	1	1	Hemagglutinin inhibition	A/Indonesia/05/2005 Antigen	4.03545304448364	13.1560364036367	517123.19	Male	15	46	Non-Hispanic or Non-Latino	Yes	09	1
47FUR027	Multiple	Multiple (A)	9	9 (Day 56)	80059	Previously Vaccinated	MultipleBoost	15	Hemagglutinin inhibition - A/Indonesia/05/2005 Antigen	DAY56	07MAR2011	56.5685425	11.3137085	1	1	Hemagglutinin inhibition	A/Indonesia/05/2005 Antigen	4.03545304448364	13.2786760669747	584595.87	Male	15	46	Non-Hispanic or Non-Latino	Yes	09	2
47FUR027	Multiple	Multiple (A)	9	9 (Day 56)	80059	Previously Vaccinated	MultipleBoost	15	Hemagglutinin inhibition - A/Indonesia/05/2005 Antigen	DAY56	07MAR2011	56.5685425	11.3137085	1	1	Hemagglutinin inhibition	A/Indonesia/05/2005 Antigen	4.03545304448364	12.4285267992644	249827.71	Male	15	46	Non-Hispanic or Non-Latino	Yes	09	5
47FUR030	Primed90	Primed (A)	1	1 (Day 0)	80059	Previously Vaccinated	PriorDoseHigh	90	Hemagglutinin inhibition - A/Indonesia/05/2005 Antigen	PREVAC	12JAN2011	5	.	0	.	Hemagglutinin inhibition	A/Indonesia/05/2005 Antigen	1.6094379124341	11.13394604386	68455.97	Female	90	62	Non-Hispanic or Non-Latino	Yes	01	4
47FUR030	Primed90	Primed (A)	1	1 (Day 0)	80059	Previously Vaccinated	PriorDoseHigh	90	Hemagglutinin inhibition - A/Indonesia/05/2005 Antigen	PREVAC	12JAN2011	5	.	0	.	Hemagglutinin inhibition	A/Indonesia/05/2005 Antigen	1.6094379124341	10.8302120627403	50524.42	Female	90	62	Non-Hispanic or Non-Latino	Yes	01	4
47FUR030	Primed90	Primed (A)	2	2 (Day 3)	80059	Previously Vaccinated	PriorDoseHigh	90	Hemagglutinin inhibition - A/Indonesia/05/2005 Antigen	DAY3	14JAN2011	5	1	0	0	Hemagglutinin inhibition	A/Indonesia/05/2005 Antigen	1.6094379124341	12.053548017963	171707.55	Female	90	62	Non-Hispanic or Non-Latino	Yes	02	4
47FUR030	Primed90	Primed (A)	2	2 (Day 3)	80059	Previously Vaccinated	PriorDoseHigh	90	Hemagglutinin inhibition - A/Indonesia/05/2005 Antigen	DAY3	14JAN2011	5	1	0	0	Hemagglutinin inhibition	A/Indonesia/05/2005 Antigen	1.6094379124341	10.9724585122241	58247.62	Female	90	62	Non-Hispanic or Non-Latino	Yes	02	4
47FUR030	Primed90	Primed (A)	3	3 (Day 7)	80059	Previously Vaccinated	PriorDoseHigh	90	Hemagglutinin inhibition - A/Indonesia/05/2005 Antigen	DAY7	20JAN2011	5	1	0	0	Hemagglutinin inhibition	A/Indonesia/05/2005 Antigen	1.6094379124341	12.7752878399514	353375.97	Female	90	62	Non-Hispanic or Non-Latino	Yes	03	4
47FUR030	Primed90	Primed (A)	3	3 (Day 7)	80059	Previously Vaccinated	PriorDoseHigh	90	Hemagglutinin inhibition - A/Indonesia/05/2005 Antigen	DAY7	20JAN2011	5	1	0	0	Hemagglutinin inhibition	A/Indonesia/05/2005 Antigen	1.6094379124341	12.3820768732874	238488.62	Female	90	62	Non-Hispanic or Non-Latino	Yes	03	4
47FUR030	Primed90	Primed (A)	4	4 (Day 14)	80059	Previously Vaccinated	PriorDoseHigh	90	Hemagglutinin inhibition - A/Indonesia/05/2005 Antigen	DAY14	26JAN2011	28.28427125	5.65685425	0	0	Hemagglutinin inhibition	A/Indonesia/05/2005 Antigen	3.34230586392369	13.1556673712445	516932.39	Female	90	62	Non-Hispanic or Non-Latino	Yes	04	4
47FUR030	Primed90	Primed (A)	4	4 (Day 14)	80059	Previously Vaccinated	PriorDoseHigh	90	Hemagglutinin inhibition - A/Indonesia/05/2005 Antigen	DAY14	26JAN2011	28.28427125	5.65685425	0	0	Hemagglutinin inhibition	A/Indonesia/05/2005 Antigen	3.34230586392369	12.8141439293949	367377.03	Female	90	62	Non-Hispanic or Non-Latino	Yes	04	4
47FUR030	Primed90	Primed (A)	9	9 (Day 56)	80059	Previously Vaccinated	PriorDoseHigh	90	Hemagglutinin inhibition - A/Indonesia/05/2005 Antigen	DAY56	09MAR2011	7.071067812	1.414213562	0	0	Hemagglutinin inhibition	A/Indonesia/05/2005 Antigen	1.95601150273309	12.1491287322127	188929.41	Female	90	62	Non-Hispanic or Non-Latino	Yes	09	4
47FUR030	Primed90	Primed (A)	9	9 (Day 56)	80059	Previously Vaccinated	PriorDoseHigh	90	Hemagglutinin inhibition - A/Indonesia/05/2005 Antigen	DAY56	09MAR2011	7.071067812	1.414213562	0	0	Hemagglutinin inhibition	A/Indonesia/05/2005 Antigen	1.95601150273309	11.76978537748	129286.4	Female	90	62	Non-Hispanic or Non-Latino	Yes	09	4
47FUR030	Primed90	Primed (A)	10	10 (Day 180 or 208)	80059	Previously Vaccinated	PriorDoseHigh	90	Hemagglutinin inhibition - A/Indonesia/05/2005 Antigen	DAY180	07JUL2011	5	1	0	0	Hemagglutinin inhibition	A/Indonesia/05/2005 Antigen	1.6094379124341	11.4681089404272	95617.29	Female	90	62	Non-Hispanic or Non-Latino	Yes	10	4
47FUR030	Primed90	Primed (A)	10	10 (Day 180 or 208)	80059	Previously Vaccinated	PriorDoseHigh	90	Hemagglutinin inhibition - A/Indonesia/05/2005 Antigen	DAY180	07JUL2011	5	1	0	0	Hemagglutinin inhibition	A/Indonesia/05/2005 Antigen	1.6094379124341	10.9527796866146	57112.58	Female	90	62	Non-Hispanic or Non-Latino	Yes	10	4
47FUR031	Primed90	Primed (A)	1	1 (Day 0)	80059	Previously Vaccinated	PriorDoseLow	90	Hemagglutinin inhibition - A/Indonesia/05/2005 Antigen	PREVAC	17JAN2011	5	.	0	.	Hemagglutinin inhibition	A/Indonesia/05/2005 Antigen	1.6094379124341	11.7160640853262	122524.23	Female	90	44	Non-Hispanic or Non-Latino	Yes	01	1
47FUR031	Primed90	Primed (A)	1	1 (Day 0)	80059	Previously Vaccinated	PriorDoseLow	90	Hemagglutinin inhibition - A/Indonesia/05/2005 Antigen	PREVAC	17JAN2011	5	.	0	.	Hemagglutinin inhibition	A/Indonesia/05/2005 Antigen	1.6094379124341	11.463610843297	95188.16	Female	90	44	Non-Hispanic or Non-Latino	Yes	01	1
47FUR031	Primed90	Primed (A)	2	2 (Day 3)	80059	Previously Vaccinated	PriorDoseLow	90	Hemagglutinin inhibition - A/Indonesia/05/2005 Antigen	DAY3	19JAN2011	5	1	0	0	Hemagglutinin inhibition	A/Indonesia/05/2005 Antigen	1.6094379124341	11.5347652315746	102208	Female	90	44	Non-Hispanic or Non-Latino	Yes	02	1
47FUR031	Primed90	Primed (A)	2	2 (Day 3)	80059	Previously Vaccinated	PriorDoseLow	90	Hemagglutinin inhibition - A/Indonesia/05/2005 Antigen	DAY3	19JAN2011	5	1	0	0	Hemagglutinin inhibition	A/Indonesia/05/2005 Antigen	1.6094379124341	11.3062381391667	81327.39	Female	90	44	Non-Hispanic or Non-Latino	Yes	02	1
47FUR031	Primed90	Primed (A)	3	3 (Day 7)	80059	Previously Vaccinated	PriorDoseLow	90	Hemagglutinin inhibition - A/Indonesia/05/2005 Antigen	DAY7	24JAN2011	28.28427125	5.65685425	0	0	Hemagglutinin inhibition	A/Indonesia/05/2005 Antigen	3.34230586392369	12.749390715649	344342.03	Female	90	44	Non-Hispanic or Non-Latino	Yes	03	1
47FUR031	Primed90	Primed (A)	3	3 (Day 7)	80059	Previously Vaccinated	PriorDoseLow	90	Hemagglutinin inhibition - A/Indonesia/05/2005 Antigen	DAY7	24JAN2011	28.28427125	5.65685425	0	0	Hemagglutinin inhibition	A/Indonesia/05/2005 Antigen	3.34230586392369	12.4668463380161	259586.78	Female	90	44	Non-Hispanic or Non-Latino	Yes	03	1
47FUR031	Primed90	Primed (A)	4	4 (Day 14)	80059	Previously Vaccinated	PriorDoseLow	90	Hemagglutinin inhibition - A/Indonesia/05/2005 Antigen	DAY14	31JAN2011	113.137085	22.627417	1	1	Hemagglutinin inhibition	A/Indonesia/05/2005 Antigen	4.72860022504359	13.5662634156601	779387.33	Female	90	44	Non-Hispanic or Non-Latino	Yes	04	1
47FUR031	Primed90	Primed (A)	4	4 (Day 14)	80059	Previously Vaccinated	PriorDoseLow	90	Hemagglutinin inhibition - A/Indonesia/05/2005 Antigen	DAY14	31JAN2011	113.137085	22.627417	1	1	Hemagglutinin inhibition	A/Indonesia/05/2005 Antigen	4.72860022504359	13.4034929289033	662312.6	Female	90	44	Non-Hispanic or Non-Latino	Yes	04	1
47FUR031	Primed90	Primed (A)	5	5 (Day 28)	80059	Previously Vaccinated	PriorDoseLow	90	Hemagglutinin inhibition - A/Indonesia/05/2005 Antigen	DAY28	14FEB2011	80	16	1	1	Hemagglutinin inhibition	A/Indonesia/05/2005 Antigen	4.38202663467388	13.3361174976516	619159.07	Female	90	44	Non-Hispanic or Non-Latino	Yes	05	1
47FUR031	Primed90	Primed (A)	5	5 (Day 28)	80059	Previously Vaccinated	PriorDoseLow	90	Hemagglutinin inhibition - A/Indonesia/05/2005 Antigen	DAY28	14FEB2011	80	16	1	1	Hemagglutinin inhibition	A/Indonesia/05/2005 Antigen	4.38202663467388	13.1817812101672	530609.28	Female	90	44	Non-Hispanic or Non-Latino	Yes	05	1
47FUR031	Primed90	Primed (A)	9	9 (Day 56)	80059	Previously Vaccinated	PriorDoseLow	90	Hemagglutinin inhibition - A/Indonesia/05/2005 Antigen	DAY56	14MAR2011	56.5685425	11.3137085	1	1	Hemagglutinin inhibition	A/Indonesia/05/2005 Antigen	4.03545304448364	13.4652130491725	704478.47	Female	90	44	Non-Hispanic or Non-Latino	Yes	09	1
47FUR031	Primed90	Primed (A)	9	9 (Day 56)	80059	Previously Vaccinated	PriorDoseLow	90	Hemagglutinin inhibition - A/Indonesia/05/2005 Antigen	DAY56	14MAR2011	56.5685425	11.3137085	1	1	Hemagglutinin inhibition	A/Indonesia/05/2005 Antigen	4.03545304448364	12.9543352767233	422665.04	Female	90	44	Non-Hispanic or Non-Latino	Yes	09	1
47FUR031	Primed90	Primed (A)	10	10 (Day 180 or 208)	80059	Previously Vaccinated	PriorDoseLow	90	Hemagglutinin inhibition - A/Indonesia/05/2005 Antigen	DAY180	11JUL2011	20	4	0	0	Hemagglutinin inhibition	A/Indonesia/05/2005 Antigen	2.99573227355399	12.9796004074471	433479.77	Female	90	44	Non-Hispanic or Non-Latino	Yes	10	1
47FUR031	Primed90	Primed (A)	10	10 (Day 180 or 208)	80059	Previously Vaccinated	PriorDoseLow	90	Hemagglutinin inhibition - A/Indonesia/05/2005 Antigen	DAY180	11JUL2011	20	4	0	0	Hemagglutinin inhibition	A/Indonesia/05/2005 Antigen	2.99573227355399	12.8329505280219	374351.52	Female	90	44	Non-Hispanic or Non-Latino	Yes	10	1
47FUR033	Primed15	Primed (A)	1	1 (Day 0)	80059	Previously Vaccinated	PriorDoseHigh	15	Hemagglutinin inhibition - A/Indonesia/05/2005 Antigen	PREVAC	18JAN2011	5	.	0	.	Hemagglutinin inhibition	A/Indonesia/05/2005 Antigen	1.6094379124341	11.855535895702	140861.99	Male	15	61	Non-Hispanic or Non-Latino	Yes	01	3
47FUR033	Primed15	Primed (A)	1	1 (Day 0)	80059	Previously Vaccinated	PriorDoseHigh	15	Hemagglutinin inhibition - A/Indonesia/05/2005 Antigen	PREVAC	18JAN2011	5	.	0	.	Hemagglutinin inhibition	A/Indonesia/05/2005 Antigen	1.6094379124341	11.7615442298798	128225.31	Male	15	61	Non-Hispanic or Non-Latino	Yes	01	3
47FUR033	Primed15	Primed (A)	2	2 (Day 3)	80059	Previously Vaccinated	PriorDoseHigh	15	Hemagglutinin inhibition - A/Indonesia/05/2005 Antigen	DAY3	21JAN2011	5	1	0	0	Hemagglutinin inhibition	A/Indonesia/05/2005 Antigen	1.6094379124341	12.5746781761424	289143.44	Male	15	61	Non-Hispanic or Non-Latino	Yes	02	3
47FUR033	Primed15	Primed (A)	2	2 (Day 3)	80059	Previously Vaccinated	PriorDoseHigh	15	Hemagglutinin inhibition - A/Indonesia/05/2005 Antigen	DAY3	21JAN2011	5	1	0	0	Hemagglutinin inhibition	A/Indonesia/05/2005 Antigen	1.6094379124341	12.1802294174856	194897.57	Male	15	61	Non-Hispanic or Non-Latino	Yes	02	3
47FUR033	Primed15	Primed (A)	3	3 (Day 7)	80059	Previously Vaccinated	PriorDoseHigh	15	Hemagglutinin inhibition - A/Indonesia/05/2005 Antigen	DAY7	25JAN2011	5	1	0	0	Hemagglutinin inhibition	A/Indonesia/05/2005 Antigen	1.6094379124341	12.1645666150273	191868.71	Male	15	61	Non-Hispanic or Non-Latino	Yes	03	3
47FUR033	Primed15	Primed (A)	3	3 (Day 7)	80059	Previously Vaccinated	PriorDoseHigh	15	Hemagglutinin inhibition - A/Indonesia/05/2005 Antigen	DAY7	25JAN2011	5	1	0	0	Hemagglutinin inhibition	A/Indonesia/05/2005 Antigen	1.6094379124341	11.8280252871095	137039.61	Male	15	61	Non-Hispanic or Non-Latino	Yes	03	3
47FUR033	Primed15	Primed (A)	4	4 (Day 14)	80059	Previously Vaccinated	PriorDoseHigh	15	Hemagglutinin inhibition - A/Indonesia/05/2005 Antigen	DAY14	31JAN2011	5	1	0	0	Hemagglutinin inhibition	A/Indonesia/05/2005 Antigen	1.6094379124341	11.8528774972165	140488.02	Male	15	61	Non-Hispanic or Non-Latino	Yes	04	3
47FUR033	Primed15	Primed (A)	4	4 (Day 14)	80059	Previously Vaccinated	PriorDoseHigh	15	Hemagglutinin inhibition - A/Indonesia/05/2005 Antigen	DAY14	31JAN2011	5	1	0	0	Hemagglutinin inhibition	A/Indonesia/05/2005 Antigen	1.6094379124341	12.0452933784125	170296	Male	15	61	Non-Hispanic or Non-Latino	Yes	04	3
47FUR033	Primed15	Primed (A)	5	5 (Day 28)	80059	Previously Vaccinated	PriorDoseHigh	15	Hemagglutinin inhibition - A/Indonesia/05/2005 Antigen	DAY28	16FEB2011	5	1	0	0	Hemagglutinin inhibition	A/Indonesia/05/2005 Antigen	1.6094379124341	12.1387475254295	186978.24	Male	15	61	Non-Hispanic or Non-Latino	Yes	05	3
47FUR033	Primed15	Primed (A)	5	5 (Day 28)	80059	Previously Vaccinated	PriorDoseHigh	15	Hemagglutinin inhibition - A/Indonesia/05/2005 Antigen	DAY28	16FEB2011	5	1	0	0	Hemagglutinin inhibition	A/Indonesia/05/2005 Antigen	1.6094379124341	12.1082392300424	181359.99	Male	15	61	Non-Hispanic or Non-Latino	Yes	05	3
47FUR033	Primed15	Primed (A)	9	9 (Day 56)	80059	Previously Vaccinated	PriorDoseHigh	15	Hemagglutinin inhibition - A/Indonesia/05/2005 Antigen	DAY56	16MAR2011	5	1	0	0	Hemagglutinin inhibition	A/Indonesia/05/2005 Antigen	1.6094379124341	11.8924235287447	146155.08	Male	15	61	Non-Hispanic or Non-Latino	Yes	09	3
47FUR033	Primed15	Primed (A)	9	9 (Day 56)	80059	Previously Vaccinated	PriorDoseHigh	15	Hemagglutinin inhibition - A/Indonesia/05/2005 Antigen	DAY56	16MAR2011	5	1	0	0	Hemagglutinin inhibition	A/Indonesia/05/2005 Antigen	1.6094379124341	11.5142450938768	100132.05	Male	15	61	Non-Hispanic or Non-Latino	Yes	09	3
47FUR033	Primed15	Primed (A)	10	10 (Day 180 or 208)	80059	Previously Vaccinated	PriorDoseHigh	15	Hemagglutinin inhibition - A/Indonesia/05/2005 Antigen	DAY180	12JUL2011	5	1	0	0	Hemagglutinin inhibition	A/Indonesia/05/2005 Antigen	1.6094379124341	11.7804266666007	130669.52	Male	15	61	Non-Hispanic or Non-Latino	Yes	10	3
47FUR033	Primed15	Primed (A)	10	10 (Day 180 or 208)	80059	Previously Vaccinated	PriorDoseHigh	15	Hemagglutinin inhibition - A/Indonesia/05/2005 Antigen	DAY180	12JUL2011	5	1	0	0	Hemagglutinin inhibition	A/Indonesia/05/2005 Antigen	1.6094379124341	11.3992145146092	89251.59	Male	15	61	Non-Hispanic or Non-Latino	Yes	10	3
47FUR034	Multiple	Multiple (A)	1	1 (Day 0)	80059	Previously Vaccinated	MultipleBoost	15	Hemagglutinin inhibition - A/Indonesia/05/2005 Antigen	PREVAC	19JAN2011	7.071067812	.	0	.	Hemagglutinin inhibition	A/Indonesia/05/2005 Antigen	1.95601150273309	12.5337708959192	277554.03	Male	15	53	Non-Hispanic or Non-Latino	Yes	01	2
47FUR034	Multiple	Multiple (A)	1	1 (Day 0)	80059	Previously Vaccinated	MultipleBoost	15	Hemagglutinin inhibition - A/Indonesia/05/2005 Antigen	PREVAC	19JAN2011	7.071067812	.	0	.	Hemagglutinin inhibition	A/Indonesia/05/2005 Antigen	1.95601150273309	12.2553163258932	210095.26	Male	15	53	Non-Hispanic or Non-Latino	Yes	01	2
47FUR034	Multiple	Multiple (A)	2	2 (Day 3)	80059	Previously Vaccinated	MultipleBoost	15	Hemagglutinin inhibition - A/Indonesia/05/2005 Antigen	DAY3	21JAN2011	7.071067812	1	0	0	Hemagglutinin inhibition	A/Indonesia/05/2005 Antigen	1.95601150273309	12.1668326281905	192303.98	Male	15	53	Non-Hispanic or Non-Latino	Yes	02	2
47FUR034	Multiple	Multiple (A)	2	2 (Day 3)	80059	Previously Vaccinated	MultipleBoost	15	Hemagglutinin inhibition - A/Indonesia/05/2005 Antigen	DAY3	21JAN2011	7.071067812	1	0	0	Hemagglutinin inhibition	A/Indonesia/05/2005 Antigen	1.95601150273309	11.8718286645025	143175.82	Male	15	53	Non-Hispanic or Non-Latino	Yes	02	2
47FUR034	Multiple	Multiple (A)	3	3 (Day 7)	80059	Previously Vaccinated	MultipleBoost	15	Hemagglutinin inhibition - A/Indonesia/05/2005 Antigen	DAY7	27JAN2011	28.28427125	4	0	0	Hemagglutinin inhibition	A/Indonesia/05/2005 Antigen	3.34230586392369	13.2573567508139	572264.6	Male	15	53	Non-Hispanic or Non-Latino	Yes	03	2
47FUR034	Multiple	Multiple (A)	3	3 (Day 7)	80059	Previously Vaccinated	MultipleBoost	15	Hemagglutinin inhibition - A/Indonesia/05/2005 Antigen	DAY7	27JAN2011	28.28427125	4	0	0	Hemagglutinin inhibition	A/Indonesia/05/2005 Antigen	3.34230586392369	13.1828631349549	531183.67	Male	15	53	Non-Hispanic or Non-Latino	Yes	03	2
47FUR034	Multiple	Multiple (A)	4	4 (Day 14)	80059	Previously Vaccinated	MultipleBoost	15	Hemagglutinin inhibition - A/Indonesia/05/2005 Antigen	DAY14	03FEB2011	56.5685425	8	1	1	Hemagglutinin inhibition	A/Indonesia/05/2005 Antigen	4.03545304448364	13.6453225312671	843506.2	Male	15	53	Non-Hispanic or Non-Latino	Yes	04	2
47FUR034	Multiple	Multiple (A)	4	4 (Day 14)	80059	Previously Vaccinated	MultipleBoost	15	Hemagglutinin inhibition - A/Indonesia/05/2005 Antigen	DAY14	03FEB2011	56.5685425	8	1	1	Hemagglutinin inhibition	A/Indonesia/05/2005 Antigen	4.03545304448364	13.6112496398029	815249.63	Male	15	53	Non-Hispanic or Non-Latino	Yes	04	2
47FUR034	Multiple	Multiple (A)	9	9 (Day 56)	80059	Previously Vaccinated	MultipleBoost	15	Hemagglutinin inhibition - A/Indonesia/05/2005 Antigen	DAY56	18MAR2011	56.5685425	8	1	1	Hemagglutinin inhibition	A/Indonesia/05/2005 Antigen	4.03545304448364	13.4930670746086	724376.87	Male	15	53	Non-Hispanic or Non-Latino	Yes	09	2
47FUR034	Multiple	Multiple (A)	9	9 (Day 56)	80059	Previously Vaccinated	MultipleBoost	15	Hemagglutinin inhibition - A/Indonesia/05/2005 Antigen	DAY56	18MAR2011	56.5685425	8	1	1	Hemagglutinin inhibition	A/Indonesia/05/2005 Antigen	4.03545304448364	13.1626090458806	520533.25	Male	15	53	Non-Hispanic or Non-Latino	Yes	09	2
47FUR034	Multiple	Multiple (A)	10	10 (Day 180 or 208)	80059	Previously Vaccinated	MultipleBoost	15	Hemagglutinin inhibition - A/Indonesia/05/2005 Antigen	DAY180	11JUL2011	40	5.65685425	1	1	Hemagglutinin inhibition	A/Indonesia/05/2005 Antigen	3.68887945411393	13.5822143423288	791918.96	Male	15	53	Non-Hispanic or Non-Latino	Yes	10	2
47FUR034	Multiple	Multiple (A)	10	10 (Day 180 or 208)	80059	Previously Vaccinated	MultipleBoost	15	Hemagglutinin inhibition - A/Indonesia/05/2005 Antigen	DAY180	11JUL2011	40	5.65685425	1	1	Hemagglutinin inhibition	A/Indonesia/05/2005 Antigen	3.68887945411393	13.514721482809	740233.89	Male	15	53	Non-Hispanic or Non-Latino	Yes	10	2
47FUR035	Primed15	Primed (A)	1	1 (Day 0)	80059	Previously Vaccinated	PriorDoseLow	15	Hemagglutinin inhibition - A/Indonesia/05/2005 Antigen	PREVAC	20JAN2011	5	.	0	.	Hemagglutinin inhibition	A/Indonesia/05/2005 Antigen	1.6094379124341	10.3955168265388	32712.64	Male	15	61	Non-Hispanic or Non-Latino	Yes	01	4
47FUR035	Primed15	Primed (A)	1	1 (Day 0)	80059	Previously Vaccinated	PriorDoseLow	15	Hemagglutinin inhibition - A/Indonesia/05/2005 Antigen	PREVAC	20JAN2011	5	.	0	.	Hemagglutinin inhibition	A/Indonesia/05/2005 Antigen	1.6094379124341	9.52634893428634	13716.42	Male	15	61	Non-Hispanic or Non-Latino	Yes	01	4
47FUR035	Primed15	Primed (A)	2	2 (Day 3)	80059	Previously Vaccinated	PriorDoseLow	15	Hemagglutinin inhibition - A/Indonesia/05/2005 Antigen	DAY3	24JAN2011	5	1	0	0	Hemagglutinin inhibition	A/Indonesia/05/2005 Antigen	1.6094379124341	10.7527857680212	46760.11	Male	15	61	Non-Hispanic or Non-Latino	Yes	02	4
47FUR035	Primed15	Primed (A)	2	2 (Day 3)	80059	Previously Vaccinated	PriorDoseLow	15	Hemagglutinin inhibition - A/Indonesia/05/2005 Antigen	DAY3	24JAN2011	5	1	0	0	Hemagglutinin inhibition	A/Indonesia/05/2005 Antigen	1.6094379124341	10.5676906143978	38858.83	Male	15	61	Non-Hispanic or Non-Latino	Yes	02	4
47FUR035	Primed15	Primed (A)	3	3 (Day 7)	80059	Previously Vaccinated	PriorDoseLow	15	Hemagglutinin inhibition - A/Indonesia/05/2005 Antigen	DAY7	27JAN2011	7.071067812	1.414213562	0	0	Hemagglutinin inhibition	A/Indonesia/05/2005 Antigen	1.95601150273309	11.488690762523	97605.66	Male	15	61	Non-Hispanic or Non-Latino	Yes	03	4
47FUR035	Primed15	Primed (A)	3	3 (Day 7)	80059	Previously Vaccinated	PriorDoseLow	15	Hemagglutinin inhibition - A/Indonesia/05/2005 Antigen	DAY7	27JAN2011	7.071067812	1.414213562	0	0	Hemagglutinin inhibition	A/Indonesia/05/2005 Antigen	1.95601150273309	10.7418889565493	46253.34	Male	15	61	Non-Hispanic or Non-Latino	Yes	03	4
47FUR035	Primed15	Primed (A)	4	4 (Day 14)	80059	Previously Vaccinated	PriorDoseLow	15	Hemagglutinin inhibition - A/Indonesia/05/2005 Antigen	DAY14	10FEB2011	47.5682846	9.51365692	1	1	Hemagglutinin inhibition	A/Indonesia/05/2005 Antigen	3.86216624925163	12.4287039856866	249871.98	Male	15	61	Non-Hispanic or Non-Latino	Yes	04	4
47FUR035	Primed15	Primed (A)	4	4 (Day 14)	80059	Previously Vaccinated	PriorDoseLow	15	Hemagglutinin inhibition - A/Indonesia/05/2005 Antigen	DAY14	10FEB2011	47.5682846	9.51365692	1	1	Hemagglutinin inhibition	A/Indonesia/05/2005 Antigen	3.86216624925163	12.04800649357	170758.66	Male	15	61	Non-Hispanic or Non-Latino	Yes	04	4
47FUR035	Primed15	Primed (A)	5	5 (Day 28)	80059	Previously Vaccinated	PriorDoseLow	15	Hemagglutinin inhibition - A/Indonesia/05/2005 Antigen	DAY28	15FEB2011	40	8	1	1	Hemagglutinin inhibition	A/Indonesia/05/2005 Antigen	3.68887945411393	12.4350186102372	251454.82	Male	15	61	Non-Hispanic or Non-Latino	Yes	05	4
47FUR035	Primed15	Primed (A)	5	5 (Day 28)	80059	Previously Vaccinated	PriorDoseLow	15	Hemagglutinin inhibition - A/Indonesia/05/2005 Antigen	DAY28	15FEB2011	40	8	1	1	Hemagglutinin inhibition	A/Indonesia/05/2005 Antigen	3.68887945411393	12.0546526007898	171897.32	Male	15	61	Non-Hispanic or Non-Latino	Yes	05	4
47FUR035	Primed15	Primed (A)	9	9 (Day 56)	80059	Previously Vaccinated	PriorDoseLow	15	Hemagglutinin inhibition - A/Indonesia/05/2005 Antigen	DAY56	15MAR2011	28.28427125	5.65685425	0	0	Hemagglutinin inhibition	A/Indonesia/05/2005 Antigen	3.34230586392369	12.1148622650516	182565.13	Male	15	61	Non-Hispanic or Non-Latino	Yes	09	4
47FUR035	Primed15	Primed (A)	9	9 (Day 56)	80059	Previously Vaccinated	PriorDoseLow	15	Hemagglutinin inhibition - A/Indonesia/05/2005 Antigen	DAY56	15MAR2011	28.28427125	5.65685425	0	0	Hemagglutinin inhibition	A/Indonesia/05/2005 Antigen	3.34230586392369	11.6931033924984	119743.04	Male	15	61	Non-Hispanic or Non-Latino	Yes	09	4
47FUR035	Primed15	Primed (A)	10	10 (Day 180 or 208)	80059	Previously Vaccinated	PriorDoseLow	15	Hemagglutinin inhibition - A/Indonesia/05/2005 Antigen	DAY180	12JUL2011	7.071067812	1.414213562	0	0	Hemagglutinin inhibition	A/Indonesia/05/2005 Antigen	1.95601150273309	11.5135896443542	100066.44	Male	15	61	Non-Hispanic or Non-Latino	Yes	10	4
47FUR035	Primed15	Primed (A)	10	10 (Day 180 or 208)	80059	Previously Vaccinated	PriorDoseLow	15	Hemagglutinin inhibition - A/Indonesia/05/2005 Antigen	DAY180	12JUL2011	7.071067812	1.414213562	0	0	Hemagglutinin inhibition	A/Indonesia/05/2005 Antigen	1.95601150273309	11.1347844796002	68513.39	Male	15	61	Non-Hispanic or Non-Latino	Yes	10	4
47FUR036	Primed90	Primed (A)	1	1 (Day 0)	80059	Previously Vaccinated	PriorDoseHigh	90	Hemagglutinin inhibition - A/Indonesia/05/2005 Antigen	PREVAC	24JAN2011	5	.	0	.	Hemagglutinin inhibition	A/Indonesia/05/2005 Antigen	1.6094379124341	11.0608844968107	63632.81	Male	90	47	Non-Hispanic or Non-Latino	Yes	01	2
47FUR036	Primed90	Primed (A)	1	1 (Day 0)	80059	Previously Vaccinated	PriorDoseHigh	90	Hemagglutinin inhibition - A/Indonesia/05/2005 Antigen	PREVAC	24JAN2011	5	.	0	.	Hemagglutinin inhibition	A/Indonesia/05/2005 Antigen	1.6094379124341	10.8807189033531	53141.79	Male	90	47	Non-Hispanic or Non-Latino	Yes	01	2
47FUR036	Primed90	Primed (A)	2	2 (Day 3)	80059	Previously Vaccinated	PriorDoseHigh	90	Hemagglutinin inhibition - A/Indonesia/05/2005 Antigen	DAY3	27JAN2011	5	1	0	0	Hemagglutinin inhibition	A/Indonesia/05/2005 Antigen	1.6094379124341	11.1843020853251	71991.41	Male	90	47	Non-Hispanic or Non-Latino	Yes	02	2
47FUR036	Primed90	Primed (A)	2	2 (Day 3)	80059	Previously Vaccinated	PriorDoseHigh	90	Hemagglutinin inhibition - A/Indonesia/05/2005 Antigen	DAY3	27JAN2011	5	1	0	0	Hemagglutinin inhibition	A/Indonesia/05/2005 Antigen	1.6094379124341	11.0381895360364	62204.93	Male	90	47	Non-Hispanic or Non-Latino	Yes	02	2
47FUR036	Primed90	Primed (A)	3	3 (Day 7)	80059	Previously Vaccinated	PriorDoseHigh	90	Hemagglutinin inhibition - A/Indonesia/05/2005 Antigen	DAY7	01FEB2011	20	4	0	0	Hemagglutinin inhibition	A/Indonesia/05/2005 Antigen	2.99573227355399	12.6075196585622	298796.99	Male	90	47	Non-Hispanic or Non-Latino	Yes	03	2
47FUR036	Primed90	Primed (A)	3	3 (Day 7)	80059	Previously Vaccinated	PriorDoseHigh	90	Hemagglutinin inhibition - A/Indonesia/05/2005 Antigen	DAY7	01FEB2011	20	4	0	0	Hemagglutinin inhibition	A/Indonesia/05/2005 Antigen	2.99573227355399	12.4578357620243	257258.26	Male	90	47	Non-Hispanic or Non-Latino	Yes	03	2
47FUR036	Primed90	Primed (A)	4	4 (Day 14)	80059	Previously Vaccinated	PriorDoseHigh	90	Hemagglutinin inhibition - A/Indonesia/05/2005 Antigen	DAY14	08FEB2011	40	8	1	1	Hemagglutinin inhibition	A/Indonesia/05/2005 Antigen	3.68887945411393	12.9850051517859	435828.96	Male	90	47	Non-Hispanic or Non-Latino	Yes	04	2
47FUR036	Primed90	Primed (A)	4	4 (Day 14)	80059	Previously Vaccinated	PriorDoseHigh	90	Hemagglutinin inhibition - A/Indonesia/05/2005 Antigen	DAY14	08FEB2011	40	8	1	1	Hemagglutinin inhibition	A/Indonesia/05/2005 Antigen	3.68887945411393	12.7830053970268	356113.72	Male	90	47	Non-Hispanic or Non-Latino	Yes	04	2
47FUR036	Primed90	Primed (A)	5	5 (Day 28)	80059	Previously Vaccinated	PriorDoseHigh	90	Hemagglutinin inhibition - A/Indonesia/05/2005 Antigen	DAY28	21FEB2011	20	4	0	0	Hemagglutinin inhibition	A/Indonesia/05/2005 Antigen	2.99573227355399	12.7067788401466	329977.2	Male	90	47	Non-Hispanic or Non-Latino	Yes	05	2
47FUR036	Primed90	Primed (A)	5	5 (Day 28)	80059	Previously Vaccinated	PriorDoseHigh	90	Hemagglutinin inhibition - A/Indonesia/05/2005 Antigen	DAY28	21FEB2011	20	4	0	0	Hemagglutinin inhibition	A/Indonesia/05/2005 Antigen	2.99573227355399	12.6166267493725	301530.59	Male	90	47	Non-Hispanic or Non-Latino	Yes	05	2
47FUR036	Primed90	Primed (A)	9	9 (Day 56)	80059	Previously Vaccinated	PriorDoseHigh	90	Hemagglutinin inhibition - A/Indonesia/05/2005 Antigen	DAY56	22MAR2011	25.198421	5.0396842	0	0	Hemagglutinin inhibition	A/Indonesia/05/2005 Antigen	3.22678133382407	11.8254672092279	136689.5	Male	90	47	Non-Hispanic or Non-Latino	Yes	09	2
47FUR036	Primed90	Primed (A)	9	9 (Day 56)	80059	Previously Vaccinated	PriorDoseHigh	90	Hemagglutinin inhibition - A/Indonesia/05/2005 Antigen	DAY56	22MAR2011	25.198421	5.0396842	0	0	Hemagglutinin inhibition	A/Indonesia/05/2005 Antigen	3.22678133382407	11.9791086179817	159389.89	Male	90	47	Non-Hispanic or Non-Latino	Yes	09	2
47FUR036	Primed90	Primed (A)	10	10 (Day 180 or 208)	80059	Previously Vaccinated	PriorDoseHigh	90	Hemagglutinin inhibition - A/Indonesia/05/2005 Antigen	DAY180	20JUL2011	7.071067812	1.414213562	0	0	Hemagglutinin inhibition	A/Indonesia/05/2005 Antigen	1.95601150273309	11.9630212413837	156846.24	Male	90	47	Non-Hispanic or Non-Latino	Yes	10	2
47FUR036	Primed90	Primed (A)	10	10 (Day 180 or 208)	80059	Previously Vaccinated	PriorDoseHigh	90	Hemagglutinin inhibition - A/Indonesia/05/2005 Antigen	DAY180	20JUL2011	7.071067812	1.414213562	0	0	Hemagglutinin inhibition	A/Indonesia/05/2005 Antigen	1.95601150273309	11.8402297324706	138722.35	Male	90	47	Non-Hispanic or Non-Latino	Yes	10	2
47FUR037	Multiple	Multiple (A)	1	1 (Day 0)	80059	Previously Vaccinated	MultipleBoost	15	Hemagglutinin inhibition - A/Indonesia/05/2005 Antigen	PREVAC	24JAN2011	5	.	0	.	Hemagglutinin inhibition	A/Indonesia/05/2005 Antigen	1.6094379124341	12.0550332207256	171962.76	Male	15	48	Non-Hispanic or Non-Latino	Yes	01	3
47FUR037	Multiple	Multiple (A)	1	1 (Day 0)	80059	Previously Vaccinated	MultipleBoost	15	Hemagglutinin inhibition - A/Indonesia/05/2005 Antigen	PREVAC	24JAN2011	5	.	0	.	Hemagglutinin inhibition	A/Indonesia/05/2005 Antigen	1.6094379124341	11.8360062203372	138137.69	Male	15	48	Non-Hispanic or Non-Latino	Yes	01	3
47FUR037	Multiple	Multiple (A)	2	2 (Day 3)	80059	Previously Vaccinated	MultipleBoost	15	Hemagglutinin inhibition - A/Indonesia/05/2005 Antigen	DAY3	27JAN2011	5	1	0	0	Hemagglutinin inhibition	A/Indonesia/05/2005 Antigen	1.6094379124341	12.2365704727691	206193.53	Male	15	48	Non-Hispanic or Non-Latino	Yes	02	3
47FUR037	Multiple	Multiple (A)	2	2 (Day 3)	80059	Previously Vaccinated	MultipleBoost	15	Hemagglutinin inhibition - A/Indonesia/05/2005 Antigen	DAY3	27JAN2011	5	1	0	0	Hemagglutinin inhibition	A/Indonesia/05/2005 Antigen	1.6094379124341	12.0026559833499	163187.64	Male	15	48	Non-Hispanic or Non-Latino	Yes	02	3
47FUR037	Multiple	Multiple (A)	3	3 (Day 7)	80059	Previously Vaccinated	MultipleBoost	15	Hemagglutinin inhibition - A/Indonesia/05/2005 Antigen	DAY7	31JAN2011	5	1	0	0	Hemagglutinin inhibition	A/Indonesia/05/2005 Antigen	1.6094379124341	12.2310109352565	205050.37	Male	15	48	Non-Hispanic or Non-Latino	Yes	03	3
47FUR037	Multiple	Multiple (A)	3	3 (Day 7)	80059	Previously Vaccinated	MultipleBoost	15	Hemagglutinin inhibition - A/Indonesia/05/2005 Antigen	DAY7	31JAN2011	5	1	0	0	Hemagglutinin inhibition	A/Indonesia/05/2005 Antigen	1.6094379124341	11.9359261226909	152653.53	Male	15	48	Non-Hispanic or Non-Latino	Yes	03	3
47FUR037	Multiple	Multiple (A)	4	4 (Day 14)	80059	Previously Vaccinated	MultipleBoost	15	Hemagglutinin inhibition - A/Indonesia/05/2005 Antigen	DAY14	07FEB2011	10	2	0	0	Hemagglutinin inhibition	A/Indonesia/05/2005 Antigen	2.30258509299404	12.707744652482	330296.05	Male	15	48	Non-Hispanic or Non-Latino	Yes	04	3
47FUR037	Multiple	Multiple (A)	4	4 (Day 14)	80059	Previously Vaccinated	MultipleBoost	15	Hemagglutinin inhibition - A/Indonesia/05/2005 Antigen	DAY14	07FEB2011	10	2	0	0	Hemagglutinin inhibition	A/Indonesia/05/2005 Antigen	2.30258509299404	12.3596383114129	233196.87	Male	15	48	Non-Hispanic or Non-Latino	Yes	04	3
47FUR037	Multiple	Multiple (A)	5	5 (Day 28)	80059	Previously Vaccinated	MultipleBoost	15	Hemagglutinin inhibition - A/Indonesia/05/2005 Antigen	DAY28	21FEB2011	7.071067812	1.414213562	0	0	Hemagglutinin inhibition	A/Indonesia/05/2005 Antigen	1.95601150273309	12.6914598694255	324960.81	Male	15	48	Non-Hispanic or Non-Latino	Yes	05	3
47FUR037	Multiple	Multiple (A)	5	5 (Day 28)	80059	Previously Vaccinated	MultipleBoost	15	Hemagglutinin inhibition - A/Indonesia/05/2005 Antigen	DAY28	21FEB2011	7.071067812	1.414213562	0	0	Hemagglutinin inhibition	A/Indonesia/05/2005 Antigen	1.95601150273309	12.488200471674	265189.64	Male	15	48	Non-Hispanic or Non-Latino	Yes	05	3
47FUR037	Multiple	Multiple (A)	9	9 (Day 56)	80059	Previously Vaccinated	MultipleBoost	15	Hemagglutinin inhibition - A/Indonesia/05/2005 Antigen	DAY56	21MAR2011	7.071067812	1.414213562	0	0	Hemagglutinin inhibition	A/Indonesia/05/2005 Antigen	1.95601150273309	13.9288392432712	1120000	Male	15	48	Non-Hispanic or Non-Latino	Yes	09	3
47FUR037	Multiple	Multiple (A)	9	9 (Day 56)	80059	Previously Vaccinated	MultipleBoost	15	Hemagglutinin inhibition - A/Indonesia/05/2005 Antigen	DAY56	21MAR2011	7.071067812	1.414213562	0	0	Hemagglutinin inhibition	A/Indonesia/05/2005 Antigen	1.95601150273309	13.7118489317096	901530.3	Male	15	48	Non-Hispanic or Non-Latino	Yes	09	3
47FUR037	Multiple	Multiple (A)	10	10 (Day 180 or 208)	80059	Previously Vaccinated	MultipleBoost	15	Hemagglutinin inhibition - A/Indonesia/05/2005 Antigen	DAY180	21JUL2011	5	1	0	0	Hemagglutinin inhibition	A/Indonesia/05/2005 Antigen	1.6094379124341	14.2917447369606	1610000	Male	15	48	Non-Hispanic or Non-Latino	Yes	10	3
47FUR037	Multiple	Multiple (A)	10	10 (Day 180 or 208)	80059	Previously Vaccinated	MultipleBoost	15	Hemagglutinin inhibition - A/Indonesia/05/2005 Antigen	DAY180	21JUL2011	5	1	0	0	Hemagglutinin inhibition	A/Indonesia/05/2005 Antigen	1.6094379124341	13.9198705732885	1110000	Male	15	48	Non-Hispanic or Non-Latino	Yes	10	3
47FUR039	Primed90	Primed (A)	1	1 (Day 0)	80059	Previously Vaccinated	PriorDoseLow	90	Hemagglutinin inhibition - A/Indonesia/05/2005 Antigen	PREVAC	31JAN2011	5	.	0	.	Hemagglutinin inhibition	A/Indonesia/05/2005 Antigen	1.6094379124341	13.5600161916157	774533.5	Male	90	41	Non-Hispanic or Non-Latino	Yes	01	3
47FUR039	Primed90	Primed (A)	1	1 (Day 0)	80059	Previously Vaccinated	PriorDoseLow	90	Hemagglutinin inhibition - A/Indonesia/05/2005 Antigen	PREVAC	31JAN2011	5	.	0	.	Hemagglutinin inhibition	A/Indonesia/05/2005 Antigen	1.6094379124341	13.5395662213056	758855.17	Male	90	41	Non-Hispanic or Non-Latino	Yes	01	3
47FUR039	Primed90	Primed (A)	2	2 (Day 3)	80059	Previously Vaccinated	PriorDoseLow	90	Hemagglutinin inhibition - A/Indonesia/05/2005 Antigen	DAY3	03FEB2011	5	1	0	0	Hemagglutinin inhibition	A/Indonesia/05/2005 Antigen	1.6094379124341	10.4811085550695	35635.89	Male	90	41	Non-Hispanic or Non-Latino	Yes	02	3
47FUR039	Primed90	Primed (A)	2	2 (Day 3)	80059	Previously Vaccinated	PriorDoseLow	90	Hemagglutinin inhibition - A/Indonesia/05/2005 Antigen	DAY3	03FEB2011	5	1	0	0	Hemagglutinin inhibition	A/Indonesia/05/2005 Antigen	1.6094379124341	10.1999704092268	26902.39	Male	90	41	Non-Hispanic or Non-Latino	Yes	02	3
47FUR039	Primed90	Primed (A)	3	3 (Day 7)	80059	Previously Vaccinated	PriorDoseLow	90	Hemagglutinin inhibition - A/Indonesia/05/2005 Antigen	DAY7	08FEB2011	56.5685425	11.3137085	1	1	Hemagglutinin inhibition	A/Indonesia/05/2005 Antigen	4.03545304448364	10.722386599777	45360.03	Male	90	41	Non-Hispanic or Non-Latino	Yes	03	3
47FUR039	Primed90	Primed (A)	3	3 (Day 7)	80059	Previously Vaccinated	PriorDoseLow	90	Hemagglutinin inhibition - A/Indonesia/05/2005 Antigen	DAY7	08FEB2011	56.5685425	11.3137085	1	1	Hemagglutinin inhibition	A/Indonesia/05/2005 Antigen	4.03545304448364	10.4168718002304	33418.73	Male	90	41	Non-Hispanic or Non-Latino	Yes	03	3
47FUR039	Primed90	Primed (A)	4	4 (Day 14)	80059	Previously Vaccinated	PriorDoseLow	90	Hemagglutinin inhibition - A/Indonesia/05/2005 Antigen	DAY14	14FEB2011	226.27417	45.254834	1	1	Hemagglutinin inhibition	A/Indonesia/05/2005 Antigen	5.42174740560353	12.5737121335566	288864.25	Male	90	41	Non-Hispanic or Non-Latino	Yes	04	3
47FUR039	Primed90	Primed (A)	4	4 (Day 14)	80059	Previously Vaccinated	PriorDoseLow	90	Hemagglutinin inhibition - A/Indonesia/05/2005 Antigen	DAY14	14FEB2011	226.27417	45.254834	1	1	Hemagglutinin inhibition	A/Indonesia/05/2005 Antigen	5.42174740560353	12.3388709194888	228403.92	Male	90	41	Non-Hispanic or Non-Latino	Yes	04	3
47FUR039	Primed90	Primed (A)	5	5 (Day 28)	80059	Previously Vaccinated	PriorDoseLow	90	Hemagglutinin inhibition - A/Indonesia/05/2005 Antigen	DAY28	28FEB2011	226.27417	45.254834	1	1	Hemagglutinin inhibition	A/Indonesia/05/2005 Antigen	5.42174740560353	12.6731520659416	319065.62	Male	90	41	Non-Hispanic or Non-Latino	Yes	05	3
47FUR039	Primed90	Primed (A)	5	5 (Day 28)	80059	Previously Vaccinated	PriorDoseLow	90	Hemagglutinin inhibition - A/Indonesia/05/2005 Antigen	DAY28	28FEB2011	226.27417	45.254834	1	1	Hemagglutinin inhibition	A/Indonesia/05/2005 Antigen	5.42174740560353	12.3998182404664	242757.49	Male	90	41	Non-Hispanic or Non-Latino	Yes	05	3
47FUR039	Primed90	Primed (A)	9	9 (Day 56)	80059	Previously Vaccinated	PriorDoseLow	90	Hemagglutinin inhibition - A/Indonesia/05/2005 Antigen	DAY56	28MAR2011	113.137085	22.627417	1	1	Hemagglutinin inhibition	A/Indonesia/05/2005 Antigen	4.72860022504359	13.7544003720306	940719.58	Male	90	41	Non-Hispanic or Non-Latino	Yes	09	3
47FUR039	Primed90	Primed (A)	9	9 (Day 56)	80059	Previously Vaccinated	PriorDoseLow	90	Hemagglutinin inhibition - A/Indonesia/05/2005 Antigen	DAY56	28MAR2011	113.137085	22.627417	1	1	Hemagglutinin inhibition	A/Indonesia/05/2005 Antigen	4.72860022504359	13.7356819015468	923274.53	Male	90	41	Non-Hispanic or Non-Latino	Yes	09	3
47FUR039	Primed90	Primed (A)	10	10 (Day 180 or 208)	80059	Previously Vaccinated	PriorDoseLow	90	Hemagglutinin inhibition - A/Indonesia/05/2005 Antigen	DAY180	25JUL2011	80	16	1	1	Hemagglutinin inhibition	A/Indonesia/05/2005 Antigen	4.38202663467388	13.3075513221803	601722.3	Male	90	41	Non-Hispanic or Non-Latino	Yes	10	3
47FUR039	Primed90	Primed (A)	10	10 (Day 180 or 208)	80059	Previously Vaccinated	PriorDoseLow	90	Hemagglutinin inhibition - A/Indonesia/05/2005 Antigen	DAY180	25JUL2011	80	16	1	1	Hemagglutinin inhibition	A/Indonesia/05/2005 Antigen	4.38202663467388	13.0987621874954	488337.57	Male	90	41	Non-Hispanic or Non-Latino	Yes	10	3
47FUR040	Primed90	Primed (A)	1	1 (Day 0)	80059	Previously Vaccinated	PriorDoseHigh	90	Hemagglutinin inhibition - A/Indonesia/05/2005 Antigen	PREVAC	01FEB2011	5	.	0	.	Hemagglutinin inhibition	A/Indonesia/05/2005 Antigen	1.6094379124341	10.4130666997729	33291.81	Male	90	44	Non-Hispanic or Non-Latino	Yes	01	4
47FUR040	Primed90	Primed (A)	1	1 (Day 0)	80059	Previously Vaccinated	PriorDoseHigh	90	Hemagglutinin inhibition - A/Indonesia/05/2005 Antigen	PREVAC	01FEB2011	5	.	0	.	Hemagglutinin inhibition	A/Indonesia/05/2005 Antigen	1.6094379124341	.	.	Male	90	44	Non-Hispanic or Non-Latino	Yes	01	4
47FUR040	Primed90	Primed (A)	2	2 (Day 3)	80059	Previously Vaccinated	PriorDoseHigh	90	Hemagglutinin inhibition - A/Indonesia/05/2005 Antigen	DAY3	04FEB2011	5	1	0	0	Hemagglutinin inhibition	A/Indonesia/05/2005 Antigen	1.6094379124341	10.044532150218	23029.52	Male	90	44	Non-Hispanic or Non-Latino	Yes	02	4
47FUR040	Primed90	Primed (A)	2	2 (Day 3)	80059	Previously Vaccinated	PriorDoseHigh	90	Hemagglutinin inhibition - A/Indonesia/05/2005 Antigen	DAY3	04FEB2011	5	1	0	0	Hemagglutinin inhibition	A/Indonesia/05/2005 Antigen	1.6094379124341	.	.	Male	90	44	Non-Hispanic or Non-Latino	Yes	02	4
47FUR040	Primed90	Primed (A)	3	3 (Day 7)	80059	Previously Vaccinated	PriorDoseHigh	90	Hemagglutinin inhibition - A/Indonesia/05/2005 Antigen	DAY7	08FEB2011	5	1	0	0	Hemagglutinin inhibition	A/Indonesia/05/2005 Antigen	1.6094379124341	12.055681290578	172074.24	Male	90	44	Non-Hispanic or Non-Latino	Yes	03	4
47FUR040	Primed90	Primed (A)	3	3 (Day 7)	80059	Previously Vaccinated	PriorDoseHigh	90	Hemagglutinin inhibition - A/Indonesia/05/2005 Antigen	DAY7	08FEB2011	5	1	0	0	Hemagglutinin inhibition	A/Indonesia/05/2005 Antigen	1.6094379124341	11.5247428636481	101188.75	Male	90	44	Non-Hispanic or Non-Latino	Yes	03	4
47FUR040	Primed90	Primed (A)	4	4 (Day 14)	80059	Previously Vaccinated	PriorDoseHigh	90	Hemagglutinin inhibition - A/Indonesia/05/2005 Antigen	DAY14	15FEB2011	31.74802104	6.349604208	0	0	Hemagglutinin inhibition	A/Indonesia/05/2005 Antigen	3.45783039394732	12.4900964847989	265692.92	Male	90	44	Non-Hispanic or Non-Latino	Yes	04	4
47FUR040	Primed90	Primed (A)	4	4 (Day 14)	80059	Previously Vaccinated	PriorDoseHigh	90	Hemagglutinin inhibition - A/Indonesia/05/2005 Antigen	DAY14	15FEB2011	31.74802104	6.349604208	0	0	Hemagglutinin inhibition	A/Indonesia/05/2005 Antigen	3.45783039394732	12.1341439508714	186119.45	Male	90	44	Non-Hispanic or Non-Latino	Yes	04	4
47FUR040	Primed90	Primed (A)	5	5 (Day 28)	80059	Previously Vaccinated	PriorDoseHigh	90	Hemagglutinin inhibition - A/Indonesia/05/2005 Antigen	DAY28	01MAR2011	7.071067812	1.414213562	0	0	Hemagglutinin inhibition	A/Indonesia/05/2005 Antigen	1.95601150273309	12.6778773081911	320576.85	Male	90	44	Non-Hispanic or Non-Latino	Yes	05	4
47FUR040	Primed90	Primed (A)	5	5 (Day 28)	80059	Previously Vaccinated	PriorDoseHigh	90	Hemagglutinin inhibition - A/Indonesia/05/2005 Antigen	DAY28	01MAR2011	7.071067812	1.414213562	0	0	Hemagglutinin inhibition	A/Indonesia/05/2005 Antigen	1.95601150273309	12.3225631128465	224709.36	Male	90	44	Non-Hispanic or Non-Latino	Yes	05	4
47FUR040	Primed90	Primed (A)	9	9 (Day 56)	80059	Previously Vaccinated	PriorDoseHigh	90	Hemagglutinin inhibition - A/Indonesia/05/2005 Antigen	DAY56	29MAR2011	5	1	0	0	Hemagglutinin inhibition	A/Indonesia/05/2005 Antigen	1.6094379124341	12.6170267614339	301651.23	Male	90	44	Non-Hispanic or Non-Latino	Yes	09	4
47FUR040	Primed90	Primed (A)	9	9 (Day 56)	80059	Previously Vaccinated	PriorDoseHigh	90	Hemagglutinin inhibition - A/Indonesia/05/2005 Antigen	DAY56	29MAR2011	5	1	0	0	Hemagglutinin inhibition	A/Indonesia/05/2005 Antigen	1.6094379124341	12.1934081887672	197483.08	Male	90	44	Non-Hispanic or Non-Latino	Yes	09	4
47FUR040	Primed90	Primed (A)	10	10 (Day 180 or 208)	80059	Previously Vaccinated	PriorDoseHigh	90	Hemagglutinin inhibition - A/Indonesia/05/2005 Antigen	DAY180	26JUL2011	5	1	0	0	Hemagglutinin inhibition	A/Indonesia/05/2005 Antigen	1.6094379124341	11.8484847850098	139872.25	Male	90	44	Non-Hispanic or Non-Latino	Yes	10	4
47FUR040	Primed90	Primed (A)	10	10 (Day 180 or 208)	80059	Previously Vaccinated	PriorDoseHigh	90	Hemagglutinin inhibition - A/Indonesia/05/2005 Antigen	DAY180	26JUL2011	5	1	0	0	Hemagglutinin inhibition	A/Indonesia/05/2005 Antigen	1.6094379124341	11.3307053830275	83341.79	Male	90	44	Non-Hispanic or Non-Latino	Yes	10	4
47FUR041	Primed15	Primed (A)	1	1 (Day 0)	80059	Previously Vaccinated	PriorDoseLow	15	Hemagglutinin inhibition - A/Indonesia/05/2005 Antigen	PREVAC	07FEB2011	5	.	0	.	Hemagglutinin inhibition	A/Indonesia/05/2005 Antigen	1.6094379124341	11.1573246582252	70075.23	Female	15	52	Non-Hispanic or Non-Latino	Yes	01	4
47FUR041	Primed15	Primed (A)	1	1 (Day 0)	80059	Previously Vaccinated	PriorDoseLow	15	Hemagglutinin inhibition - A/Indonesia/05/2005 Antigen	PREVAC	07FEB2011	5	.	0	.	Hemagglutinin inhibition	A/Indonesia/05/2005 Antigen	1.6094379124341	10.2781260317167	29089.31	Female	15	52	Non-Hispanic or Non-Latino	Yes	01	4
47FUR041	Primed15	Primed (A)	2	2 (Day 3)	80059	Previously Vaccinated	PriorDoseLow	15	Hemagglutinin inhibition - A/Indonesia/05/2005 Antigen	DAY3	10FEB2011	5	1	0	0	Hemagglutinin inhibition	A/Indonesia/05/2005 Antigen	1.6094379124341	10.9708167549056	58152.07	Female	15	52	Non-Hispanic or Non-Latino	Yes	02	4
47FUR041	Primed15	Primed (A)	2	2 (Day 3)	80059	Previously Vaccinated	PriorDoseLow	15	Hemagglutinin inhibition - A/Indonesia/05/2005 Antigen	DAY3	10FEB2011	5	1	0	0	Hemagglutinin inhibition	A/Indonesia/05/2005 Antigen	1.6094379124341	10.6540631938034	42364.38	Female	15	52	Non-Hispanic or Non-Latino	Yes	02	4
47FUR041	Primed15	Primed (A)	3	3 (Day 7)	80059	Previously Vaccinated	PriorDoseLow	15	Hemagglutinin inhibition - A/Indonesia/05/2005 Antigen	DAY7	14FEB2011	5	1	0	0	Hemagglutinin inhibition	A/Indonesia/05/2005 Antigen	1.6094379124341	10.7949481523645	48773.78	Female	15	52	Non-Hispanic or Non-Latino	Yes	03	4
47FUR041	Primed15	Primed (A)	3	3 (Day 7)	80059	Previously Vaccinated	PriorDoseLow	15	Hemagglutinin inhibition - A/Indonesia/05/2005 Antigen	DAY7	14FEB2011	5	1	0	0	Hemagglutinin inhibition	A/Indonesia/05/2005 Antigen	1.6094379124341	10.1639789103622	25951.35	Female	15	52	Non-Hispanic or Non-Latino	Yes	03	4
47FUR041	Primed15	Primed (A)	4	4 (Day 14)	80059	Previously Vaccinated	PriorDoseLow	15	Hemagglutinin inhibition - A/Indonesia/05/2005 Antigen	DAY14	21FEB2011	5	1	0	0	Hemagglutinin inhibition	A/Indonesia/05/2005 Antigen	1.6094379124341	11.2011774501959	73216.6	Female	15	52	Non-Hispanic or Non-Latino	Yes	04	4
47FUR041	Primed15	Primed (A)	4	4 (Day 14)	80059	Previously Vaccinated	PriorDoseLow	15	Hemagglutinin inhibition - A/Indonesia/05/2005 Antigen	DAY14	21FEB2011	5	1	0	0	Hemagglutinin inhibition	A/Indonesia/05/2005 Antigen	1.6094379124341	10.5875516061129	39638.32	Female	15	52	Non-Hispanic or Non-Latino	Yes	04	4
47FUR041	Primed15	Primed (A)	5	5 (Day 28)	80059	Previously Vaccinated	PriorDoseLow	15	Hemagglutinin inhibition - A/Indonesia/05/2005 Antigen	DAY28	07MAR2011	5	1	0	0	Hemagglutinin inhibition	A/Indonesia/05/2005 Antigen	1.6094379124341	11.3011815650237	80917.19	Female	15	52	Non-Hispanic or Non-Latino	Yes	05	4
47FUR041	Primed15	Primed (A)	5	5 (Day 28)	80059	Previously Vaccinated	PriorDoseLow	15	Hemagglutinin inhibition - A/Indonesia/05/2005 Antigen	DAY28	07MAR2011	5	1	0	0	Hemagglutinin inhibition	A/Indonesia/05/2005 Antigen	1.6094379124341	10.7502545577589	46641.9	Female	15	52	Non-Hispanic or Non-Latino	Yes	05	4
47FUR041	Primed15	Primed (A)	9	9 (Day 56)	80059	Previously Vaccinated	PriorDoseLow	15	Hemagglutinin inhibition - A/Indonesia/05/2005 Antigen	DAY56	04APR2011	5	1	0	0	Hemagglutinin inhibition	A/Indonesia/05/2005 Antigen	1.6094379124341	11.5050420725273	99214.76	Female	15	52	Non-Hispanic or Non-Latino	Yes	09	4
47FUR041	Primed15	Primed (A)	9	9 (Day 56)	80059	Previously Vaccinated	PriorDoseLow	15	Hemagglutinin inhibition - A/Indonesia/05/2005 Antigen	DAY56	04APR2011	5	1	0	0	Hemagglutinin inhibition	A/Indonesia/05/2005 Antigen	1.6094379124341	10.9459780663389	56725.44	Female	15	52	Non-Hispanic or Non-Latino	Yes	09	4
47FUR041	Primed15	Primed (A)	10	10 (Day 180 or 208)	80059	Previously Vaccinated	PriorDoseLow	15	Hemagglutinin inhibition - A/Indonesia/05/2005 Antigen	DAY180	09AUG2011	5	1	0	0	Hemagglutinin inhibition	A/Indonesia/05/2005 Antigen	1.6094379124341	11.504087726956	99120.12	Female	15	52	Non-Hispanic or Non-Latino	Yes	10	4
47FUR041	Primed15	Primed (A)	10	10 (Day 180 or 208)	80059	Previously Vaccinated	PriorDoseLow	15	Hemagglutinin inhibition - A/Indonesia/05/2005 Antigen	DAY180	09AUG2011	5	1	0	0	Hemagglutinin inhibition	A/Indonesia/05/2005 Antigen	1.6094379124341	11.1033106085542	66390.59	Female	15	52	Non-Hispanic or Non-Latino	Yes	10	4
47FUR042	Multiple	Multiple (A)	1	1 (Day 0)	80059	Previously Vaccinated	MultipleBoost	15	Hemagglutinin inhibition - A/Indonesia/05/2005 Antigen	PREVAC	07FEB2011	20	.	0	.	Hemagglutinin inhibition	A/Indonesia/05/2005 Antigen	2.99573227355399	12.8047108852081	363927.84	Female	15	48	Non-Hispanic or Non-Latino	Yes	01	4
47FUR042	Multiple	Multiple (A)	1	1 (Day 0)	80059	Previously Vaccinated	MultipleBoost	15	Hemagglutinin inhibition - A/Indonesia/05/2005 Antigen	PREVAC	07FEB2011	20	.	0	.	Hemagglutinin inhibition	A/Indonesia/05/2005 Antigen	2.99573227355399	12.487015598541	264875.61	Female	15	48	Non-Hispanic or Non-Latino	Yes	01	4
47FUR042	Multiple	Multiple (A)	2	2 (Day 3)	80059	Previously Vaccinated	MultipleBoost	15	Hemagglutinin inhibition - A/Indonesia/05/2005 Antigen	DAY3	09FEB2011	28.28427125	1.414213562	0	0	Hemagglutinin inhibition	A/Indonesia/05/2005 Antigen	3.34230586392369	12.650899802957	312044.1	Female	15	48	Non-Hispanic or Non-Latino	Yes	02	4
47FUR042	Multiple	Multiple (A)	2	2 (Day 3)	80059	Previously Vaccinated	MultipleBoost	15	Hemagglutinin inhibition - A/Indonesia/05/2005 Antigen	DAY3	09FEB2011	28.28427125	1.414213562	0	0	Hemagglutinin inhibition	A/Indonesia/05/2005 Antigen	3.34230586392369	12.3907401567532	240563.69	Female	15	48	Non-Hispanic or Non-Latino	Yes	02	4
47FUR042	Multiple	Multiple (A)	3	3 (Day 7)	80059	Previously Vaccinated	MultipleBoost	15	Hemagglutinin inhibition - A/Indonesia/05/2005 Antigen	DAY7	14FEB2011	40	2	1	0	Hemagglutinin inhibition	A/Indonesia/05/2005 Antigen	3.68887945411393	12.6984860091914	327252.07	Female	15	48	Non-Hispanic or Non-Latino	Yes	03	4
47FUR042	Multiple	Multiple (A)	3	3 (Day 7)	80059	Previously Vaccinated	MultipleBoost	15	Hemagglutinin inhibition - A/Indonesia/05/2005 Antigen	DAY7	14FEB2011	40	2	1	0	Hemagglutinin inhibition	A/Indonesia/05/2005 Antigen	3.68887945411393	12.4834545782027	263934.06	Female	15	48	Non-Hispanic or Non-Latino	Yes	03	4
47FUR042	Multiple	Multiple (A)	4	4 (Day 14)	80059	Previously Vaccinated	MultipleBoost	15	Hemagglutinin inhibition - A/Indonesia/05/2005 Antigen	DAY14	21FEB2011	113.137085	5.65685425	1	1	Hemagglutinin inhibition	A/Indonesia/05/2005 Antigen	4.72860022504359	13.4952623039021	725968.79	Female	15	48	Non-Hispanic or Non-Latino	Yes	04	4
47FUR042	Multiple	Multiple (A)	4	4 (Day 14)	80059	Previously Vaccinated	MultipleBoost	15	Hemagglutinin inhibition - A/Indonesia/05/2005 Antigen	DAY14	21FEB2011	113.137085	5.65685425	1	1	Hemagglutinin inhibition	A/Indonesia/05/2005 Antigen	4.72860022504359	13.1322302196239	504957.84	Female	15	48	Non-Hispanic or Non-Latino	Yes	04	4
47FUR042	Multiple	Multiple (A)	5	5 (Day 28)	80059	Previously Vaccinated	MultipleBoost	15	Hemagglutinin inhibition - A/Indonesia/05/2005 Antigen	DAY28	09MAR2011	80	4	1	1	Hemagglutinin inhibition	A/Indonesia/05/2005 Antigen	4.38202663467388	13.6654819922057	860683.39	Female	15	48	Non-Hispanic or Non-Latino	Yes	05	4
47FUR042	Multiple	Multiple (A)	5	5 (Day 28)	80059	Previously Vaccinated	MultipleBoost	15	Hemagglutinin inhibition - A/Indonesia/05/2005 Antigen	DAY28	09MAR2011	80	4	1	1	Hemagglutinin inhibition	A/Indonesia/05/2005 Antigen	4.38202663467388	13.3502703814419	627984.26	Female	15	48	Non-Hispanic or Non-Latino	Yes	05	4
47FUR042	Multiple	Multiple (A)	9	9 (Day 56)	80059	Previously Vaccinated	MultipleBoost	15	Hemagglutinin inhibition - A/Indonesia/05/2005 Antigen	DAY56	06APR2011	80	4	1	1	Hemagglutinin inhibition	A/Indonesia/05/2005 Antigen	4.38202663467388	11.9967630251127	162228.81	Female	15	48	Non-Hispanic or Non-Latino	Yes	09	4
47FUR042	Multiple	Multiple (A)	9	9 (Day 56)	80059	Previously Vaccinated	MultipleBoost	15	Hemagglutinin inhibition - A/Indonesia/05/2005 Antigen	DAY56	06APR2011	80	4	1	1	Hemagglutinin inhibition	A/Indonesia/05/2005 Antigen	4.38202663467388	11.3997317945483	89297.77	Female	15	48	Non-Hispanic or Non-Latino	Yes	09	4
47FUR042	Multiple	Multiple (A)	10	10 (Day 180 or 208)	80059	Previously Vaccinated	MultipleBoost	15	Hemagglutinin inhibition - A/Indonesia/05/2005 Antigen	DAY180	02AUG2011	80	4	1	1	Hemagglutinin inhibition	A/Indonesia/05/2005 Antigen	4.38202663467388	13.3904562022928	653734.25	Female	15	48	Non-Hispanic or Non-Latino	Yes	10	4
47FUR042	Multiple	Multiple (A)	10	10 (Day 180 or 208)	80059	Previously Vaccinated	MultipleBoost	15	Hemagglutinin inhibition - A/Indonesia/05/2005 Antigen	DAY180	02AUG2011	80	4	1	1	Hemagglutinin inhibition	A/Indonesia/05/2005 Antigen	4.38202663467388	13.0842494211696	481301.62	Female	15	48	Non-Hispanic or Non-Latino	Yes	10	4
47FUR044	Multiple	Multiple (A)	1	1 (Day 0)	80059	Previously Vaccinated	MultipleBoost	15	Hemagglutinin inhibition - A/Indonesia/05/2005 Antigen	PREVAC	07FEB2011	5	.	0	.	Hemagglutinin inhibition	A/Indonesia/05/2005 Antigen	1.6094379124341	12.1053875718285	180843.55	Female	15	45	Non-Hispanic or Non-Latino	Yes	01	5
47FUR044	Multiple	Multiple (A)	1	1 (Day 0)	80059	Previously Vaccinated	MultipleBoost	15	Hemagglutinin inhibition - A/Indonesia/05/2005 Antigen	PREVAC	07FEB2011	5	.	0	.	Hemagglutinin inhibition	A/Indonesia/05/2005 Antigen	1.6094379124341	12.0919992269781	178438.49	Female	15	45	Non-Hispanic or Non-Latino	Yes	01	5
47FUR044	Multiple	Multiple (A)	2	2 (Day 3)	80059	Previously Vaccinated	MultipleBoost	15	Hemagglutinin inhibition - A/Indonesia/05/2005 Antigen	DAY3	10FEB2011	5	1	0	0	Hemagglutinin inhibition	A/Indonesia/05/2005 Antigen	1.6094379124341	12.1976001047072	198312.65	Female	15	45	Non-Hispanic or Non-Latino	Yes	02	5
47FUR044	Multiple	Multiple (A)	2	2 (Day 3)	80059	Previously Vaccinated	MultipleBoost	15	Hemagglutinin inhibition - A/Indonesia/05/2005 Antigen	DAY3	10FEB2011	5	1	0	0	Hemagglutinin inhibition	A/Indonesia/05/2005 Antigen	1.6094379124341	11.9844852577651	160249.18	Female	15	45	Non-Hispanic or Non-Latino	Yes	02	5
47FUR044	Multiple	Multiple (A)	3	3 (Day 7)	80059	Previously Vaccinated	MultipleBoost	15	Hemagglutinin inhibition - A/Indonesia/05/2005 Antigen	DAY7	15FEB2011	28.28427125	5.65685425	0	0	Hemagglutinin inhibition	A/Indonesia/05/2005 Antigen	3.34230586392369	12.9473538464728	419724.51	Female	15	45	Non-Hispanic or Non-Latino	Yes	03	5
47FUR044	Multiple	Multiple (A)	3	3 (Day 7)	80059	Previously Vaccinated	MultipleBoost	15	Hemagglutinin inhibition - A/Indonesia/05/2005 Antigen	DAY7	15FEB2011	28.28427125	5.65685425	0	0	Hemagglutinin inhibition	A/Indonesia/05/2005 Antigen	3.34230586392369	12.9003060359505	400434.72	Female	15	45	Non-Hispanic or Non-Latino	Yes	03	5
47FUR044	Multiple	Multiple (A)	4	4 (Day 14)	80059	Previously Vaccinated	MultipleBoost	15	Hemagglutinin inhibition - A/Indonesia/05/2005 Antigen	DAY14	21FEB2011	56.5685425	11.3137085	1	1	Hemagglutinin inhibition	A/Indonesia/05/2005 Antigen	4.03545304448364	13.3043158827738	599778.61	Female	15	45	Non-Hispanic or Non-Latino	Yes	04	5
47FUR044	Multiple	Multiple (A)	4	4 (Day 14)	80059	Previously Vaccinated	MultipleBoost	15	Hemagglutinin inhibition - A/Indonesia/05/2005 Antigen	DAY14	21FEB2011	56.5685425	11.3137085	1	1	Hemagglutinin inhibition	A/Indonesia/05/2005 Antigen	4.03545304448364	13.2333104073919	558667.86	Female	15	45	Non-Hispanic or Non-Latino	Yes	04	5
47FUR044	Multiple	Multiple (A)	9	9 (Day 56)	80059	Previously Vaccinated	MultipleBoost	15	Hemagglutinin inhibition - A/Indonesia/05/2005 Antigen	DAY56	04APR2011	28.28427125	5.65685425	0	0	Hemagglutinin inhibition	A/Indonesia/05/2005 Antigen	3.34230586392369	12.9419804442646	417475.21	Female	15	45	Non-Hispanic or Non-Latino	Yes	09	5
47FUR044	Multiple	Multiple (A)	9	9 (Day 56)	80059	Previously Vaccinated	MultipleBoost	15	Hemagglutinin inhibition - A/Indonesia/05/2005 Antigen	DAY56	04APR2011	28.28427125	5.65685425	0	0	Hemagglutinin inhibition	A/Indonesia/05/2005 Antigen	3.34230586392369	12.8171462200378	368481.66	Female	15	45	Non-Hispanic or Non-Latino	Yes	09	5
47FUR044	Multiple	Multiple (A)	10	10 (Day 180 or 208)	80059	Previously Vaccinated	MultipleBoost	15	Hemagglutinin inhibition - A/Indonesia/05/2005 Antigen	DAY180	11AUG2011	7.071067812	1.414213562	0	0	Hemagglutinin inhibition	A/Indonesia/05/2005 Antigen	1.95601150273309	12.5297312079834	276435.06	Female	15	45	Non-Hispanic or Non-Latino	Yes	10	5
47FUR044	Multiple	Multiple (A)	10	10 (Day 180 or 208)	80059	Previously Vaccinated	MultipleBoost	15	Hemagglutinin inhibition - A/Indonesia/05/2005 Antigen	DAY180	11AUG2011	7.071067812	1.414213562	0	0	Hemagglutinin inhibition	A/Indonesia/05/2005 Antigen	1.95601150273309	12.3343541126302	227374.59	Female	15	45	Non-Hispanic or Non-Latino	Yes	10	5
47FUR045	Primed15	Primed (A)	1	1 (Day 0)	80059	Previously Vaccinated	PriorDoseHigh	15	Hemagglutinin inhibition - A/Indonesia/05/2005 Antigen	PREVAC	07FEB2011	5	.	0	.	Hemagglutinin inhibition	A/Indonesia/05/2005 Antigen	1.6094379124341	12.1664986219701	192239.76	Female	15	50	Non-Hispanic or Non-Latino	Yes	01	1
47FUR045	Primed15	Primed (A)	1	1 (Day 0)	80059	Previously Vaccinated	PriorDoseHigh	15	Hemagglutinin inhibition - A/Indonesia/05/2005 Antigen	PREVAC	07FEB2011	5	.	0	.	Hemagglutinin inhibition	A/Indonesia/05/2005 Antigen	1.6094379124341	12.023939550976	166698.08	Female	15	50	Non-Hispanic or Non-Latino	Yes	01	1
47FUR045	Primed15	Primed (A)	2	2 (Day 3)	80059	Previously Vaccinated	PriorDoseHigh	15	Hemagglutinin inhibition - A/Indonesia/05/2005 Antigen	DAY3	10FEB2011	5	1	0	0	Hemagglutinin inhibition	A/Indonesia/05/2005 Antigen	1.6094379124341	12.0233007073297	166591.62	Female	15	50	Non-Hispanic or Non-Latino	Yes	02	1
47FUR045	Primed15	Primed (A)	2	2 (Day 3)	80059	Previously Vaccinated	PriorDoseHigh	15	Hemagglutinin inhibition - A/Indonesia/05/2005 Antigen	DAY3	10FEB2011	5	1	0	0	Hemagglutinin inhibition	A/Indonesia/05/2005 Antigen	1.6094379124341	11.8548994676538	140772.37	Female	15	50	Non-Hispanic or Non-Latino	Yes	02	1
47FUR045	Primed15	Primed (A)	3	3 (Day 7)	80059	Previously Vaccinated	PriorDoseHigh	15	Hemagglutinin inhibition - A/Indonesia/05/2005 Antigen	DAY7	15FEB2011	5	1	0	0	Hemagglutinin inhibition	A/Indonesia/05/2005 Antigen	1.6094379124341	12.6136875079265	300645.62	Female	15	50	Non-Hispanic or Non-Latino	Yes	03	1
47FUR045	Primed15	Primed (A)	3	3 (Day 7)	80059	Previously Vaccinated	PriorDoseHigh	15	Hemagglutinin inhibition - A/Indonesia/05/2005 Antigen	DAY7	15FEB2011	5	1	0	0	Hemagglutinin inhibition	A/Indonesia/05/2005 Antigen	1.6094379124341	12.3454448597972	229910.38	Female	15	50	Non-Hispanic or Non-Latino	Yes	03	1
47FUR045	Primed15	Primed (A)	4	4 (Day 14)	80059	Previously Vaccinated	PriorDoseHigh	15	Hemagglutinin inhibition - A/Indonesia/05/2005 Antigen	DAY14	23FEB2011	7.071067812	1.414213562	0	0	Hemagglutinin inhibition	A/Indonesia/05/2005 Antigen	1.95601150273309	12.2339449293112	205652.87	Female	15	50	Non-Hispanic or Non-Latino	Yes	04	1
47FUR045	Primed15	Primed (A)	4	4 (Day 14)	80059	Previously Vaccinated	PriorDoseHigh	15	Hemagglutinin inhibition - A/Indonesia/05/2005 Antigen	DAY14	23FEB2011	7.071067812	1.414213562	0	0	Hemagglutinin inhibition	A/Indonesia/05/2005 Antigen	1.95601150273309	12.0248057124251	166842.53	Female	15	50	Non-Hispanic or Non-Latino	Yes	04	1
47FUR045	Primed15	Primed (A)	5	5 (Day 28)	80059	Previously Vaccinated	PriorDoseHigh	15	Hemagglutinin inhibition - A/Indonesia/05/2005 Antigen	DAY28	07MAR2011	7.071067812	1.414213562	0	0	Hemagglutinin inhibition	A/Indonesia/05/2005 Antigen	1.95601150273309	12.3817175043662	238402.93	Female	15	50	Non-Hispanic or Non-Latino	Yes	05	1
47FUR045	Primed15	Primed (A)	5	5 (Day 28)	80059	Previously Vaccinated	PriorDoseHigh	15	Hemagglutinin inhibition - A/Indonesia/05/2005 Antigen	DAY28	07MAR2011	7.071067812	1.414213562	0	0	Hemagglutinin inhibition	A/Indonesia/05/2005 Antigen	1.95601150273309	12.1885106321827	196518.26	Female	15	50	Non-Hispanic or Non-Latino	Yes	05	1
47FUR045	Primed15	Primed (A)	9	9 (Day 56)	80059	Previously Vaccinated	PriorDoseHigh	15	Hemagglutinin inhibition - A/Indonesia/05/2005 Antigen	DAY56	05APR2011	5	1	0	0	Hemagglutinin inhibition	A/Indonesia/05/2005 Antigen	1.6094379124341	12.363686934418	234142.91	Female	15	50	Non-Hispanic or Non-Latino	Yes	09	1
47FUR045	Primed15	Primed (A)	9	9 (Day 56)	80059	Previously Vaccinated	PriorDoseHigh	15	Hemagglutinin inhibition - A/Indonesia/05/2005 Antigen	DAY56	05APR2011	5	1	0	0	Hemagglutinin inhibition	A/Indonesia/05/2005 Antigen	1.6094379124341	12.0908956611703	178241.68	Female	15	50	Non-Hispanic or Non-Latino	Yes	09	1
47FUR045	Primed15	Primed (A)	10	10 (Day 180 or 208)	80059	Previously Vaccinated	PriorDoseHigh	15	Hemagglutinin inhibition - A/Indonesia/05/2005 Antigen	DAY180	02AUG2011	5	1	0	0	Hemagglutinin inhibition	A/Indonesia/05/2005 Antigen	1.6094379124341	12.5249226617537	275109	Female	15	50	Non-Hispanic or Non-Latino	Yes	10	1
47FUR045	Primed15	Primed (A)	10	10 (Day 180 or 208)	80059	Previously Vaccinated	PriorDoseHigh	15	Hemagglutinin inhibition - A/Indonesia/05/2005 Antigen	DAY180	02AUG2011	5	1	0	0	Hemagglutinin inhibition	A/Indonesia/05/2005 Antigen	1.6094379124341	12.3240691695074	225048.04	Female	15	50	Non-Hispanic or Non-Latino	Yes	10	1
47FUR047	Primed90	Primed (A)	1	1 (Day 0)	80059	Previously Vaccinated	PriorDoseLow	90	Hemagglutinin inhibition - A/Indonesia/05/2005 Antigen	PREVAC	05MAY2011	5	.	0	.	Hemagglutinin inhibition	A/Indonesia/05/2005 Antigen	1.6094379124341	11.2023550412692	73302.87	Female	90	51	Non-Hispanic or Non-Latino	Yes	01	5
47FUR047	Primed90	Primed (A)	1	1 (Day 0)	80059	Previously Vaccinated	PriorDoseLow	90	Hemagglutinin inhibition - A/Indonesia/05/2005 Antigen	PREVAC	05MAY2011	5	.	0	.	Hemagglutinin inhibition	A/Indonesia/05/2005 Antigen	1.6094379124341	11.054676162161	63238.98	Female	90	51	Non-Hispanic or Non-Latino	Yes	01	5
47FUR047	Primed90	Primed (A)	2	2 (Day 3)	80059	Previously Vaccinated	PriorDoseLow	90	Hemagglutinin inhibition - A/Indonesia/05/2005 Antigen	DAY3	09MAY2011	5	1	0	0	Hemagglutinin inhibition	A/Indonesia/05/2005 Antigen	1.6094379124341	11.2784111356953	79095.49	Female	90	51	Non-Hispanic or Non-Latino	Yes	02	5
47FUR047	Primed90	Primed (A)	2	2 (Day 3)	80059	Previously Vaccinated	PriorDoseLow	90	Hemagglutinin inhibition - A/Indonesia/05/2005 Antigen	DAY3	09MAY2011	5	1	0	0	Hemagglutinin inhibition	A/Indonesia/05/2005 Antigen	1.6094379124341	11.075719503678	64583.84	Female	90	51	Non-Hispanic or Non-Latino	Yes	02	5
47FUR047	Primed90	Primed (A)	3	3 (Day 7)	80059	Previously Vaccinated	PriorDoseLow	90	Hemagglutinin inhibition - A/Indonesia/05/2005 Antigen	DAY7	12MAY2011	5	1	0	0	Hemagglutinin inhibition	A/Indonesia/05/2005 Antigen	1.6094379124341	12.5391881833075	279061.7	Female	90	51	Non-Hispanic or Non-Latino	Yes	03	5
47FUR047	Primed90	Primed (A)	3	3 (Day 7)	80059	Previously Vaccinated	PriorDoseLow	90	Hemagglutinin inhibition - A/Indonesia/05/2005 Antigen	DAY7	12MAY2011	5	1	0	0	Hemagglutinin inhibition	A/Indonesia/05/2005 Antigen	1.6094379124341	12.4246225019655	248854.21	Female	90	51	Non-Hispanic or Non-Latino	Yes	03	5
47FUR047	Primed90	Primed (A)	4	4 (Day 14)	80059	Previously Vaccinated	PriorDoseLow	90	Hemagglutinin inhibition - A/Indonesia/05/2005 Antigen	DAY14	19MAY2011	63.49604208	12.69920842	1	1	Hemagglutinin inhibition	A/Indonesia/05/2005 Antigen	4.15097757450726	12.9614426054662	425679.76	Female	90	51	Non-Hispanic or Non-Latino	Yes	04	5
47FUR047	Primed90	Primed (A)	4	4 (Day 14)	80059	Previously Vaccinated	PriorDoseLow	90	Hemagglutinin inhibition - A/Indonesia/05/2005 Antigen	DAY14	19MAY2011	63.49604208	12.69920842	1	1	Hemagglutinin inhibition	A/Indonesia/05/2005 Antigen	4.15097757450726	12.6860758618417	323215.92	Female	90	51	Non-Hispanic or Non-Latino	Yes	04	5
47FUR047	Primed90	Primed (A)	9	9 (Day 56)	80059	Previously Vaccinated	PriorDoseLow	90	Hemagglutinin inhibition - A/Indonesia/05/2005 Antigen	DAY56	28JUN2011	5	1	0	0	Hemagglutinin inhibition	A/Indonesia/05/2005 Antigen	1.6094379124341	12.6691747955102	317799.13	Female	90	51	Non-Hispanic or Non-Latino	Yes	09	5
47FUR047	Primed90	Primed (A)	9	9 (Day 56)	80059	Previously Vaccinated	PriorDoseLow	90	Hemagglutinin inhibition - A/Indonesia/05/2005 Antigen	DAY56	28JUN2011	5	1	0	0	Hemagglutinin inhibition	A/Indonesia/05/2005 Antigen	1.6094379124341	12.5890427952692	293326.85	Female	90	51	Non-Hispanic or Non-Latino	Yes	09	5
47FUR047	Primed90	Primed (A)	10	10 (Day 180 or 208)	80059	Previously Vaccinated	PriorDoseLow	90	Hemagglutinin inhibition - A/Indonesia/05/2005 Antigen	DAY180	25OCT2011	5	1	0	0	Hemagglutinin inhibition	A/Indonesia/05/2005 Antigen	1.6094379124341	11.9113913354629	148953.78	Female	90	51	Non-Hispanic or Non-Latino	Yes	10	5
47FUR047	Primed90	Primed (A)	10	10 (Day 180 or 208)	80059	Previously Vaccinated	PriorDoseLow	90	Hemagglutinin inhibition - A/Indonesia/05/2005 Antigen	DAY180	25OCT2011	5	1	0	0	Hemagglutinin inhibition	A/Indonesia/05/2005 Antigen	1.6094379124341	11.7659417110041	128790.42	Female	90	51	Non-Hispanic or Non-Latino	Yes	10	5
47FUR048	Multiple	Multiple (A)	1	1 (Day 0)	80059	Previously Vaccinated	MultipleBoost	15	Hemagglutinin inhibition - A/Indonesia/05/2005 Antigen	PREVAC	08FEB2011	5	.	0	.	Hemagglutinin inhibition	A/Indonesia/05/2005 Antigen	1.6094379124341	10.6130908356469	40663.69	Male	15	53	Non-Hispanic or Non-Latino	Yes	01	1
47FUR048	Multiple	Multiple (A)	1	1 (Day 0)	80059	Previously Vaccinated	MultipleBoost	15	Hemagglutinin inhibition - A/Indonesia/05/2005 Antigen	PREVAC	08FEB2011	5	.	0	.	Hemagglutinin inhibition	A/Indonesia/05/2005 Antigen	1.6094379124341	10.3268538080703	30541.87	Male	15	53	Non-Hispanic or Non-Latino	Yes	01	1
47FUR048	Multiple	Multiple (A)	2	2 (Day 3)	80059	Previously Vaccinated	MultipleBoost	15	Hemagglutinin inhibition - A/Indonesia/05/2005 Antigen	DAY3	10FEB2011	5	1	0	0	Hemagglutinin inhibition	A/Indonesia/05/2005 Antigen	1.6094379124341	10.7812205994052	48108.81	Male	15	53	Non-Hispanic or Non-Latino	Yes	02	1
47FUR048	Multiple	Multiple (A)	2	2 (Day 3)	80059	Previously Vaccinated	MultipleBoost	15	Hemagglutinin inhibition - A/Indonesia/05/2005 Antigen	DAY3	10FEB2011	5	1	0	0	Hemagglutinin inhibition	A/Indonesia/05/2005 Antigen	1.6094379124341	10.6031683425095	40262.2	Male	15	53	Non-Hispanic or Non-Latino	Yes	02	1
47FUR048	Multiple	Multiple (A)	3	3 (Day 7)	80059	Previously Vaccinated	MultipleBoost	15	Hemagglutinin inhibition - A/Indonesia/05/2005 Antigen	DAY7	15FEB2011	7.071067812	1.414213562	0	0	Hemagglutinin inhibition	A/Indonesia/05/2005 Antigen	1.95601150273309	12.1223546756803	183938.12	Male	15	53	Non-Hispanic or Non-Latino	Yes	03	1
47FUR048	Multiple	Multiple (A)	3	3 (Day 7)	80059	Previously Vaccinated	MultipleBoost	15	Hemagglutinin inhibition - A/Indonesia/05/2005 Antigen	DAY7	15FEB2011	7.071067812	1.414213562	0	0	Hemagglutinin inhibition	A/Indonesia/05/2005 Antigen	1.95601150273309	11.797517844232	132922.01	Male	15	53	Non-Hispanic or Non-Latino	Yes	03	1
47FUR048	Multiple	Multiple (A)	4	4 (Day 14)	80059	Previously Vaccinated	MultipleBoost	15	Hemagglutinin inhibition - A/Indonesia/05/2005 Antigen	DAY14	23FEB2011	56.5685425	11.3137085	1	1	Hemagglutinin inhibition	A/Indonesia/05/2005 Antigen	4.03545304448364	13.0279776841306	454965.87	Male	15	53	Non-Hispanic or Non-Latino	Yes	04	1
47FUR048	Multiple	Multiple (A)	4	4 (Day 14)	80059	Previously Vaccinated	MultipleBoost	15	Hemagglutinin inhibition - A/Indonesia/05/2005 Antigen	DAY14	23FEB2011	56.5685425	11.3137085	1	1	Hemagglutinin inhibition	A/Indonesia/05/2005 Antigen	4.03545304448364	12.7563167128994	346735.22	Male	15	53	Non-Hispanic or Non-Latino	Yes	04	1
47FUR048	Multiple	Multiple (A)	5	5 (Day 28)	80059	Previously Vaccinated	MultipleBoost	15	Hemagglutinin inhibition - A/Indonesia/05/2005 Antigen	DAY28	08MAR2011	40	8	1	1	Hemagglutinin inhibition	A/Indonesia/05/2005 Antigen	3.68887945411393	12.9855850964811	436081.79	Male	15	53	Non-Hispanic or Non-Latino	Yes	05	1
47FUR048	Multiple	Multiple (A)	5	5 (Day 28)	80059	Previously Vaccinated	MultipleBoost	15	Hemagglutinin inhibition - A/Indonesia/05/2005 Antigen	DAY28	08MAR2011	40	8	1	1	Hemagglutinin inhibition	A/Indonesia/05/2005 Antigen	3.68887945411393	12.6801637222691	321310.66	Male	15	53	Non-Hispanic or Non-Latino	Yes	05	1
47FUR048	Multiple	Multiple (A)	9	9 (Day 56)	80059	Previously Vaccinated	MultipleBoost	15	Hemagglutinin inhibition - A/Indonesia/05/2005 Antigen	DAY56	05APR2011	56.5685425	11.3137085	1	1	Hemagglutinin inhibition	A/Indonesia/05/2005 Antigen	4.03545304448364	13.0440738686457	462348.34	Male	15	53	Non-Hispanic or Non-Latino	Yes	09	1
47FUR048	Multiple	Multiple (A)	9	9 (Day 56)	80059	Previously Vaccinated	MultipleBoost	15	Hemagglutinin inhibition - A/Indonesia/05/2005 Antigen	DAY56	05APR2011	56.5685425	11.3137085	1	1	Hemagglutinin inhibition	A/Indonesia/05/2005 Antigen	4.03545304448364	12.9277740948305	411586.34	Male	15	53	Non-Hispanic or Non-Latino	Yes	09	1
47FUR048	Multiple	Multiple (A)	10	10 (Day 180 or 208)	80059	Previously Vaccinated	MultipleBoost	15	Hemagglutinin inhibition - A/Indonesia/05/2005 Antigen	DAY180	02AUG2011	28.28427125	5.65685425	0	0	Hemagglutinin inhibition	A/Indonesia/05/2005 Antigen	3.34230586392369	12.5813463109887	291077.93	Male	15	53	Non-Hispanic or Non-Latino	Yes	10	1
47FUR048	Multiple	Multiple (A)	10	10 (Day 180 or 208)	80059	Previously Vaccinated	MultipleBoost	15	Hemagglutinin inhibition - A/Indonesia/05/2005 Antigen	DAY180	02AUG2011	28.28427125	5.65685425	0	0	Hemagglutinin inhibition	A/Indonesia/05/2005 Antigen	3.34230586392369	12.4045424070768	243907.03	Male	15	53	Non-Hispanic or Non-Latino	Yes	10	1
47FUR049	Multiple	Multiple (A)	1	1 (Day 0)	80059	Previously Vaccinated	MultipleBoost	15	Hemagglutinin inhibition - A/Indonesia/05/2005 Antigen	PREVAC	09FEB2011	5	.	0	.	Hemagglutinin inhibition	A/Indonesia/05/2005 Antigen	1.6094379124341	11.5376028579325	102498.44	Male	15	40	Non-Hispanic or Non-Latino	Yes	01	2
47FUR049	Multiple	Multiple (A)	1	1 (Day 0)	80059	Previously Vaccinated	MultipleBoost	15	Hemagglutinin inhibition - A/Indonesia/05/2005 Antigen	PREVAC	09FEB2011	5	.	0	.	Hemagglutinin inhibition	A/Indonesia/05/2005 Antigen	1.6094379124341	11.2826523083134	79431.66	Male	15	40	Non-Hispanic or Non-Latino	Yes	01	2
47FUR049	Multiple	Multiple (A)	2	2 (Day 3)	80059	Previously Vaccinated	MultipleBoost	15	Hemagglutinin inhibition - A/Indonesia/05/2005 Antigen	DAY3	11FEB2011	5	1	0	0	Hemagglutinin inhibition	A/Indonesia/05/2005 Antigen	1.6094379124341	11.3652033442739	86267.08	Male	15	40	Non-Hispanic or Non-Latino	Yes	02	2
47FUR049	Multiple	Multiple (A)	2	2 (Day 3)	80059	Previously Vaccinated	MultipleBoost	15	Hemagglutinin inhibition - A/Indonesia/05/2005 Antigen	DAY3	11FEB2011	5	1	0	0	Hemagglutinin inhibition	A/Indonesia/05/2005 Antigen	1.6094379124341	10.8897814720226	53625.58	Male	15	40	Non-Hispanic or Non-Latino	Yes	02	2
47FUR049	Multiple	Multiple (A)	3	3 (Day 7)	80059	Previously Vaccinated	MultipleBoost	15	Hemagglutinin inhibition - A/Indonesia/05/2005 Antigen	DAY7	16FEB2011	5	1	0	0	Hemagglutinin inhibition	A/Indonesia/05/2005 Antigen	1.6094379124341	13.0924598711591	485269.59	Male	15	40	Non-Hispanic or Non-Latino	Yes	03	2
47FUR049	Multiple	Multiple (A)	3	3 (Day 7)	80059	Previously Vaccinated	MultipleBoost	15	Hemagglutinin inhibition - A/Indonesia/05/2005 Antigen	DAY7	16FEB2011	5	1	0	0	Hemagglutinin inhibition	A/Indonesia/05/2005 Antigen	1.6094379124341	12.9564760990306	423570.86	Male	15	40	Non-Hispanic or Non-Latino	Yes	03	2
47FUR049	Multiple	Multiple (A)	4	4 (Day 14)	80059	Previously Vaccinated	MultipleBoost	15	Hemagglutinin inhibition - A/Indonesia/05/2005 Antigen	DAY14	23FEB2011	5	1	0	0	Hemagglutinin inhibition	A/Indonesia/05/2005 Antigen	1.6094379124341	10.8099519638675	49511.09	Male	15	40	Non-Hispanic or Non-Latino	Yes	04	2
47FUR049	Multiple	Multiple (A)	4	4 (Day 14)	80059	Previously Vaccinated	MultipleBoost	15	Hemagglutinin inhibition - A/Indonesia/05/2005 Antigen	DAY14	23FEB2011	5	1	0	0	Hemagglutinin inhibition	A/Indonesia/05/2005 Antigen	1.6094379124341	10.1640532775237	25953.28	Male	15	40	Non-Hispanic or Non-Latino	Yes	04	2
47FUR049	Multiple	Multiple (A)	9	9 (Day 56)	80059	Previously Vaccinated	MultipleBoost	15	Hemagglutinin inhibition - A/Indonesia/05/2005 Antigen	DAY56	06APR2011	5	1	0	0	Hemagglutinin inhibition	A/Indonesia/05/2005 Antigen	1.6094379124341	12.4326723773657	250865.54	Male	15	40	Non-Hispanic or Non-Latino	Yes	09	2
47FUR049	Multiple	Multiple (A)	9	9 (Day 56)	80059	Previously Vaccinated	MultipleBoost	15	Hemagglutinin inhibition - A/Indonesia/05/2005 Antigen	DAY56	06APR2011	5	1	0	0	Hemagglutinin inhibition	A/Indonesia/05/2005 Antigen	1.6094379124341	12.3526544103954	231573.92	Male	15	40	Non-Hispanic or Non-Latino	Yes	09	2
47FUR049	Multiple	Multiple (A)	10	10 (Day 180 or 208)	80059	Previously Vaccinated	MultipleBoost	15	Hemagglutinin inhibition - A/Indonesia/05/2005 Antigen	DAY180	03AUG2011	5	1	0	0	Hemagglutinin inhibition	A/Indonesia/05/2005 Antigen	1.6094379124341	11.9802069550547	159565.05	Male	15	40	Non-Hispanic or Non-Latino	Yes	10	2
47FUR049	Multiple	Multiple (A)	10	10 (Day 180 or 208)	80059	Previously Vaccinated	MultipleBoost	15	Hemagglutinin inhibition - A/Indonesia/05/2005 Antigen	DAY180	03AUG2011	5	1	0	0	Hemagglutinin inhibition	A/Indonesia/05/2005 Antigen	1.6094379124341	11.5030991444274	99022.18	Male	15	40	Non-Hispanic or Non-Latino	Yes	10	2
47FUR051	Multiple	Multiple (A)	1	1 (Day 0)	80059	Previously Vaccinated	MultipleBoost	15	Hemagglutinin inhibition - A/Indonesia/05/2005 Antigen	PREVAC	14FEB2011	5	.	0	.	Hemagglutinin inhibition	A/Indonesia/05/2005 Antigen	1.6094379124341	10.3665820561475	31779.67	Male	15	43	Non-Hispanic or Non-Latino	Yes	01	3
47FUR051	Multiple	Multiple (A)	1	1 (Day 0)	80059	Previously Vaccinated	MultipleBoost	15	Hemagglutinin inhibition - A/Indonesia/05/2005 Antigen	PREVAC	14FEB2011	5	.	0	.	Hemagglutinin inhibition	A/Indonesia/05/2005 Antigen	1.6094379124341	9.98638878611341	21728.69	Male	15	43	Non-Hispanic or Non-Latino	Yes	01	3
47FUR051	Multiple	Multiple (A)	2	2 (Day 3)	80059	Previously Vaccinated	MultipleBoost	15	Hemagglutinin inhibition - A/Indonesia/05/2005 Antigen	DAY3	17FEB2011	5	1	0	0	Hemagglutinin inhibition	A/Indonesia/05/2005 Antigen	1.6094379124341	10.5200471122299	37050.87	Male	15	43	Non-Hispanic or Non-Latino	Yes	02	3
47FUR051	Multiple	Multiple (A)	2	2 (Day 3)	80059	Previously Vaccinated	MultipleBoost	15	Hemagglutinin inhibition - A/Indonesia/05/2005 Antigen	DAY3	17FEB2011	5	1	0	0	Hemagglutinin inhibition	A/Indonesia/05/2005 Antigen	1.6094379124341	10.3558899982791	31441.69	Male	15	43	Non-Hispanic or Non-Latino	Yes	02	3
47FUR051	Multiple	Multiple (A)	3	3 (Day 7)	80059	Previously Vaccinated	MultipleBoost	15	Hemagglutinin inhibition - A/Indonesia/05/2005 Antigen	DAY7	22FEB2011	11.89207115	2.37841423	0	0	Hemagglutinin inhibition	A/Indonesia/05/2005 Antigen	2.47587188813174	12.2672387677676	212615.1	Male	15	43	Non-Hispanic or Non-Latino	Yes	03	3
47FUR051	Multiple	Multiple (A)	3	3 (Day 7)	80059	Previously Vaccinated	MultipleBoost	15	Hemagglutinin inhibition - A/Indonesia/05/2005 Antigen	DAY7	22FEB2011	11.89207115	2.37841423	0	0	Hemagglutinin inhibition	A/Indonesia/05/2005 Antigen	2.47587188813174	11.9059208144641	148141.15	Male	15	43	Non-Hispanic or Non-Latino	Yes	03	3
47FUR051	Multiple	Multiple (A)	4	4 (Day 14)	80059	Previously Vaccinated	MultipleBoost	15	Hemagglutinin inhibition - A/Indonesia/05/2005 Antigen	DAY14	01MAR2011	80	16	1	1	Hemagglutinin inhibition	A/Indonesia/05/2005 Antigen	4.38202663467388	13.2402534117805	562560.19	Male	15	43	Non-Hispanic or Non-Latino	Yes	04	3
47FUR051	Multiple	Multiple (A)	4	4 (Day 14)	80059	Previously Vaccinated	MultipleBoost	15	Hemagglutinin inhibition - A/Indonesia/05/2005 Antigen	DAY14	01MAR2011	80	16	1	1	Hemagglutinin inhibition	A/Indonesia/05/2005 Antigen	4.38202663467388	12.9600506854616	425087.66	Male	15	43	Non-Hispanic or Non-Latino	Yes	04	3
47FUR051	Multiple	Multiple (A)	9	9 (Day 56)	80059	Previously Vaccinated	MultipleBoost	15	Hemagglutinin inhibition - A/Indonesia/05/2005 Antigen	DAY56	14APR2011	95.1365692	19.02731384	1	1	Hemagglutinin inhibition	A/Indonesia/05/2005 Antigen	4.55531342981158	13.0149052855932	449057.08	Male	15	43	Non-Hispanic or Non-Latino	Yes	09	3
47FUR051	Multiple	Multiple (A)	9	9 (Day 56)	80059	Previously Vaccinated	MultipleBoost	15	Hemagglutinin inhibition - A/Indonesia/05/2005 Antigen	DAY56	14APR2011	95.1365692	19.02731384	1	1	Hemagglutinin inhibition	A/Indonesia/05/2005 Antigen	4.55531342981158	12.7448042111706	342766.32	Male	15	43	Non-Hispanic or Non-Latino	Yes	09	3
47FUR051	Multiple	Multiple (A)	10	10 (Day 180 or 208)	80059	Previously Vaccinated	MultipleBoost	15	Hemagglutinin inhibition - A/Indonesia/05/2005 Antigen	DAY180	15AUG2011	28.28427125	5.65685425	0	0	Hemagglutinin inhibition	A/Indonesia/05/2005 Antigen	3.34230586392369	12.5179674593549	273202.2	Male	15	43	Non-Hispanic or Non-Latino	Yes	10	3
47FUR051	Multiple	Multiple (A)	10	10 (Day 180 or 208)	80059	Previously Vaccinated	MultipleBoost	15	Hemagglutinin inhibition - A/Indonesia/05/2005 Antigen	DAY180	15AUG2011	28.28427125	5.65685425	0	0	Hemagglutinin inhibition	A/Indonesia/05/2005 Antigen	3.34230586392369	12.2229018369362	203394.32	Male	15	43	Non-Hispanic or Non-Latino	Yes	10	3
47FUR052	Multiple	Multiple (A)	1	1 (Day 0)	80059	Previously Vaccinated	MultipleBoost	15	Hemagglutinin inhibition - A/Indonesia/05/2005 Antigen	PREVAC	16FEB2011	5	.	0	.	Hemagglutinin inhibition	A/Indonesia/05/2005 Antigen	1.6094379124341	12.2285368746783	204543.69	Female	15	51	Non-Hispanic or Non-Latino	Yes	01	4
47FUR052	Multiple	Multiple (A)	1	1 (Day 0)	80059	Previously Vaccinated	MultipleBoost	15	Hemagglutinin inhibition - A/Indonesia/05/2005 Antigen	PREVAC	16FEB2011	5	.	0	.	Hemagglutinin inhibition	A/Indonesia/05/2005 Antigen	1.6094379124341	12.0140843156767	165063.3	Female	15	51	Non-Hispanic or Non-Latino	Yes	01	4
47FUR052	Multiple	Multiple (A)	2	2 (Day 3)	80059	Previously Vaccinated	MultipleBoost	15	Hemagglutinin inhibition - A/Indonesia/05/2005 Antigen	DAY3	18FEB2011	5	1	0	0	Hemagglutinin inhibition	A/Indonesia/05/2005 Antigen	1.6094379124341	12.2577890478949	210615.41	Female	15	51	Non-Hispanic or Non-Latino	Yes	02	4
47FUR052	Multiple	Multiple (A)	2	2 (Day 3)	80059	Previously Vaccinated	MultipleBoost	15	Hemagglutinin inhibition - A/Indonesia/05/2005 Antigen	DAY3	18FEB2011	5	1	0	0	Hemagglutinin inhibition	A/Indonesia/05/2005 Antigen	1.6094379124341	12.0117806682752	164683.49	Female	15	51	Non-Hispanic or Non-Latino	Yes	02	4
47FUR052	Multiple	Multiple (A)	3	3 (Day 7)	80059	Previously Vaccinated	MultipleBoost	15	Hemagglutinin inhibition - A/Indonesia/05/2005 Antigen	DAY7	22FEB2011	5	1	0	0	Hemagglutinin inhibition	A/Indonesia/05/2005 Antigen	1.6094379124341	12.3066584302811	221163.7	Female	15	51	Non-Hispanic or Non-Latino	Yes	03	4
47FUR052	Multiple	Multiple (A)	3	3 (Day 7)	80059	Previously Vaccinated	MultipleBoost	15	Hemagglutinin inhibition - A/Indonesia/05/2005 Antigen	DAY7	22FEB2011	5	1	0	0	Hemagglutinin inhibition	A/Indonesia/05/2005 Antigen	1.6094379124341	12.1341439508714	186119.45	Female	15	51	Non-Hispanic or Non-Latino	Yes	03	4
47FUR052	Multiple	Multiple (A)	4	4 (Day 14)	80059	Previously Vaccinated	MultipleBoost	15	Hemagglutinin inhibition - A/Indonesia/05/2005 Antigen	DAY14	01MAR2011	5	1	0	0	Hemagglutinin inhibition	A/Indonesia/05/2005 Antigen	1.6094379124341	12.0545913995918	171886.8	Female	15	51	Non-Hispanic or Non-Latino	Yes	04	4
47FUR052	Multiple	Multiple (A)	4	4 (Day 14)	80059	Previously Vaccinated	MultipleBoost	15	Hemagglutinin inhibition - A/Indonesia/05/2005 Antigen	DAY14	01MAR2011	5	1	0	0	Hemagglutinin inhibition	A/Indonesia/05/2005 Antigen	1.6094379124341	11.8354081598124	138055.1	Female	15	51	Non-Hispanic or Non-Latino	Yes	04	4
47FUR052	Multiple	Multiple (A)	5	5 (Day 28)	80059	Previously Vaccinated	MultipleBoost	15	Hemagglutinin inhibition - A/Indonesia/05/2005 Antigen	DAY28	15MAR2011	5	1	0	0	Hemagglutinin inhibition	A/Indonesia/05/2005 Antigen	1.6094379124341	12.2679347601599	212763.13	Female	15	51	Non-Hispanic or Non-Latino	Yes	05	4
47FUR052	Multiple	Multiple (A)	5	5 (Day 28)	80059	Previously Vaccinated	MultipleBoost	15	Hemagglutinin inhibition - A/Indonesia/05/2005 Antigen	DAY28	15MAR2011	5	1	0	0	Hemagglutinin inhibition	A/Indonesia/05/2005 Antigen	1.6094379124341	12.0117806682752	164683.49	Female	15	51	Non-Hispanic or Non-Latino	Yes	05	4
47FUR052	Multiple	Multiple (A)	10	10 (Day 180 or 208)	80059	Previously Vaccinated	MultipleBoost	15	Hemagglutinin inhibition - A/Indonesia/05/2005 Antigen	DAY180	17AUG2011	5	1	0	0	Hemagglutinin inhibition	A/Indonesia/05/2005 Antigen	1.6094379124341	12.4573489341948	257133.05	Female	15	51	Non-Hispanic or Non-Latino	Yes	10	4
47FUR052	Multiple	Multiple (A)	10	10 (Day 180 or 208)	80059	Previously Vaccinated	MultipleBoost	15	Hemagglutinin inhibition - A/Indonesia/05/2005 Antigen	DAY180	17AUG2011	5	1	0	0	Hemagglutinin inhibition	A/Indonesia/05/2005 Antigen	1.6094379124341	12.2152107654412	201836	Female	15	51	Non-Hispanic or Non-Latino	Yes	10	4
47FUR053	Multiple	Multiple (A)	1	1 (Day 0)	80059	Previously Vaccinated	MultipleBoost	15	Hemagglutinin inhibition - A/Indonesia/05/2005 Antigen	PREVAC	22FEB2011	5	.	0	.	Hemagglutinin inhibition	A/Indonesia/05/2005 Antigen	1.6094379124341	13.1537721760845	515953.63	Female	15	47	Non-Hispanic or Non-Latino	Yes	01	3
47FUR053	Multiple	Multiple (A)	1	1 (Day 0)	80059	Previously Vaccinated	MultipleBoost	15	Hemagglutinin inhibition - A/Indonesia/05/2005 Antigen	PREVAC	22FEB2011	5	.	0	.	Hemagglutinin inhibition	A/Indonesia/05/2005 Antigen	1.6094379124341	13.0112638696338	447424.85	Female	15	47	Non-Hispanic or Non-Latino	Yes	01	3
47FUR053	Multiple	Multiple (A)	2	2 (Day 3)	80059	Previously Vaccinated	MultipleBoost	15	Hemagglutinin inhibition - A/Indonesia/05/2005 Antigen	DAY3	25FEB2011	5	1	0	0	Hemagglutinin inhibition	A/Indonesia/05/2005 Antigen	1.6094379124341	12.7098391824659	330988.59	Female	15	47	Non-Hispanic or Non-Latino	Yes	02	3
47FUR053	Multiple	Multiple (A)	2	2 (Day 3)	80059	Previously Vaccinated	MultipleBoost	15	Hemagglutinin inhibition - A/Indonesia/05/2005 Antigen	DAY3	25FEB2011	5	1	0	0	Hemagglutinin inhibition	A/Indonesia/05/2005 Antigen	1.6094379124341	12.6467782485293	310760.64	Female	15	47	Non-Hispanic or Non-Latino	Yes	02	3
47FUR053	Multiple	Multiple (A)	3	3 (Day 7)	80059	Previously Vaccinated	MultipleBoost	15	Hemagglutinin inhibition - A/Indonesia/05/2005 Antigen	DAY7	01MAR2011	113.137085	22.627417	1	1	Hemagglutinin inhibition	A/Indonesia/05/2005 Antigen	4.72860022504359	13.5619542800438	776036.07	Female	15	47	Non-Hispanic or Non-Latino	Yes	03	3
47FUR053	Multiple	Multiple (A)	3	3 (Day 7)	80059	Previously Vaccinated	MultipleBoost	15	Hemagglutinin inhibition - A/Indonesia/05/2005 Antigen	DAY7	01MAR2011	113.137085	22.627417	1	1	Hemagglutinin inhibition	A/Indonesia/05/2005 Antigen	4.72860022504359	13.3405055144712	621881.92	Female	15	47	Non-Hispanic or Non-Latino	Yes	03	3
47FUR053	Multiple	Multiple (A)	4	4 (Day 14)	80059	Previously Vaccinated	MultipleBoost	15	Hemagglutinin inhibition - A/Indonesia/05/2005 Antigen	DAY14	08MAR2011	452.54834	90.50966799	1	1	Hemagglutinin inhibition	A/Indonesia/05/2005 Antigen	6.11489458616348	14.1303212978043	1370000	Female	15	47	Non-Hispanic or Non-Latino	Yes	04	3
47FUR053	Multiple	Multiple (A)	4	4 (Day 14)	80059	Previously Vaccinated	MultipleBoost	15	Hemagglutinin inhibition - A/Indonesia/05/2005 Antigen	DAY14	08MAR2011	452.54834	90.50966799	1	1	Hemagglutinin inhibition	A/Indonesia/05/2005 Antigen	6.11489458616348	13.9978321147582	1200000	Female	15	47	Non-Hispanic or Non-Latino	Yes	04	3
47FUR053	Multiple	Multiple (A)	5	5 (Day 28)	80059	Previously Vaccinated	MultipleBoost	15	Hemagglutinin inhibition - A/Indonesia/05/2005 Antigen	DAY28	22MAR2011	640	128	1	1	Hemagglutinin inhibition	A/Indonesia/05/2005 Antigen	6.46146817635371	14.3283341843929	1670000	Female	15	47	Non-Hispanic or Non-Latino	Yes	05	3
47FUR053	Multiple	Multiple (A)	5	5 (Day 28)	80059	Previously Vaccinated	MultipleBoost	15	Hemagglutinin inhibition - A/Indonesia/05/2005 Antigen	DAY28	22MAR2011	640	128	1	1	Hemagglutinin inhibition	A/Indonesia/05/2005 Antigen	6.46146817635371	14.3040905727829	1630000	Female	15	47	Non-Hispanic or Non-Latino	Yes	05	3
47FUR053	Multiple	Multiple (A)	9	9 (Day 56)	80059	Previously Vaccinated	MultipleBoost	15	Hemagglutinin inhibition - A/Indonesia/05/2005 Antigen	DAY56	19APR2011	226.27417	45.254834	1	1	Hemagglutinin inhibition	A/Indonesia/05/2005 Antigen	5.42174740560353	12.0938083535555	178761.6	Female	15	47	Non-Hispanic or Non-Latino	Yes	09	3
47FUR053	Multiple	Multiple (A)	9	9 (Day 56)	80059	Previously Vaccinated	MultipleBoost	15	Hemagglutinin inhibition - A/Indonesia/05/2005 Antigen	DAY56	19APR2011	226.27417	45.254834	1	1	Hemagglutinin inhibition	A/Indonesia/05/2005 Antigen	5.42174740560353	11.8060057408685	134055.04	Female	15	47	Non-Hispanic or Non-Latino	Yes	09	3
47FUR053	Multiple	Multiple (A)	10	10 (Day 180 or 208)	80059	Previously Vaccinated	MultipleBoost	15	Hemagglutinin inhibition - A/Indonesia/05/2005 Antigen	DAY180	24AUG2011	113.137085	22.627417	1	1	Hemagglutinin inhibition	A/Indonesia/05/2005 Antigen	4.72860022504359	13.6816776798975	874736.24	Female	15	47	Non-Hispanic or Non-Latino	Yes	10	3
47FUR053	Multiple	Multiple (A)	10	10 (Day 180 or 208)	80059	Previously Vaccinated	MultipleBoost	15	Hemagglutinin inhibition - A/Indonesia/05/2005 Antigen	DAY180	24AUG2011	113.137085	22.627417	1	1	Hemagglutinin inhibition	A/Indonesia/05/2005 Antigen	4.72860022504359	13.6406807478242	839599.9	Female	15	47	Non-Hispanic or Non-Latino	Yes	10	3
47FUR054	Multiple	Multiple (A)	1	1 (Day 0)	80059	Previously Vaccinated	MultipleBoost	15	Hemagglutinin inhibition - A/Indonesia/05/2005 Antigen	PREVAC	22FEB2011	5	.	0	.	Hemagglutinin inhibition	A/Indonesia/05/2005 Antigen	1.6094379124341	11.8023455512006	133565.27	Female	15	45	Non-Hispanic or Non-Latino	Yes	01	1
47FUR054	Multiple	Multiple (A)	1	1 (Day 0)	80059	Previously Vaccinated	MultipleBoost	15	Hemagglutinin inhibition - A/Indonesia/05/2005 Antigen	PREVAC	22FEB2011	5	.	0	.	Hemagglutinin inhibition	A/Indonesia/05/2005 Antigen	1.6094379124341	11.5379473891852	102533.76	Female	15	45	Non-Hispanic or Non-Latino	Yes	01	1
47FUR054	Multiple	Multiple (A)	2	2 (Day 3)	80059	Previously Vaccinated	MultipleBoost	15	Hemagglutinin inhibition - A/Indonesia/05/2005 Antigen	DAY3	25FEB2011	5	1	0	0	Hemagglutinin inhibition	A/Indonesia/05/2005 Antigen	1.6094379124341	11.890846562447	145924.78	Female	15	45	Non-Hispanic or Non-Latino	Yes	02	1
47FUR054	Multiple	Multiple (A)	2	2 (Day 3)	80059	Previously Vaccinated	MultipleBoost	15	Hemagglutinin inhibition - A/Indonesia/05/2005 Antigen	DAY3	25FEB2011	5	1	0	0	Hemagglutinin inhibition	A/Indonesia/05/2005 Antigen	1.6094379124341	11.7200607652292	123014.9	Female	15	45	Non-Hispanic or Non-Latino	Yes	02	1
47FUR054	Multiple	Multiple (A)	3	3 (Day 7)	80059	Previously Vaccinated	MultipleBoost	15	Hemagglutinin inhibition - A/Indonesia/05/2005 Antigen	DAY7	01MAR2011	5	1	0	0	Hemagglutinin inhibition	A/Indonesia/05/2005 Antigen	1.6094379124341	11.8702128413339	142944.66	Female	15	45	Non-Hispanic or Non-Latino	Yes	03	1
47FUR054	Multiple	Multiple (A)	3	3 (Day 7)	80059	Previously Vaccinated	MultipleBoost	15	Hemagglutinin inhibition - A/Indonesia/05/2005 Antigen	DAY7	01MAR2011	5	1	0	0	Hemagglutinin inhibition	A/Indonesia/05/2005 Antigen	1.6094379124341	11.7831808204143	131029.9	Female	15	45	Non-Hispanic or Non-Latino	Yes	03	1
47FUR054	Multiple	Multiple (A)	4	4 (Day 14)	80059	Previously Vaccinated	MultipleBoost	15	Hemagglutinin inhibition - A/Indonesia/05/2005 Antigen	DAY14	08MAR2011	20	4	0	0	Hemagglutinin inhibition	A/Indonesia/05/2005 Antigen	2.99573227355399	12.3645815857569	234352.48	Female	15	45	Non-Hispanic or Non-Latino	Yes	04	1
47FUR054	Multiple	Multiple (A)	4	4 (Day 14)	80059	Previously Vaccinated	MultipleBoost	15	Hemagglutinin inhibition - A/Indonesia/05/2005 Antigen	DAY14	08MAR2011	20	4	0	0	Hemagglutinin inhibition	A/Indonesia/05/2005 Antigen	2.99573227355399	12.3002586482295	219752.82	Female	15	45	Non-Hispanic or Non-Latino	Yes	04	1
47FUR054	Multiple	Multiple (A)	5	5 (Day 28)	80059	Previously Vaccinated	MultipleBoost	15	Hemagglutinin inhibition - A/Indonesia/05/2005 Antigen	DAY28	22MAR2011	20	4	0	0	Hemagglutinin inhibition	A/Indonesia/05/2005 Antigen	2.99573227355399	12.2400655347011	206915.45	Female	15	45	Non-Hispanic or Non-Latino	Yes	05	1
47FUR054	Multiple	Multiple (A)	5	5 (Day 28)	80059	Previously Vaccinated	MultipleBoost	15	Hemagglutinin inhibition - A/Indonesia/05/2005 Antigen	DAY28	22MAR2011	20	4	0	0	Hemagglutinin inhibition	A/Indonesia/05/2005 Antigen	2.99573227355399	12.0621700575014	173194.42	Female	15	45	Non-Hispanic or Non-Latino	Yes	05	1
47FUR054	Multiple	Multiple (A)	9	9 (Day 56)	80059	Previously Vaccinated	MultipleBoost	15	Hemagglutinin inhibition - A/Indonesia/05/2005 Antigen	DAY56	20APR2011	40	8	1	1	Hemagglutinin inhibition	A/Indonesia/05/2005 Antigen	3.68887945411393	12.2998716841355	219667.8	Female	15	45	Non-Hispanic or Non-Latino	Yes	09	1
47FUR054	Multiple	Multiple (A)	9	9 (Day 56)	80059	Previously Vaccinated	MultipleBoost	15	Hemagglutinin inhibition - A/Indonesia/05/2005 Antigen	DAY56	20APR2011	40	8	1	1	Hemagglutinin inhibition	A/Indonesia/05/2005 Antigen	3.68887945411393	12.1132781786648	182276.16	Female	15	45	Non-Hispanic or Non-Latino	Yes	09	1
47FUR054	Multiple	Multiple (A)	10	10 (Day 180 or 208)	80059	Previously Vaccinated	MultipleBoost	15	Hemagglutinin inhibition - A/Indonesia/05/2005 Antigen	DAY180	15AUG2011	5	1	0	0	Hemagglutinin inhibition	A/Indonesia/05/2005 Antigen	1.6094379124341	11.8113574000495	134774.38	Female	15	45	Non-Hispanic or Non-Latino	Yes	10	1
47FUR054	Multiple	Multiple (A)	10	10 (Day 180 or 208)	80059	Previously Vaccinated	MultipleBoost	15	Hemagglutinin inhibition - A/Indonesia/05/2005 Antigen	DAY180	15AUG2011	5	1	0	0	Hemagglutinin inhibition	A/Indonesia/05/2005 Antigen	1.6094379124341	11.5989546180692	108983.81	Female	15	45	Non-Hispanic or Non-Latino	Yes	10	1
47FUR055	Unprimed15	Unprimed (B)	1	1 (Day 0)	80059	Na&#195;&#175;ve	Na&#195;&#175;ve	15	Hemagglutinin inhibition - A/Indonesia/05/2005 Antigen	PREVAC	23FEB2011	5	.	0	.	Hemagglutinin inhibition	A/Indonesia/05/2005 Antigen	1.6094379124341	10.2749938659509	28998.34	Female	15	29	Non-Hispanic or Non-Latino	Yes	01	1
47FUR055	Unprimed15	Unprimed (B)	1	1 (Day 0)	80059	Na&#195;&#175;ve	Na&#195;&#175;ve	15	Hemagglutinin inhibition - A/Indonesia/05/2005 Antigen	PREVAC	23FEB2011	5	.	0	.	Hemagglutinin inhibition	A/Indonesia/05/2005 Antigen	1.6094379124341	10.1093079201917	24570.65	Female	15	29	Non-Hispanic or Non-Latino	Yes	01	1
47FUR055	Unprimed15	Unprimed (B)	2	2 (Day 3)	80059	Na&#195;&#175;ve	Na&#195;&#175;ve	15	Hemagglutinin inhibition - A/Indonesia/05/2005 Antigen	D3POSTVAC1	25FEB2011	5	1	0	0	Hemagglutinin inhibition	A/Indonesia/05/2005 Antigen	1.6094379124341	10.4316964086329	33917.84	Female	15	29	Non-Hispanic or Non-Latino	Yes	02	1
47FUR055	Unprimed15	Unprimed (B)	2	2 (Day 3)	80059	Na&#195;&#175;ve	Na&#195;&#175;ve	15	Hemagglutinin inhibition - A/Indonesia/05/2005 Antigen	D3POSTVAC1	25FEB2011	5	1	0	0	Hemagglutinin inhibition	A/Indonesia/05/2005 Antigen	1.6094379124341	10.134006637608	25185.07	Female	15	29	Non-Hispanic or Non-Latino	Yes	02	1
47FUR055	Unprimed15	Unprimed (B)	3	3 (Day 7)	80059	Na&#195;&#175;ve	Na&#195;&#175;ve	15	Hemagglutinin inhibition - A/Indonesia/05/2005 Antigen	D7POSTVAC1	02MAR2011	5	1	0	0	Hemagglutinin inhibition	A/Indonesia/05/2005 Antigen	1.6094379124341	10.4360709498771	34066.54	Female	15	29	Non-Hispanic or Non-Latino	Yes	03	1
47FUR055	Unprimed15	Unprimed (B)	3	3 (Day 7)	80059	Na&#195;&#175;ve	Na&#195;&#175;ve	15	Hemagglutinin inhibition - A/Indonesia/05/2005 Antigen	D7POSTVAC1	02MAR2011	5	1	0	0	Hemagglutinin inhibition	A/Indonesia/05/2005 Antigen	1.6094379124341	10.2964035826376	29625.88	Female	15	29	Non-Hispanic or Non-Latino	Yes	03	1
47FUR055	Unprimed15	Unprimed (B)	4	4 (Day 14)	80059	Na&#195;&#175;ve	Na&#195;&#175;ve	15	Hemagglutinin inhibition - A/Indonesia/05/2005 Antigen	D14POSTVAC1	09MAR2011	5	1	0	0	Hemagglutinin inhibition	A/Indonesia/05/2005 Antigen	1.6094379124341	10.1916162752248	26678.58	Female	15	29	Non-Hispanic or Non-Latino	Yes	04	1
47FUR055	Unprimed15	Unprimed (B)	4	4 (Day 14)	80059	Na&#195;&#175;ve	Na&#195;&#175;ve	15	Hemagglutinin inhibition - A/Indonesia/05/2005 Antigen	D14POSTVAC1	09MAR2011	5	1	0	0	Hemagglutinin inhibition	A/Indonesia/05/2005 Antigen	1.6094379124341	10.0579367592283	23340.3	Female	15	29	Non-Hispanic or Non-Latino	Yes	04	1
47FUR055	Unprimed15	Unprimed (B)	5	5 (Day 28)	80059	Na&#195;&#175;ve	Na&#195;&#175;ve	15	Hemagglutinin inhibition - A/Indonesia/05/2005 Antigen	D28POSTVAC1	22MAR2011	5	1	0	0	Hemagglutinin inhibition	A/Indonesia/05/2005 Antigen	1.6094379124341	10.344591646551	31088.45	Female	15	29	Non-Hispanic or Non-Latino	Yes	05	1
47FUR055	Unprimed15	Unprimed (B)	5	5 (Day 28)	80059	Na&#195;&#175;ve	Na&#195;&#175;ve	15	Hemagglutinin inhibition - A/Indonesia/05/2005 Antigen	D28POSTVAC1	22MAR2011	5	1	0	0	Hemagglutinin inhibition	A/Indonesia/05/2005 Antigen	1.6094379124341	10.0839628226579	23955.73	Female	15	29	Non-Hispanic or Non-Latino	Yes	05	1
47FUR055	Unprimed15	Unprimed (B)	6	6 (Day 31)	80059	Na&#195;&#175;ve	Na&#195;&#175;ve	15	Hemagglutinin inhibition - A/Indonesia/05/2005 Antigen	D3POSTVAC2	24MAR2011	5	1	0	0	Hemagglutinin inhibition	A/Indonesia/05/2005 Antigen	1.6094379124341	10.112647385816	24652.84	Female	15	29	Non-Hispanic or Non-Latino	Yes	06	1
47FUR055	Unprimed15	Unprimed (B)	6	6 (Day 31)	80059	Na&#195;&#175;ve	Na&#195;&#175;ve	15	Hemagglutinin inhibition - A/Indonesia/05/2005 Antigen	D3POSTVAC2	24MAR2011	5	1	0	0	Hemagglutinin inhibition	A/Indonesia/05/2005 Antigen	1.6094379124341	9.83663809657772	18706.72	Female	15	29	Non-Hispanic or Non-Latino	Yes	06	1
47FUR055	Unprimed15	Unprimed (B)	7	7 (Day 35)	80059	Na&#195;&#175;ve	Na&#195;&#175;ve	15	Hemagglutinin inhibition - A/Indonesia/05/2005 Antigen	D7POSTVAC2	28MAR2011	5	1	0	0	Hemagglutinin inhibition	A/Indonesia/05/2005 Antigen	1.6094379124341	10.5722495669891	39036.39	Female	15	29	Non-Hispanic or Non-Latino	Yes	07	1
47FUR055	Unprimed15	Unprimed (B)	7	7 (Day 35)	80059	Na&#195;&#175;ve	Na&#195;&#175;ve	15	Hemagglutinin inhibition - A/Indonesia/05/2005 Antigen	D7POSTVAC2	28MAR2011	5	1	0	0	Hemagglutinin inhibition	A/Indonesia/05/2005 Antigen	1.6094379124341	10.1699127908453	26105.8	Female	15	29	Non-Hispanic or Non-Latino	Yes	07	1
47FUR055	Unprimed15	Unprimed (B)	8	8 (Day 42)	80059	Na&#195;&#175;ve	Na&#195;&#175;ve	15	Hemagglutinin inhibition - A/Indonesia/05/2005 Antigen	D14POSTVAC2	04APR2011	5	1	0	0	Hemagglutinin inhibition	A/Indonesia/05/2005 Antigen	1.6094379124341	10.4640334791869	35032.57	Female	15	29	Non-Hispanic or Non-Latino	Yes	08	1
47FUR055	Unprimed15	Unprimed (B)	8	8 (Day 42)	80059	Na&#195;&#175;ve	Na&#195;&#175;ve	15	Hemagglutinin inhibition - A/Indonesia/05/2005 Antigen	D14POSTVAC2	04APR2011	5	1	0	0	Hemagglutinin inhibition	A/Indonesia/05/2005 Antigen	1.6094379124341	10.1521261261312	25645.57	Female	15	29	Non-Hispanic or Non-Latino	Yes	08	1
47FUR055	Unprimed15	Unprimed (B)	9	9 (Day 56)	80059	Na&#195;&#175;ve	Na&#195;&#175;ve	15	Hemagglutinin inhibition - A/Indonesia/05/2005 Antigen	D28POSTVAC2	19APR2011	5	1	0	0	Hemagglutinin inhibition	A/Indonesia/05/2005 Antigen	1.6094379124341	10.7454184651611	46416.88	Female	15	29	Non-Hispanic or Non-Latino	Yes	09	1
47FUR055	Unprimed15	Unprimed (B)	9	9 (Day 56)	80059	Na&#195;&#175;ve	Na&#195;&#175;ve	15	Hemagglutinin inhibition - A/Indonesia/05/2005 Antigen	D28POSTVAC2	19APR2011	5	1	0	0	Hemagglutinin inhibition	A/Indonesia/05/2005 Antigen	1.6094379124341	10.4264704759476	33741.05	Female	15	29	Non-Hispanic or Non-Latino	Yes	09	1
47FUR055	Unprimed15	Unprimed (B)	10	10 (Day 180 or 208)	80059	Na&#195;&#175;ve	Na&#195;&#175;ve	15	Hemagglutinin inhibition - A/Indonesia/05/2005 Antigen	6MOVAC2	13OCT2011	5	1	0	0	Hemagglutinin inhibition	A/Indonesia/05/2005 Antigen	1.6094379124341	10.8127925408225	49651.93	Female	15	29	Non-Hispanic or Non-Latino	Yes	10	1
47FUR055	Unprimed15	Unprimed (B)	10	10 (Day 180 or 208)	80059	Na&#195;&#175;ve	Na&#195;&#175;ve	15	Hemagglutinin inhibition - A/Indonesia/05/2005 Antigen	6MOVAC2	13OCT2011	5	1	0	0	Hemagglutinin inhibition	A/Indonesia/05/2005 Antigen	1.6094379124341	10.5918334754831	39808.41	Female	15	29	Non-Hispanic or Non-Latino	Yes	10	1
47FUR057	Multiple	Multiple (A)	1	1 (Day 0)	80059	Previously Vaccinated	MultipleBoost	15	Hemagglutinin inhibition - A/Indonesia/05/2005 Antigen	PREVAC	24FEB2011	7.071067812	.	0	.	Hemagglutinin inhibition	A/Indonesia/05/2005 Antigen	1.95601150273309	12.9836448175163	435236.49	Female	15	53	Non-Hispanic or Non-Latino	Yes	01	2
47FUR057	Multiple	Multiple (A)	1	1 (Day 0)	80059	Previously Vaccinated	MultipleBoost	15	Hemagglutinin inhibition - A/Indonesia/05/2005 Antigen	PREVAC	24FEB2011	7.071067812	.	0	.	Hemagglutinin inhibition	A/Indonesia/05/2005 Antigen	1.95601150273309	12.701958210329	328390.33	Female	15	53	Non-Hispanic or Non-Latino	Yes	01	2
47FUR057	Multiple	Multiple (A)	2	2 (Day 3)	80059	Previously Vaccinated	MultipleBoost	15	Hemagglutinin inhibition - A/Indonesia/05/2005 Antigen	DAY3	28FEB2011	7.071067812	1	0	0	Hemagglutinin inhibition	A/Indonesia/05/2005 Antigen	1.95601150273309	12.8571306488245	383513.71	Female	15	53	Non-Hispanic or Non-Latino	Yes	02	2
47FUR057	Multiple	Multiple (A)	2	2 (Day 3)	80059	Previously Vaccinated	MultipleBoost	15	Hemagglutinin inhibition - A/Indonesia/05/2005 Antigen	DAY3	28FEB2011	7.071067812	1	0	0	Hemagglutinin inhibition	A/Indonesia/05/2005 Antigen	1.95601150273309	12.6160399701013	301353.71	Female	15	53	Non-Hispanic or Non-Latino	Yes	02	2
47FUR057	Multiple	Multiple (A)	3	3 (Day 7)	80059	Previously Vaccinated	MultipleBoost	15	Hemagglutinin inhibition - A/Indonesia/05/2005 Antigen	DAY7	03MAR2011	28.28427125	4	0	0	Hemagglutinin inhibition	A/Indonesia/05/2005 Antigen	3.34230586392369	13.6690457394224	863756.12	Female	15	53	Non-Hispanic or Non-Latino	Yes	03	2
47FUR057	Multiple	Multiple (A)	3	3 (Day 7)	80059	Previously Vaccinated	MultipleBoost	15	Hemagglutinin inhibition - A/Indonesia/05/2005 Antigen	DAY7	03MAR2011	28.28427125	4	0	0	Hemagglutinin inhibition	A/Indonesia/05/2005 Antigen	3.34230586392369	13.5819621003681	791719.23	Female	15	53	Non-Hispanic or Non-Latino	Yes	03	2
47FUR057	Multiple	Multiple (A)	4	4 (Day 14)	80059	Previously Vaccinated	MultipleBoost	15	Hemagglutinin inhibition - A/Indonesia/05/2005 Antigen	DAY14	10MAR2011	56.5685425	8	1	1	Hemagglutinin inhibition	A/Indonesia/05/2005 Antigen	4.03545304448364	13.7327170043476	920541.17	Female	15	53	Non-Hispanic or Non-Latino	Yes	04	2
47FUR057	Multiple	Multiple (A)	4	4 (Day 14)	80059	Previously Vaccinated	MultipleBoost	15	Hemagglutinin inhibition - A/Indonesia/05/2005 Antigen	DAY14	10MAR2011	56.5685425	8	1	1	Hemagglutinin inhibition	A/Indonesia/05/2005 Antigen	4.03545304448364	13.5524655908713	768707.33	Female	15	53	Non-Hispanic or Non-Latino	Yes	04	2
47FUR057	Multiple	Multiple (A)	9	9 (Day 56)	80059	Previously Vaccinated	MultipleBoost	15	Hemagglutinin inhibition - A/Indonesia/05/2005 Antigen	DAY56	22APR2011	56.5685425	8	1	1	Hemagglutinin inhibition	A/Indonesia/05/2005 Antigen	4.03545304448364	13.6773976576715	871000.35	Female	15	53	Non-Hispanic or Non-Latino	Yes	09	2
47FUR057	Multiple	Multiple (A)	9	9 (Day 56)	80059	Previously Vaccinated	MultipleBoost	15	Hemagglutinin inhibition - A/Indonesia/05/2005 Antigen	DAY56	22APR2011	56.5685425	8	1	1	Hemagglutinin inhibition	A/Indonesia/05/2005 Antigen	4.03545304448364	13.5266655962855	749128.34	Female	15	53	Non-Hispanic or Non-Latino	Yes	09	2
47FUR057	Multiple	Multiple (A)	10	10 (Day 180 or 208)	80059	Previously Vaccinated	MultipleBoost	15	Hemagglutinin inhibition - A/Indonesia/05/2005 Antigen	DAY180	18AUG2011	20	2.828427125	0	0	Hemagglutinin inhibition	A/Indonesia/05/2005 Antigen	2.99573227355399	13.2939425744396	593589.08	Female	15	53	Non-Hispanic or Non-Latino	Yes	10	2
47FUR057	Multiple	Multiple (A)	10	10 (Day 180 or 208)	80059	Previously Vaccinated	MultipleBoost	15	Hemagglutinin inhibition - A/Indonesia/05/2005 Antigen	DAY180	18AUG2011	20	2.828427125	0	0	Hemagglutinin inhibition	A/Indonesia/05/2005 Antigen	2.99573227355399	13.0588097577586	469211.9	Female	15	53	Non-Hispanic or Non-Latino	Yes	10	2
47FUR058	Unprimed15	Unprimed (B)	1	1 (Day 0)	80059	Na&#195;&#175;ve	Na&#195;&#175;ve	15	Hemagglutinin inhibition - A/Indonesia/05/2005 Antigen	PREVAC	28FEB2011	5	.	0	.	Hemagglutinin inhibition	A/Indonesia/05/2005 Antigen	1.6094379124341	10.9047236620255	54432.88	Female	15	45	Non-Hispanic or Non-Latino	Yes	01	2
47FUR058	Unprimed15	Unprimed (B)	1	1 (Day 0)	80059	Na&#195;&#175;ve	Na&#195;&#175;ve	15	Hemagglutinin inhibition - A/Indonesia/05/2005 Antigen	PREVAC	28FEB2011	5	.	0	.	Hemagglutinin inhibition	A/Indonesia/05/2005 Antigen	1.6094379124341	10.4194493634812	33504.98	Female	15	45	Non-Hispanic or Non-Latino	Yes	01	2
47FUR058	Unprimed15	Unprimed (B)	2	2 (Day 3)	80059	Na&#195;&#175;ve	Na&#195;&#175;ve	15	Hemagglutinin inhibition - A/Indonesia/05/2005 Antigen	D3POSTVAC1	04MAR2011	5	1	0	0	Hemagglutinin inhibition	A/Indonesia/05/2005 Antigen	1.6094379124341	10.8789995690684	53050.5	Female	15	45	Non-Hispanic or Non-Latino	Yes	02	2
47FUR058	Unprimed15	Unprimed (B)	2	2 (Day 3)	80059	Na&#195;&#175;ve	Na&#195;&#175;ve	15	Hemagglutinin inhibition - A/Indonesia/05/2005 Antigen	D3POSTVAC1	04MAR2011	5	1	0	0	Hemagglutinin inhibition	A/Indonesia/05/2005 Antigen	1.6094379124341	10.5299368154725	37419.11	Female	15	45	Non-Hispanic or Non-Latino	Yes	02	2
47FUR058	Unprimed15	Unprimed (B)	3	3 (Day 7)	80059	Na&#195;&#175;ve	Na&#195;&#175;ve	15	Hemagglutinin inhibition - A/Indonesia/05/2005 Antigen	D7POSTVAC1	08MAR2011	5	1	0	0	Hemagglutinin inhibition	A/Indonesia/05/2005 Antigen	1.6094379124341	11.434674692488	92473.25	Female	15	45	Non-Hispanic or Non-Latino	Yes	03	2
47FUR058	Unprimed15	Unprimed (B)	3	3 (Day 7)	80059	Na&#195;&#175;ve	Na&#195;&#175;ve	15	Hemagglutinin inhibition - A/Indonesia/05/2005 Antigen	D7POSTVAC1	08MAR2011	5	1	0	0	Hemagglutinin inhibition	A/Indonesia/05/2005 Antigen	1.6094379124341	11.2331152612345	75592.72	Female	15	45	Non-Hispanic or Non-Latino	Yes	03	2
47FUR058	Unprimed15	Unprimed (B)	4	4 (Day 14)	80059	Na&#195;&#175;ve	Na&#195;&#175;ve	15	Hemagglutinin inhibition - A/Indonesia/05/2005 Antigen	D14POSTVAC1	14MAR2011	5	1	0	0	Hemagglutinin inhibition	A/Indonesia/05/2005 Antigen	1.6094379124341	10.8648170398844	52303.42	Female	15	45	Non-Hispanic or Non-Latino	Yes	04	2
47FUR058	Unprimed15	Unprimed (B)	4	4 (Day 14)	80059	Na&#195;&#175;ve	Na&#195;&#175;ve	15	Hemagglutinin inhibition - A/Indonesia/05/2005 Antigen	D14POSTVAC1	14MAR2011	5	1	0	0	Hemagglutinin inhibition	A/Indonesia/05/2005 Antigen	1.6094379124341	10.2056226746576	27054.88	Female	15	45	Non-Hispanic or Non-Latino	Yes	04	2
47FUR058	Unprimed15	Unprimed (B)	5	5 (Day 28)	80059	Na&#195;&#175;ve	Na&#195;&#175;ve	15	Hemagglutinin inhibition - A/Indonesia/05/2005 Antigen	D28POSTVAC1	28MAR2011	5	1	0	0	Hemagglutinin inhibition	A/Indonesia/05/2005 Antigen	1.6094379124341	10.6145998889614	40725.1	Female	15	45	Non-Hispanic or Non-Latino	Yes	05	2
47FUR058	Unprimed15	Unprimed (B)	5	5 (Day 28)	80059	Na&#195;&#175;ve	Na&#195;&#175;ve	15	Hemagglutinin inhibition - A/Indonesia/05/2005 Antigen	D28POSTVAC1	28MAR2011	5	1	0	0	Hemagglutinin inhibition	A/Indonesia/05/2005 Antigen	1.6094379124341	9.65259760557884	15562.16	Female	15	45	Non-Hispanic or Non-Latino	Yes	05	2
47FUR058	Unprimed15	Unprimed (B)	6	6 (Day 31)	80059	Na&#195;&#175;ve	Na&#195;&#175;ve	15	Hemagglutinin inhibition - A/Indonesia/05/2005 Antigen	D3POSTVAC2	30MAR2011	5	1	0	0	Hemagglutinin inhibition	A/Indonesia/05/2005 Antigen	1.6094379124341	10.5665550927419	38814.73	Female	15	45	Non-Hispanic or Non-Latino	Yes	06	2
47FUR058	Unprimed15	Unprimed (B)	6	6 (Day 31)	80059	Na&#195;&#175;ve	Na&#195;&#175;ve	15	Hemagglutinin inhibition - A/Indonesia/05/2005 Antigen	D3POSTVAC2	30MAR2011	5	1	0	0	Hemagglutinin inhibition	A/Indonesia/05/2005 Antigen	1.6094379124341	9.85944945439436	19138.35	Female	15	45	Non-Hispanic or Non-Latino	Yes	06	2
47FUR058	Unprimed15	Unprimed (B)	7	7 (Day 35)	80059	Na&#195;&#175;ve	Na&#195;&#175;ve	15	Hemagglutinin inhibition - A/Indonesia/05/2005 Antigen	D7POSTVAC2	04APR2011	5	1	0	0	Hemagglutinin inhibition	A/Indonesia/05/2005 Antigen	1.6094379124341	11.5576731837417	104576.4	Female	15	45	Non-Hispanic or Non-Latino	Yes	07	2
47FUR058	Unprimed15	Unprimed (B)	7	7 (Day 35)	80059	Na&#195;&#175;ve	Na&#195;&#175;ve	15	Hemagglutinin inhibition - A/Indonesia/05/2005 Antigen	D7POSTVAC2	04APR2011	5	1	0	0	Hemagglutinin inhibition	A/Indonesia/05/2005 Antigen	1.6094379124341	11.5203631367874	100746.54	Female	15	45	Non-Hispanic or Non-Latino	Yes	07	2
47FUR058	Unprimed15	Unprimed (B)	8	8 (Day 42)	80059	Na&#195;&#175;ve	Na&#195;&#175;ve	15	Hemagglutinin inhibition - A/Indonesia/05/2005 Antigen	D14POSTVAC2	11APR2011	5	1	0	0	Hemagglutinin inhibition	A/Indonesia/05/2005 Antigen	1.6094379124341	10.9277935929848	55703.24	Female	15	45	Non-Hispanic or Non-Latino	Yes	08	2
47FUR058	Unprimed15	Unprimed (B)	8	8 (Day 42)	80059	Na&#195;&#175;ve	Na&#195;&#175;ve	15	Hemagglutinin inhibition - A/Indonesia/05/2005 Antigen	D14POSTVAC2	11APR2011	5	1	0	0	Hemagglutinin inhibition	A/Indonesia/05/2005 Antigen	1.6094379124341	10.1203284840027	24842.93	Female	15	45	Non-Hispanic or Non-Latino	Yes	08	2
47FUR058	Unprimed15	Unprimed (B)	9	9 (Day 56)	80059	Na&#195;&#175;ve	Na&#195;&#175;ve	15	Hemagglutinin inhibition - A/Indonesia/05/2005 Antigen	D28POSTVAC2	25APR2011	5	1	0	0	Hemagglutinin inhibition	A/Indonesia/05/2005 Antigen	1.6094379124341	10.9520957154815	57073.53	Female	15	45	Non-Hispanic or Non-Latino	Yes	09	2
47FUR058	Unprimed15	Unprimed (B)	9	9 (Day 56)	80059	Na&#195;&#175;ve	Na&#195;&#175;ve	15	Hemagglutinin inhibition - A/Indonesia/05/2005 Antigen	D28POSTVAC2	25APR2011	5	1	0	0	Hemagglutinin inhibition	A/Indonesia/05/2005 Antigen	1.6094379124341	10.085979928073	24004.1	Female	15	45	Non-Hispanic or Non-Latino	Yes	09	2
47FUR058	Unprimed15	Unprimed (B)	10	10 (Day 180 or 208)	80059	Na&#195;&#175;ve	Na&#195;&#175;ve	15	Hemagglutinin inhibition - A/Indonesia/05/2005 Antigen	6MOVAC2	19SEP2011	5	1	0	0	Hemagglutinin inhibition	A/Indonesia/05/2005 Antigen	1.6094379124341	11.1248410831339	67835.51	Female	15	45	Non-Hispanic or Non-Latino	Yes	10	2
47FUR058	Unprimed15	Unprimed (B)	10	10 (Day 180 or 208)	80059	Na&#195;&#175;ve	Na&#195;&#175;ve	15	Hemagglutinin inhibition - A/Indonesia/05/2005 Antigen	6MOVAC2	19SEP2011	5	1	0	0	Hemagglutinin inhibition	A/Indonesia/05/2005 Antigen	1.6094379124341	10.596296175792	39986.46	Female	15	45	Non-Hispanic or Non-Latino	Yes	10	2
47FUR059	Multiple	Multiple (A)	1	1 (Day 0)	80059	Previously Vaccinated	MultipleBoost	15	Hemagglutinin inhibition - A/Indonesia/05/2005 Antigen	PREVAC	28FEB2011	5	.	0	.	Hemagglutinin inhibition	A/Indonesia/05/2005 Antigen	1.6094379124341	12.166946607895	192325.9	Male	15	46	Non-Hispanic or Non-Latino	Yes	01	5
47FUR059	Multiple	Multiple (A)	1	1 (Day 0)	80059	Previously Vaccinated	MultipleBoost	15	Hemagglutinin inhibition - A/Indonesia/05/2005 Antigen	PREVAC	28FEB2011	5	.	0	.	Hemagglutinin inhibition	A/Indonesia/05/2005 Antigen	1.6094379124341	12.0120782858795	164732.51	Male	15	46	Non-Hispanic or Non-Latino	Yes	01	5
47FUR059	Multiple	Multiple (A)	2	2 (Day 3)	80059	Previously Vaccinated	MultipleBoost	15	Hemagglutinin inhibition - A/Indonesia/05/2005 Antigen	DAY3	04MAR2011	5	1	0	0	Hemagglutinin inhibition	A/Indonesia/05/2005 Antigen	1.6094379124341	11.965613541584	157253.36	Male	15	46	Non-Hispanic or Non-Latino	Yes	02	5
47FUR059	Multiple	Multiple (A)	2	2 (Day 3)	80059	Previously Vaccinated	MultipleBoost	15	Hemagglutinin inhibition - A/Indonesia/05/2005 Antigen	DAY3	04MAR2011	5	1	0	0	Hemagglutinin inhibition	A/Indonesia/05/2005 Antigen	1.6094379124341	11.9171454649195	149813.35	Male	15	46	Non-Hispanic or Non-Latino	Yes	02	5
47FUR059	Multiple	Multiple (A)	3	3 (Day 7)	80059	Previously Vaccinated	MultipleBoost	15	Hemagglutinin inhibition - A/Indonesia/05/2005 Antigen	DAY7	08MAR2011	7.071067812	1.414213562	0	0	Hemagglutinin inhibition	A/Indonesia/05/2005 Antigen	1.95601150273309	12.3533158809402	231727.15	Male	15	46	Non-Hispanic or Non-Latino	Yes	03	5
47FUR059	Multiple	Multiple (A)	3	3 (Day 7)	80059	Previously Vaccinated	MultipleBoost	15	Hemagglutinin inhibition - A/Indonesia/05/2005 Antigen	DAY7	08MAR2011	7.071067812	1.414213562	0	0	Hemagglutinin inhibition	A/Indonesia/05/2005 Antigen	1.95601150273309	12.1608469062438	191156.34	Male	15	46	Non-Hispanic or Non-Latino	Yes	03	5
47FUR059	Multiple	Multiple (A)	4	4 (Day 14)	80059	Previously Vaccinated	MultipleBoost	15	Hemagglutinin inhibition - A/Indonesia/05/2005 Antigen	DAY14	15MAR2011	7.071067812	1.414213562	0	0	Hemagglutinin inhibition	A/Indonesia/05/2005 Antigen	1.95601150273309	12.3367201775732	227913.21	Male	15	46	Non-Hispanic or Non-Latino	Yes	04	5
47FUR059	Multiple	Multiple (A)	4	4 (Day 14)	80059	Previously Vaccinated	MultipleBoost	15	Hemagglutinin inhibition - A/Indonesia/05/2005 Antigen	DAY14	15MAR2011	7.071067812	1.414213562	0	0	Hemagglutinin inhibition	A/Indonesia/05/2005 Antigen	1.95601150273309	12.1648946501491	191931.66	Male	15	46	Non-Hispanic or Non-Latino	Yes	04	5
47FUR059	Multiple	Multiple (A)	9	9 (Day 56)	80059	Previously Vaccinated	MultipleBoost	15	Hemagglutinin inhibition - A/Indonesia/05/2005 Antigen	DAY56	26APR2011	5	1	0	0	Hemagglutinin inhibition	A/Indonesia/05/2005 Antigen	1.6094379124341	12.1118274584197	182011.92	Male	15	46	Non-Hispanic or Non-Latino	Yes	09	5
47FUR059	Multiple	Multiple (A)	9	9 (Day 56)	80059	Previously Vaccinated	MultipleBoost	15	Hemagglutinin inhibition - A/Indonesia/05/2005 Antigen	DAY56	26APR2011	5	1	0	0	Hemagglutinin inhibition	A/Indonesia/05/2005 Antigen	1.6094379124341	11.9408767206939	153411.13	Male	15	46	Non-Hispanic or Non-Latino	Yes	09	5
47FUR059	Multiple	Multiple (A)	10	10 (Day 180 or 208)	80059	Previously Vaccinated	MultipleBoost	15	Hemagglutinin inhibition - A/Indonesia/05/2005 Antigen	DAY180	23AUG2011	5	1	0	0	Hemagglutinin inhibition	A/Indonesia/05/2005 Antigen	1.6094379124341	11.9679224938244	157616.87	Male	15	46	Non-Hispanic or Non-Latino	Yes	10	5
47FUR059	Multiple	Multiple (A)	10	10 (Day 180 or 208)	80059	Previously Vaccinated	MultipleBoost	15	Hemagglutinin inhibition - A/Indonesia/05/2005 Antigen	DAY180	23AUG2011	5	1	0	0	Hemagglutinin inhibition	A/Indonesia/05/2005 Antigen	1.6094379124341	11.8648497021503	142180.08	Male	15	46	Non-Hispanic or Non-Latino	Yes	10	5
47FUR064	Unprimed15	Unprimed (B)	1	1 (Day 0)	80059	Na&#195;&#175;ve	Na&#195;&#175;ve	15	Hemagglutinin inhibition - A/Indonesia/05/2005 Antigen	PREVAC	03MAR2011	5	.	0	.	Hemagglutinin inhibition	A/Indonesia/05/2005 Antigen	1.6094379124341	11.4064232978763	89897.31	Female	15	47	Non-Hispanic or Non-Latino	Yes	01	3
47FUR064	Unprimed15	Unprimed (B)	1	1 (Day 0)	80059	Na&#195;&#175;ve	Na&#195;&#175;ve	15	Hemagglutinin inhibition - A/Indonesia/05/2005 Antigen	PREVAC	03MAR2011	5	.	0	.	Hemagglutinin inhibition	A/Indonesia/05/2005 Antigen	1.6094379124341	11.2526916195476	77087.13	Female	15	47	Non-Hispanic or Non-Latino	Yes	01	3
47FUR064	Unprimed15	Unprimed (B)	2	2 (Day 3)	80059	Na&#195;&#175;ve	Na&#195;&#175;ve	15	Hemagglutinin inhibition - A/Indonesia/05/2005 Antigen	D3POSTVAC1	07MAR2011	5	1	0	0	Hemagglutinin inhibition	A/Indonesia/05/2005 Antigen	1.6094379124341	11.1360271137912	68598.58	Female	15	47	Non-Hispanic or Non-Latino	Yes	02	3
47FUR064	Unprimed15	Unprimed (B)	2	2 (Day 3)	80059	Na&#195;&#175;ve	Na&#195;&#175;ve	15	Hemagglutinin inhibition - A/Indonesia/05/2005 Antigen	D3POSTVAC1	07MAR2011	5	1	0	0	Hemagglutinin inhibition	A/Indonesia/05/2005 Antigen	1.6094379124341	11.5467224578464	103437.46	Female	15	47	Non-Hispanic or Non-Latino	Yes	02	3
47FUR064	Unprimed15	Unprimed (B)	3	3 (Day 7)	80059	Na&#195;&#175;ve	Na&#195;&#175;ve	15	Hemagglutinin inhibition - A/Indonesia/05/2005 Antigen	D7POSTVAC1	11MAR2011	5	1	0	0	Hemagglutinin inhibition	A/Indonesia/05/2005 Antigen	1.6094379124341	11.7392603186577	125399.55	Female	15	47	Non-Hispanic or Non-Latino	Yes	03	3
47FUR064	Unprimed15	Unprimed (B)	3	3 (Day 7)	80059	Na&#195;&#175;ve	Na&#195;&#175;ve	15	Hemagglutinin inhibition - A/Indonesia/05/2005 Antigen	D7POSTVAC1	11MAR2011	5	1	0	0	Hemagglutinin inhibition	A/Indonesia/05/2005 Antigen	1.6094379124341	11.3288854324423	83190.25	Female	15	47	Non-Hispanic or Non-Latino	Yes	03	3
47FUR064	Unprimed15	Unprimed (B)	4	4 (Day 14)	80059	Na&#195;&#175;ve	Na&#195;&#175;ve	15	Hemagglutinin inhibition - A/Indonesia/05/2005 Antigen	D14POSTVAC1	16MAR2011	5	1	0	0	Hemagglutinin inhibition	A/Indonesia/05/2005 Antigen	1.6094379124341	11.7883313170336	131706.51	Female	15	47	Non-Hispanic or Non-Latino	Yes	04	3
47FUR064	Unprimed15	Unprimed (B)	4	4 (Day 14)	80059	Na&#195;&#175;ve	Na&#195;&#175;ve	15	Hemagglutinin inhibition - A/Indonesia/05/2005 Antigen	D14POSTVAC1	16MAR2011	5	1	0	0	Hemagglutinin inhibition	A/Indonesia/05/2005 Antigen	1.6094379124341	11.2633668372261	77914.46	Female	15	47	Non-Hispanic or Non-Latino	Yes	04	3
47FUR064	Unprimed15	Unprimed (B)	5	5 (Day 28)	80059	Na&#195;&#175;ve	Na&#195;&#175;ve	15	Hemagglutinin inhibition - A/Indonesia/05/2005 Antigen	D28POSTVAC1	29MAR2011	5	1	0	0	Hemagglutinin inhibition	A/Indonesia/05/2005 Antigen	1.6094379124341	11.4721416988859	96003.67	Female	15	47	Non-Hispanic or Non-Latino	Yes	05	3
47FUR064	Unprimed15	Unprimed (B)	5	5 (Day 28)	80059	Na&#195;&#175;ve	Na&#195;&#175;ve	15	Hemagglutinin inhibition - A/Indonesia/05/2005 Antigen	D28POSTVAC1	29MAR2011	5	1	0	0	Hemagglutinin inhibition	A/Indonesia/05/2005 Antigen	1.6094379124341	11.0544087280364	63222.07	Female	15	47	Non-Hispanic or Non-Latino	Yes	05	3
47FUR064	Unprimed15	Unprimed (B)	6	6 (Day 31)	80059	Na&#195;&#175;ve	Na&#195;&#175;ve	15	Hemagglutinin inhibition - A/Indonesia/05/2005 Antigen	D3POSTVAC2	01APR2011	5	1	0	0	Hemagglutinin inhibition	A/Indonesia/05/2005 Antigen	1.6094379124341	11.7713088933363	129483.52	Female	15	47	Non-Hispanic or Non-Latino	Yes	06	3
47FUR064	Unprimed15	Unprimed (B)	6	6 (Day 31)	80059	Na&#195;&#175;ve	Na&#195;&#175;ve	15	Hemagglutinin inhibition - A/Indonesia/05/2005 Antigen	D3POSTVAC2	01APR2011	5	1	0	0	Hemagglutinin inhibition	A/Indonesia/05/2005 Antigen	1.6094379124341	11.3048628721821	81215.62	Female	15	47	Non-Hispanic or Non-Latino	Yes	06	3
47FUR064	Unprimed15	Unprimed (B)	7	7 (Day 35)	80059	Na&#195;&#175;ve	Na&#195;&#175;ve	15	Hemagglutinin inhibition - A/Indonesia/05/2005 Antigen	D7POSTVAC2	04APR2011	5	1	0	0	Hemagglutinin inhibition	A/Indonesia/05/2005 Antigen	1.6094379124341	11.7775870117398	130298.99	Female	15	47	Non-Hispanic or Non-Latino	Yes	07	3
47FUR064	Unprimed15	Unprimed (B)	7	7 (Day 35)	80059	Na&#195;&#175;ve	Na&#195;&#175;ve	15	Hemagglutinin inhibition - A/Indonesia/05/2005 Antigen	D7POSTVAC2	04APR2011	5	1	0	0	Hemagglutinin inhibition	A/Indonesia/05/2005 Antigen	1.6094379124341	11.3637755935643	86144	Female	15	47	Non-Hispanic or Non-Latino	Yes	07	3
47FUR064	Unprimed15	Unprimed (B)	8	8 (Day 42)	80059	Na&#195;&#175;ve	Na&#195;&#175;ve	15	Hemagglutinin inhibition - A/Indonesia/05/2005 Antigen	D14POSTVAC2	11APR2011	5	1	0	0	Hemagglutinin inhibition	A/Indonesia/05/2005 Antigen	1.6094379124341	12.02593566082	167031.16	Female	15	47	Non-Hispanic or Non-Latino	Yes	08	3
47FUR064	Unprimed15	Unprimed (B)	8	8 (Day 42)	80059	Na&#195;&#175;ve	Na&#195;&#175;ve	15	Hemagglutinin inhibition - A/Indonesia/05/2005 Antigen	D14POSTVAC2	11APR2011	5	1	0	0	Hemagglutinin inhibition	A/Indonesia/05/2005 Antigen	1.6094379124341	11.4880610926299	97544.22	Female	15	47	Non-Hispanic or Non-Latino	Yes	08	3
47FUR064	Unprimed15	Unprimed (B)	9	9 (Day 56)	80059	Na&#195;&#175;ve	Na&#195;&#175;ve	15	Hemagglutinin inhibition - A/Indonesia/05/2005 Antigen	D28POSTVAC2	28APR2011	5	1	0	0	Hemagglutinin inhibition	A/Indonesia/05/2005 Antigen	1.6094379124341	11.8138368429926	135108.96	Female	15	47	Non-Hispanic or Non-Latino	Yes	09	3
47FUR064	Unprimed15	Unprimed (B)	9	9 (Day 56)	80059	Na&#195;&#175;ve	Na&#195;&#175;ve	15	Hemagglutinin inhibition - A/Indonesia/05/2005 Antigen	D28POSTVAC2	28APR2011	5	1	0	0	Hemagglutinin inhibition	A/Indonesia/05/2005 Antigen	1.6094379124341	11.6207312485221	111383.14	Female	15	47	Non-Hispanic or Non-Latino	Yes	09	3
47FUR064	Unprimed15	Unprimed (B)	10	10 (Day 180 or 208)	80059	Na&#195;&#175;ve	Na&#195;&#175;ve	15	Hemagglutinin inhibition - A/Indonesia/05/2005 Antigen	6MOVAC2	22SEP2011	5	1	0	0	Hemagglutinin inhibition	A/Indonesia/05/2005 Antigen	1.6094379124341	11.8143835854325	135182.85	Female	15	47	Non-Hispanic or Non-Latino	Yes	10	3
47FUR064	Unprimed15	Unprimed (B)	10	10 (Day 180 or 208)	80059	Na&#195;&#175;ve	Na&#195;&#175;ve	15	Hemagglutinin inhibition - A/Indonesia/05/2005 Antigen	6MOVAC2	22SEP2011	5	1	0	0	Hemagglutinin inhibition	A/Indonesia/05/2005 Antigen	1.6094379124341	11.4438455539811	93325.21	Female	15	47	Non-Hispanic or Non-Latino	Yes	10	3
47FUR067	Unprimed15	Unprimed (B)	1	1 (Day 0)	80059	Na&#195;&#175;ve	Na&#195;&#175;ve	15	Hemagglutinin inhibition - A/Indonesia/05/2005 Antigen	PREVAC	10MAR2011	5	.	0	.	Hemagglutinin inhibition	A/Indonesia/05/2005 Antigen	1.6094379124341	10.6935976373077	44072.78	Female	15	48	Non-Hispanic or Non-Latino	Yes	01	4
47FUR067	Unprimed15	Unprimed (B)	1	1 (Day 0)	80059	Na&#195;&#175;ve	Na&#195;&#175;ve	15	Hemagglutinin inhibition - A/Indonesia/05/2005 Antigen	PREVAC	10MAR2011	5	.	0	.	Hemagglutinin inhibition	A/Indonesia/05/2005 Antigen	1.6094379124341	9.90590462905173	20048.4	Female	15	48	Non-Hispanic or Non-Latino	Yes	01	4
47FUR067	Unprimed15	Unprimed (B)	2	2 (Day 3)	80059	Na&#195;&#175;ve	Na&#195;&#175;ve	15	Hemagglutinin inhibition - A/Indonesia/05/2005 Antigen	D3POSTVAC1	14MAR2011	5	1	0	0	Hemagglutinin inhibition	A/Indonesia/05/2005 Antigen	1.6094379124341	10.7988706348017	48965.47	Female	15	48	Non-Hispanic or Non-Latino	Yes	02	4
47FUR067	Unprimed15	Unprimed (B)	2	2 (Day 3)	80059	Na&#195;&#175;ve	Na&#195;&#175;ve	15	Hemagglutinin inhibition - A/Indonesia/05/2005 Antigen	D3POSTVAC1	14MAR2011	5	1	0	0	Hemagglutinin inhibition	A/Indonesia/05/2005 Antigen	1.6094379124341	10.3803792792757	32221.18	Female	15	48	Non-Hispanic or Non-Latino	Yes	02	4
47FUR067	Unprimed15	Unprimed (B)	3	3 (Day 7)	80059	Na&#195;&#175;ve	Na&#195;&#175;ve	15	Hemagglutinin inhibition - A/Indonesia/05/2005 Antigen	D7POSTVAC1	18MAR2011	5	1	0	0	Hemagglutinin inhibition	A/Indonesia/05/2005 Antigen	1.6094379124341	10.9642221191678	57769.84	Female	15	48	Non-Hispanic or Non-Latino	Yes	03	4
47FUR067	Unprimed15	Unprimed (B)	3	3 (Day 7)	80059	Na&#195;&#175;ve	Na&#195;&#175;ve	15	Hemagglutinin inhibition - A/Indonesia/05/2005 Antigen	D7POSTVAC1	18MAR2011	5	1	0	0	Hemagglutinin inhibition	A/Indonesia/05/2005 Antigen	1.6094379124341	10.3620000989547	31634.39	Female	15	48	Non-Hispanic or Non-Latino	Yes	03	4
47FUR067	Unprimed15	Unprimed (B)	4	4 (Day 14)	80059	Na&#195;&#175;ve	Na&#195;&#175;ve	15	Hemagglutinin inhibition - A/Indonesia/05/2005 Antigen	D14POSTVAC1	25MAR2011	5	1	0	0	Hemagglutinin inhibition	A/Indonesia/05/2005 Antigen	1.6094379124341	11.186776262017	72169.75	Female	15	48	Non-Hispanic or Non-Latino	Yes	04	4
47FUR067	Unprimed15	Unprimed (B)	4	4 (Day 14)	80059	Na&#195;&#175;ve	Na&#195;&#175;ve	15	Hemagglutinin inhibition - A/Indonesia/05/2005 Antigen	D14POSTVAC1	25MAR2011	5	1	0	0	Hemagglutinin inhibition	A/Indonesia/05/2005 Antigen	1.6094379124341	10.9077027111098	54595.28	Female	15	48	Non-Hispanic or Non-Latino	Yes	04	4
47FUR067	Unprimed15	Unprimed (B)	5	5 (Day 28)	80059	Na&#195;&#175;ve	Na&#195;&#175;ve	15	Hemagglutinin inhibition - A/Indonesia/05/2005 Antigen	D28POSTVAC1	06APR2011	5	1	0	0	Hemagglutinin inhibition	A/Indonesia/05/2005 Antigen	1.6094379124341	11.0126346546795	60635.43	Female	15	48	Non-Hispanic or Non-Latino	Yes	05	4
47FUR067	Unprimed15	Unprimed (B)	5	5 (Day 28)	80059	Na&#195;&#175;ve	Na&#195;&#175;ve	15	Hemagglutinin inhibition - A/Indonesia/05/2005 Antigen	D28POSTVAC1	06APR2011	5	1	0	0	Hemagglutinin inhibition	A/Indonesia/05/2005 Antigen	1.6094379124341	10.6021880349325	40222.75	Female	15	48	Non-Hispanic or Non-Latino	Yes	05	4
47FUR067	Unprimed15	Unprimed (B)	6	6 (Day 31)	80059	Na&#195;&#175;ve	Na&#195;&#175;ve	15	Hemagglutinin inhibition - A/Indonesia/05/2005 Antigen	D3POSTVAC2	08APR2011	5	1	0	0	Hemagglutinin inhibition	A/Indonesia/05/2005 Antigen	1.6094379124341	10.9822516628706	58820.85	Female	15	48	Non-Hispanic or Non-Latino	Yes	06	4
47FUR067	Unprimed15	Unprimed (B)	6	6 (Day 31)	80059	Na&#195;&#175;ve	Na&#195;&#175;ve	15	Hemagglutinin inhibition - A/Indonesia/05/2005 Antigen	D3POSTVAC2	08APR2011	5	1	0	0	Hemagglutinin inhibition	A/Indonesia/05/2005 Antigen	1.6094379124341	10.2227093522508	27521.13	Female	15	48	Non-Hispanic or Non-Latino	Yes	06	4
47FUR067	Unprimed15	Unprimed (B)	7	7 (Day 35)	80059	Na&#195;&#175;ve	Na&#195;&#175;ve	15	Hemagglutinin inhibition - A/Indonesia/05/2005 Antigen	D7POSTVAC2	14APR2011	5	1	0	0	Hemagglutinin inhibition	A/Indonesia/05/2005 Antigen	1.6094379124341	11.4338438369782	92396.45	Female	15	48	Non-Hispanic or Non-Latino	Yes	07	4
47FUR067	Unprimed15	Unprimed (B)	7	7 (Day 35)	80059	Na&#195;&#175;ve	Na&#195;&#175;ve	15	Hemagglutinin inhibition - A/Indonesia/05/2005 Antigen	D7POSTVAC2	14APR2011	5	1	0	0	Hemagglutinin inhibition	A/Indonesia/05/2005 Antigen	1.6094379124341	11.0916108138224	65618.36	Female	15	48	Non-Hispanic or Non-Latino	Yes	07	4
47FUR067	Unprimed15	Unprimed (B)	8	8 (Day 42)	80059	Na&#195;&#175;ve	Na&#195;&#175;ve	15	Hemagglutinin inhibition - A/Indonesia/05/2005 Antigen	D14POSTVAC2	21APR2011	7.071067812	1.414213562	0	0	Hemagglutinin inhibition	A/Indonesia/05/2005 Antigen	1.95601150273309	11.7269463308383	123864.85	Female	15	48	Non-Hispanic or Non-Latino	Yes	08	4
47FUR067	Unprimed15	Unprimed (B)	8	8 (Day 42)	80059	Na&#195;&#175;ve	Na&#195;&#175;ve	15	Hemagglutinin inhibition - A/Indonesia/05/2005 Antigen	D14POSTVAC2	21APR2011	7.071067812	1.414213562	0	0	Hemagglutinin inhibition	A/Indonesia/05/2005 Antigen	1.95601150273309	11.129136522107	68127.52	Female	15	48	Non-Hispanic or Non-Latino	Yes	08	4
47FUR067	Unprimed15	Unprimed (B)	9	9 (Day 56)	80059	Na&#195;&#175;ve	Na&#195;&#175;ve	15	Hemagglutinin inhibition - A/Indonesia/05/2005 Antigen	D28POSTVAC2	05MAY2011	7.071067812	1.414213562	0	0	Hemagglutinin inhibition	A/Indonesia/05/2005 Antigen	1.95601150273309	11.6991599396395	120470.47	Female	15	48	Non-Hispanic or Non-Latino	Yes	09	4
47FUR067	Unprimed15	Unprimed (B)	9	9 (Day 56)	80059	Na&#195;&#175;ve	Na&#195;&#175;ve	15	Hemagglutinin inhibition - A/Indonesia/05/2005 Antigen	D28POSTVAC2	05MAY2011	7.071067812	1.414213562	0	0	Hemagglutinin inhibition	A/Indonesia/05/2005 Antigen	1.95601150273309	11.3580036045262	85648.21	Female	15	48	Non-Hispanic or Non-Latino	Yes	09	4
47FUR067	Unprimed15	Unprimed (B)	10	10 (Day 180 or 208)	80059	Na&#195;&#175;ve	Na&#195;&#175;ve	15	Hemagglutinin inhibition - A/Indonesia/05/2005 Antigen	6MOVAC2	29SEP2011	5	1	0	0	Hemagglutinin inhibition	A/Indonesia/05/2005 Antigen	1.6094379124341	11.2318839617192	75499.7	Female	15	48	Non-Hispanic or Non-Latino	Yes	10	4
47FUR067	Unprimed15	Unprimed (B)	10	10 (Day 180 or 208)	80059	Na&#195;&#175;ve	Na&#195;&#175;ve	15	Hemagglutinin inhibition - A/Indonesia/05/2005 Antigen	6MOVAC2	29SEP2011	5	1	0	0	Hemagglutinin inhibition	A/Indonesia/05/2005 Antigen	1.6094379124341	10.8492242647536	51494.19	Female	15	48	Non-Hispanic or Non-Latino	Yes	10	4
47FUR068	Unprimed15	Unprimed (B)	1	1 (Day 0)	80059	Na&#195;&#175;ve	Na&#195;&#175;ve	15	Hemagglutinin inhibition - A/Indonesia/05/2005 Antigen	PREVAC	10MAR2011	5	.	0	.	Hemagglutinin inhibition	A/Indonesia/05/2005 Antigen	1.6094379124341	11.8236212536493	136437.41	Female	15	45	Non-Hispanic or Non-Latino	Yes	01	5
47FUR068	Unprimed15	Unprimed (B)	1	1 (Day 0)	80059	Na&#195;&#175;ve	Na&#195;&#175;ve	15	Hemagglutinin inhibition - A/Indonesia/05/2005 Antigen	PREVAC	10MAR2011	5	.	0	.	Hemagglutinin inhibition	A/Indonesia/05/2005 Antigen	1.6094379124341	11.7785372965323	130422.87	Female	15	45	Non-Hispanic or Non-Latino	Yes	01	5
47FUR068	Unprimed15	Unprimed (B)	2	2 (Day 3)	80059	Na&#195;&#175;ve	Na&#195;&#175;ve	15	Hemagglutinin inhibition - A/Indonesia/05/2005 Antigen	D3POSTVAC1	14MAR2011	5	1	0	0	Hemagglutinin inhibition	A/Indonesia/05/2005 Antigen	1.6094379124341	11.7661680997322	128819.58	Female	15	45	Non-Hispanic or Non-Latino	Yes	02	5
47FUR068	Unprimed15	Unprimed (B)	2	2 (Day 3)	80059	Na&#195;&#175;ve	Na&#195;&#175;ve	15	Hemagglutinin inhibition - A/Indonesia/05/2005 Antigen	D3POSTVAC1	14MAR2011	5	1	0	0	Hemagglutinin inhibition	A/Indonesia/05/2005 Antigen	1.6094379124341	11.6984093496637	120380.08	Female	15	45	Non-Hispanic or Non-Latino	Yes	02	5
47FUR068	Unprimed15	Unprimed (B)	3	3 (Day 7)	80059	Na&#195;&#175;ve	Na&#195;&#175;ve	15	Hemagglutinin inhibition - A/Indonesia/05/2005 Antigen	D7POSTVAC1	16MAR2011	5	1	0	0	Hemagglutinin inhibition	A/Indonesia/05/2005 Antigen	1.6094379124341	12.0984920562204	179600.83	Female	15	45	Non-Hispanic or Non-Latino	Yes	03	5
47FUR068	Unprimed15	Unprimed (B)	3	3 (Day 7)	80059	Na&#195;&#175;ve	Na&#195;&#175;ve	15	Hemagglutinin inhibition - A/Indonesia/05/2005 Antigen	D7POSTVAC1	16MAR2011	5	1	0	0	Hemagglutinin inhibition	A/Indonesia/05/2005 Antigen	1.6094379124341	11.836029602531	138140.92	Female	15	45	Non-Hispanic or Non-Latino	Yes	03	5
47FUR068	Unprimed15	Unprimed (B)	4	4 (Day 14)	80059	Na&#195;&#175;ve	Na&#195;&#175;ve	15	Hemagglutinin inhibition - A/Indonesia/05/2005 Antigen	D14POSTVAC1	23MAR2011	5	1	0	0	Hemagglutinin inhibition	A/Indonesia/05/2005 Antigen	1.6094379124341	12.0156190935083	165316.83	Female	15	45	Non-Hispanic or Non-Latino	Yes	04	5
47FUR068	Unprimed15	Unprimed (B)	4	4 (Day 14)	80059	Na&#195;&#175;ve	Na&#195;&#175;ve	15	Hemagglutinin inhibition - A/Indonesia/05/2005 Antigen	D14POSTVAC1	23MAR2011	5	1	0	0	Hemagglutinin inhibition	A/Indonesia/05/2005 Antigen	1.6094379124341	11.8447747464678	139354.28	Female	15	45	Non-Hispanic or Non-Latino	Yes	04	5
47FUR068	Unprimed15	Unprimed (B)	6	6 (Day 31)	80059	Na&#195;&#175;ve	Na&#195;&#175;ve	15	Hemagglutinin inhibition - A/Indonesia/05/2005 Antigen	D3POSTVAC2	08APR2011	5	1	0	0	Hemagglutinin inhibition	A/Indonesia/05/2005 Antigen	1.6094379124341	11.9386189267337	153065.15	Female	15	45	Non-Hispanic or Non-Latino	Yes	06	5
47FUR068	Unprimed15	Unprimed (B)	6	6 (Day 31)	80059	Na&#195;&#175;ve	Na&#195;&#175;ve	15	Hemagglutinin inhibition - A/Indonesia/05/2005 Antigen	D3POSTVAC2	08APR2011	5	1	0	0	Hemagglutinin inhibition	A/Indonesia/05/2005 Antigen	1.6094379124341	11.9304081386659	151813.51	Female	15	45	Non-Hispanic or Non-Latino	Yes	06	5
47FUR068	Unprimed15	Unprimed (B)	7	7 (Day 35)	80059	Na&#195;&#175;ve	Na&#195;&#175;ve	15	Hemagglutinin inhibition - A/Indonesia/05/2005 Antigen	D7POSTVAC2	12APR2011	5	1	0	0	Hemagglutinin inhibition	A/Indonesia/05/2005 Antigen	1.6094379124341	11.843079929287	139118.3	Female	15	45	Non-Hispanic or Non-Latino	Yes	07	5
47FUR068	Unprimed15	Unprimed (B)	7	7 (Day 35)	80059	Na&#195;&#175;ve	Na&#195;&#175;ve	15	Hemagglutinin inhibition - A/Indonesia/05/2005 Antigen	D7POSTVAC2	12APR2011	5	1	0	0	Hemagglutinin inhibition	A/Indonesia/05/2005 Antigen	1.6094379124341	11.647319023323	114384.29	Female	15	45	Non-Hispanic or Non-Latino	Yes	07	5
47FUR068	Unprimed15	Unprimed (B)	8	8 (Day 42)	80059	Na&#195;&#175;ve	Na&#195;&#175;ve	15	Hemagglutinin inhibition - A/Indonesia/05/2005 Antigen	D14POSTVAC2	19APR2011	5	1	0	0	Hemagglutinin inhibition	A/Indonesia/05/2005 Antigen	1.6094379124341	14.1519827945854	1400000	Female	15	45	Non-Hispanic or Non-Latino	Yes	08	5
47FUR068	Unprimed15	Unprimed (B)	8	8 (Day 42)	80059	Na&#195;&#175;ve	Na&#195;&#175;ve	15	Hemagglutinin inhibition - A/Indonesia/05/2005 Antigen	D14POSTVAC2	19APR2011	5	1	0	0	Hemagglutinin inhibition	A/Indonesia/05/2005 Antigen	1.6094379124341	13.883169206438	1070000	Female	15	45	Non-Hispanic or Non-Latino	Yes	08	5
47FUR068	Unprimed15	Unprimed (B)	9	9 (Day 56)	80059	Na&#195;&#175;ve	Na&#195;&#175;ve	15	Hemagglutinin inhibition - A/Indonesia/05/2005 Antigen	D28POSTVAC2	03MAY2011	5	1	0	0	Hemagglutinin inhibition	A/Indonesia/05/2005 Antigen	1.6094379124341	12.0633676466095	173401.96	Female	15	45	Non-Hispanic or Non-Latino	Yes	09	5
47FUR068	Unprimed15	Unprimed (B)	9	9 (Day 56)	80059	Na&#195;&#175;ve	Na&#195;&#175;ve	15	Hemagglutinin inhibition - A/Indonesia/05/2005 Antigen	D28POSTVAC2	03MAY2011	5	1	0	0	Hemagglutinin inhibition	A/Indonesia/05/2005 Antigen	1.6094379124341	12.0253987905297	166941.51	Female	15	45	Non-Hispanic or Non-Latino	Yes	09	5
47FUR068	Unprimed15	Unprimed (B)	10	10 (Day 180 or 208)	80059	Na&#195;&#175;ve	Na&#195;&#175;ve	15	Hemagglutinin inhibition - A/Indonesia/05/2005 Antigen	6MOVAC2	10OCT2011	5	1	0	0	Hemagglutinin inhibition	A/Indonesia/05/2005 Antigen	1.6094379124341	11.9162933086894	149685.74	Female	15	45	Non-Hispanic or Non-Latino	Yes	10	5
47FUR068	Unprimed15	Unprimed (B)	10	10 (Day 180 or 208)	80059	Na&#195;&#175;ve	Na&#195;&#175;ve	15	Hemagglutinin inhibition - A/Indonesia/05/2005 Antigen	6MOVAC2	10OCT2011	5	1	0	0	Hemagglutinin inhibition	A/Indonesia/05/2005 Antigen	1.6094379124341	11.5516316226856	103946.5	Female	15	45	Non-Hispanic or Non-Latino	Yes	10	5
47FUR073	Unprimed15	Unprimed (B)	1	1 (Day 0)	80059	Na&#195;&#175;ve	Na&#195;&#175;ve	15	Hemagglutinin inhibition - A/Indonesia/05/2005 Antigen	PREVAC	22MAR2011	5	.	0	.	Hemagglutinin inhibition	A/Indonesia/05/2005 Antigen	1.6094379124341	9.98585570810475	21717.11	Female	15	40	Non-Hispanic or Non-Latino	No	01	1
47FUR073	Unprimed15	Unprimed (B)	1	1 (Day 0)	80059	Na&#195;&#175;ve	Na&#195;&#175;ve	15	Hemagglutinin inhibition - A/Indonesia/05/2005 Antigen	PREVAC	22MAR2011	5	.	0	.	Hemagglutinin inhibition	A/Indonesia/05/2005 Antigen	1.6094379124341	9.69404471632663	16220.72	Female	15	40	Non-Hispanic or Non-Latino	No	01	1
47FUR073	Unprimed15	Unprimed (B)	2	2 (Day 3)	80059	Na&#195;&#175;ve	Na&#195;&#175;ve	15	Hemagglutinin inhibition - A/Indonesia/05/2005 Antigen	D3POSTVAC1	24MAR2011	5	1	0	0	Hemagglutinin inhibition	A/Indonesia/05/2005 Antigen	1.6094379124341	9.72880494453744	16794.47	Female	15	40	Non-Hispanic or Non-Latino	No	02	1
47FUR073	Unprimed15	Unprimed (B)	2	2 (Day 3)	80059	Na&#195;&#175;ve	Na&#195;&#175;ve	15	Hemagglutinin inhibition - A/Indonesia/05/2005 Antigen	D3POSTVAC1	24MAR2011	5	1	0	0	Hemagglutinin inhibition	A/Indonesia/05/2005 Antigen	1.6094379124341	.	.	Female	15	40	Non-Hispanic or Non-Latino	No	02	1
47FUR073	Unprimed15	Unprimed (B)	3	3 (Day 7)	80059	Na&#195;&#175;ve	Na&#195;&#175;ve	15	Hemagglutinin inhibition - A/Indonesia/05/2005 Antigen	D7POSTVAC1	29MAR2011	5	1	0	0	Hemagglutinin inhibition	A/Indonesia/05/2005 Antigen	1.6094379124341	10.901767772799	54272.22	Female	15	40	Non-Hispanic or Non-Latino	No	03	1
47FUR073	Unprimed15	Unprimed (B)	3	3 (Day 7)	80059	Na&#195;&#175;ve	Na&#195;&#175;ve	15	Hemagglutinin inhibition - A/Indonesia/05/2005 Antigen	D7POSTVAC1	29MAR2011	5	1	0	0	Hemagglutinin inhibition	A/Indonesia/05/2005 Antigen	1.6094379124341	10.7198120821364	45243.4	Female	15	40	Non-Hispanic or Non-Latino	No	03	1
47FUR073	Unprimed15	Unprimed (B)	4	4 (Day 14)	80059	Na&#195;&#175;ve	Na&#195;&#175;ve	15	Hemagglutinin inhibition - A/Indonesia/05/2005 Antigen	D14POSTVAC1	05APR2011	5	1	0	0	Hemagglutinin inhibition	A/Indonesia/05/2005 Antigen	1.6094379124341	12.1405549251334	187316.49	Female	15	40	Non-Hispanic or Non-Latino	No	04	1
47FUR073	Unprimed15	Unprimed (B)	4	4 (Day 14)	80059	Na&#195;&#175;ve	Na&#195;&#175;ve	15	Hemagglutinin inhibition - A/Indonesia/05/2005 Antigen	D14POSTVAC1	05APR2011	5	1	0	0	Hemagglutinin inhibition	A/Indonesia/05/2005 Antigen	1.6094379124341	11.8803560787559	144401.96	Female	15	40	Non-Hispanic or Non-Latino	No	04	1
47FUR073	Unprimed15	Unprimed (B)	5	5 (Day 28)	80059	Na&#195;&#175;ve	Na&#195;&#175;ve	15	Hemagglutinin inhibition - A/Indonesia/05/2005 Antigen	D28POSTVAC1	19APR2011	5	1	0	0	Hemagglutinin inhibition	A/Indonesia/05/2005 Antigen	1.6094379124341	11.7043495510909	121097.29	Female	15	40	Non-Hispanic or Non-Latino	No	05	1
47FUR073	Unprimed15	Unprimed (B)	5	5 (Day 28)	80059	Na&#195;&#175;ve	Na&#195;&#175;ve	15	Hemagglutinin inhibition - A/Indonesia/05/2005 Antigen	D28POSTVAC1	19APR2011	5	1	0	0	Hemagglutinin inhibition	A/Indonesia/05/2005 Antigen	1.6094379124341	11.5591797498472	104734.07	Female	15	40	Non-Hispanic or Non-Latino	No	05	1
47FUR073	Unprimed15	Unprimed (B)	6	6 (Day 31)	80059	Na&#195;&#175;ve	Na&#195;&#175;ve	15	Hemagglutinin inhibition - A/Indonesia/05/2005 Antigen	D3POSTVAC2	21APR2011	5	1	0	0	Hemagglutinin inhibition	A/Indonesia/05/2005 Antigen	1.6094379124341	11.8776326042862	144009.22	Female	15	40	Non-Hispanic or Non-Latino	No	06	1
47FUR073	Unprimed15	Unprimed (B)	6	6 (Day 31)	80059	Na&#195;&#175;ve	Na&#195;&#175;ve	15	Hemagglutinin inhibition - A/Indonesia/05/2005 Antigen	D3POSTVAC2	21APR2011	5	1	0	0	Hemagglutinin inhibition	A/Indonesia/05/2005 Antigen	1.6094379124341	11.7069277852479	121409.91	Female	15	40	Non-Hispanic or Non-Latino	No	06	1
47FUR073	Unprimed15	Unprimed (B)	7	7 (Day 35)	80059	Na&#195;&#175;ve	Na&#195;&#175;ve	15	Hemagglutinin inhibition - A/Indonesia/05/2005 Antigen	D7POSTVAC2	26APR2011	5	1	0	0	Hemagglutinin inhibition	A/Indonesia/05/2005 Antigen	1.6094379124341	12.0409455530244	169557.19	Female	15	40	Non-Hispanic or Non-Latino	No	07	1
47FUR073	Unprimed15	Unprimed (B)	7	7 (Day 35)	80059	Na&#195;&#175;ve	Na&#195;&#175;ve	15	Hemagglutinin inhibition - A/Indonesia/05/2005 Antigen	D7POSTVAC2	26APR2011	5	1	0	0	Hemagglutinin inhibition	A/Indonesia/05/2005 Antigen	1.6094379124341	12.0187262252287	165831.29	Female	15	40	Non-Hispanic or Non-Latino	No	07	1
47FUR073	Unprimed15	Unprimed (B)	8	8 (Day 42)	80059	Na&#195;&#175;ve	Na&#195;&#175;ve	15	Hemagglutinin inhibition - A/Indonesia/05/2005 Antigen	D14POSTVAC2	03MAY2011	5	1	0	0	Hemagglutinin inhibition	A/Indonesia/05/2005 Antigen	1.6094379124341	12.0797092158535	176258.9	Female	15	40	Non-Hispanic or Non-Latino	No	08	1
47FUR073	Unprimed15	Unprimed (B)	8	8 (Day 42)	80059	Na&#195;&#175;ve	Na&#195;&#175;ve	15	Hemagglutinin inhibition - A/Indonesia/05/2005 Antigen	D14POSTVAC2	03MAY2011	5	1	0	0	Hemagglutinin inhibition	A/Indonesia/05/2005 Antigen	1.6094379124341	12.0195970928295	165975.77	Female	15	40	Non-Hispanic or Non-Latino	No	08	1
47FUR073	Unprimed15	Unprimed (B)	9	9 (Day 56)	80059	Na&#195;&#175;ve	Na&#195;&#175;ve	15	Hemagglutinin inhibition - A/Indonesia/05/2005 Antigen	D28POSTVAC2	17MAY2011	5	1	0	0	Hemagglutinin inhibition	A/Indonesia/05/2005 Antigen	1.6094379124341	12.1212057493152	183726.91	Female	15	40	Non-Hispanic or Non-Latino	No	09	1
47FUR073	Unprimed15	Unprimed (B)	9	9 (Day 56)	80059	Na&#195;&#175;ve	Na&#195;&#175;ve	15	Hemagglutinin inhibition - A/Indonesia/05/2005 Antigen	D28POSTVAC2	17MAY2011	5	1	0	0	Hemagglutinin inhibition	A/Indonesia/05/2005 Antigen	1.6094379124341	12.0178545985564	165686.81	Female	15	40	Non-Hispanic or Non-Latino	No	09	1
47FUR073	Unprimed15	Unprimed (B)	10	10 (Day 180 or 208)	80059	Na&#195;&#175;ve	Na&#195;&#175;ve	15	Hemagglutinin inhibition - A/Indonesia/05/2005 Antigen	6MOVAC2	13OCT2011	5	1	0	0	Hemagglutinin inhibition	A/Indonesia/05/2005 Antigen	1.6094379124341	11.5055460035983	99264.77	Female	15	40	Non-Hispanic or Non-Latino	No	10	1
47FUR073	Unprimed15	Unprimed (B)	10	10 (Day 180 or 208)	80059	Na&#195;&#175;ve	Na&#195;&#175;ve	15	Hemagglutinin inhibition - A/Indonesia/05/2005 Antigen	6MOVAC2	13OCT2011	5	1	0	0	Hemagglutinin inhibition	A/Indonesia/05/2005 Antigen	1.6094379124341	11.188473040111	72292.31	Female	15	40	Non-Hispanic or Non-Latino	No	10	1
47FUR080	Unprimed15	Unprimed (B)	1	1 (Day 0)	80059	Na&#195;&#175;ve	Na&#195;&#175;ve	15	Hemagglutinin inhibition - A/Indonesia/05/2005 Antigen	PREVAC	24MAR2011	5	.	0	.	Hemagglutinin inhibition	A/Indonesia/05/2005 Antigen	1.6094379124341	11.3775561558399	87339.33	Female	15	64	Non-Hispanic or Non-Latino	Yes	01	2
47FUR080	Unprimed15	Unprimed (B)	1	1 (Day 0)	80059	Na&#195;&#175;ve	Na&#195;&#175;ve	15	Hemagglutinin inhibition - A/Indonesia/05/2005 Antigen	PREVAC	24MAR2011	5	.	0	.	Hemagglutinin inhibition	A/Indonesia/05/2005 Antigen	1.6094379124341	10.8386879641278	50954.48	Female	15	64	Non-Hispanic or Non-Latino	Yes	01	2
47FUR080	Unprimed15	Unprimed (B)	2	2 (Day 3)	80059	Na&#195;&#175;ve	Na&#195;&#175;ve	15	Hemagglutinin inhibition - A/Indonesia/05/2005 Antigen	D3POSTVAC1	28MAR2011	5	1	0	0	Hemagglutinin inhibition	A/Indonesia/05/2005 Antigen	1.6094379124341	11.3719635629313	86852.24	Female	15	64	Non-Hispanic or Non-Latino	Yes	02	2
47FUR080	Unprimed15	Unprimed (B)	2	2 (Day 3)	80059	Na&#195;&#175;ve	Na&#195;&#175;ve	15	Hemagglutinin inhibition - A/Indonesia/05/2005 Antigen	D3POSTVAC1	28MAR2011	5	1	0	0	Hemagglutinin inhibition	A/Indonesia/05/2005 Antigen	1.6094379124341	10.7206765858744	45282.53	Female	15	64	Non-Hispanic or Non-Latino	Yes	02	2
47FUR080	Unprimed15	Unprimed (B)	3	3 (Day 7)	80059	Na&#195;&#175;ve	Na&#195;&#175;ve	15	Hemagglutinin inhibition - A/Indonesia/05/2005 Antigen	D7POSTVAC1	30MAR2011	5	1	0	0	Hemagglutinin inhibition	A/Indonesia/05/2005 Antigen	1.6094379124341	11.01082053848	60525.53	Female	15	64	Non-Hispanic or Non-Latino	Yes	03	2
47FUR080	Unprimed15	Unprimed (B)	3	3 (Day 7)	80059	Na&#195;&#175;ve	Na&#195;&#175;ve	15	Hemagglutinin inhibition - A/Indonesia/05/2005 Antigen	D7POSTVAC1	30MAR2011	5	1	0	0	Hemagglutinin inhibition	A/Indonesia/05/2005 Antigen	1.6094379124341	.	.	Female	15	64	Non-Hispanic or Non-Latino	Yes	03	2
47FUR080	Unprimed15	Unprimed (B)	4	4 (Day 14)	80059	Na&#195;&#175;ve	Na&#195;&#175;ve	15	Hemagglutinin inhibition - A/Indonesia/05/2005 Antigen	D14POSTVAC1	06APR2011	5	1	0	0	Hemagglutinin inhibition	A/Indonesia/05/2005 Antigen	1.6094379124341	11.5113528290263	99842.86	Female	15	64	Non-Hispanic or Non-Latino	Yes	04	2
47FUR080	Unprimed15	Unprimed (B)	4	4 (Day 14)	80059	Na&#195;&#175;ve	Na&#195;&#175;ve	15	Hemagglutinin inhibition - A/Indonesia/05/2005 Antigen	D14POSTVAC1	06APR2011	5	1	0	0	Hemagglutinin inhibition	A/Indonesia/05/2005 Antigen	1.6094379124341	10.9915603284841	59370.95	Female	15	64	Non-Hispanic or Non-Latino	Yes	04	2
47FUR080	Unprimed15	Unprimed (B)	5	5 (Day 28)	80059	Na&#195;&#175;ve	Na&#195;&#175;ve	15	Hemagglutinin inhibition - A/Indonesia/05/2005 Antigen	D28POSTVAC1	20APR2011	5	1	0	0	Hemagglutinin inhibition	A/Indonesia/05/2005 Antigen	1.6094379124341	11.1352931558535	68548.25	Female	15	64	Non-Hispanic or Non-Latino	Yes	05	2
47FUR080	Unprimed15	Unprimed (B)	5	5 (Day 28)	80059	Na&#195;&#175;ve	Na&#195;&#175;ve	15	Hemagglutinin inhibition - A/Indonesia/05/2005 Antigen	D28POSTVAC1	20APR2011	5	1	0	0	Hemagglutinin inhibition	A/Indonesia/05/2005 Antigen	1.6094379124341	10.3708567772834	31915.81	Female	15	64	Non-Hispanic or Non-Latino	Yes	05	2
47FUR080	Unprimed15	Unprimed (B)	6	6 (Day 31)	80059	Na&#195;&#175;ve	Na&#195;&#175;ve	15	Hemagglutinin inhibition - A/Indonesia/05/2005 Antigen	D3POSTVAC2	22APR2011	5	1	0	0	Hemagglutinin inhibition	A/Indonesia/05/2005 Antigen	1.6094379124341	11.5781604310337	106740.98	Female	15	64	Non-Hispanic or Non-Latino	Yes	06	2
47FUR080	Unprimed15	Unprimed (B)	6	6 (Day 31)	80059	Na&#195;&#175;ve	Na&#195;&#175;ve	15	Hemagglutinin inhibition - A/Indonesia/05/2005 Antigen	D3POSTVAC2	22APR2011	5	1	0	0	Hemagglutinin inhibition	A/Indonesia/05/2005 Antigen	1.6094379124341	10.9379576859477	56272.3	Female	15	64	Non-Hispanic or Non-Latino	Yes	06	2
47FUR080	Unprimed15	Unprimed (B)	7	7 (Day 35)	80059	Na&#195;&#175;ve	Na&#195;&#175;ve	15	Hemagglutinin inhibition - A/Indonesia/05/2005 Antigen	D7POSTVAC2	27APR2011	5	1	0	0	Hemagglutinin inhibition	A/Indonesia/05/2005 Antigen	1.6094379124341	11.7575919668971	127719.53	Female	15	64	Non-Hispanic or Non-Latino	Yes	07	2
47FUR080	Unprimed15	Unprimed (B)	7	7 (Day 35)	80059	Na&#195;&#175;ve	Na&#195;&#175;ve	15	Hemagglutinin inhibition - A/Indonesia/05/2005 Antigen	D7POSTVAC2	27APR2011	5	1	0	0	Hemagglutinin inhibition	A/Indonesia/05/2005 Antigen	1.6094379124341	11.2118419935741	74001.6	Female	15	64	Non-Hispanic or Non-Latino	Yes	07	2
47FUR080	Unprimed15	Unprimed (B)	8	8 (Day 42)	80059	Na&#195;&#175;ve	Na&#195;&#175;ve	15	Hemagglutinin inhibition - A/Indonesia/05/2005 Antigen	D14POSTVAC2	04MAY2011	5	1	0	0	Hemagglutinin inhibition	A/Indonesia/05/2005 Antigen	1.6094379124341	11.6118087083189	110393.74	Female	15	64	Non-Hispanic or Non-Latino	Yes	08	2
47FUR080	Unprimed15	Unprimed (B)	8	8 (Day 42)	80059	Na&#195;&#175;ve	Na&#195;&#175;ve	15	Hemagglutinin inhibition - A/Indonesia/05/2005 Antigen	D14POSTVAC2	04MAY2011	5	1	0	0	Hemagglutinin inhibition	A/Indonesia/05/2005 Antigen	1.6094379124341	11.3077470695213	81450.2	Female	15	64	Non-Hispanic or Non-Latino	Yes	08	2
47FUR080	Unprimed15	Unprimed (B)	9	9 (Day 56)	80059	Na&#195;&#175;ve	Na&#195;&#175;ve	15	Hemagglutinin inhibition - A/Indonesia/05/2005 Antigen	D28POSTVAC2	18MAY2011	5	1	0	0	Hemagglutinin inhibition	A/Indonesia/05/2005 Antigen	1.6094379124341	11.9116670876882	148994.86	Female	15	64	Non-Hispanic or Non-Latino	Yes	09	2
47FUR080	Unprimed15	Unprimed (B)	9	9 (Day 56)	80059	Na&#195;&#175;ve	Na&#195;&#175;ve	15	Hemagglutinin inhibition - A/Indonesia/05/2005 Antigen	D28POSTVAC2	18MAY2011	5	1	0	0	Hemagglutinin inhibition	A/Indonesia/05/2005 Antigen	1.6094379124341	11.7795685621625	130557.44	Female	15	64	Non-Hispanic or Non-Latino	Yes	09	2
47FUR080	Unprimed15	Unprimed (B)	10	10 (Day 180 or 208)	80059	Na&#195;&#175;ve	Na&#195;&#175;ve	15	Hemagglutinin inhibition - A/Indonesia/05/2005 Antigen	6MOVAC2	19OCT2011	5	1	0	0	Hemagglutinin inhibition	A/Indonesia/05/2005 Antigen	1.6094379124341	11.9466248739596	154295.5	Female	15	64	Non-Hispanic or Non-Latino	Yes	10	2
47FUR080	Unprimed15	Unprimed (B)	10	10 (Day 180 or 208)	80059	Na&#195;&#175;ve	Na&#195;&#175;ve	15	Hemagglutinin inhibition - A/Indonesia/05/2005 Antigen	6MOVAC2	19OCT2011	5	1	0	0	Hemagglutinin inhibition	A/Indonesia/05/2005 Antigen	1.6094379124341	11.3427274797905	84349.78	Female	15	64	Non-Hispanic or Non-Latino	Yes	10	2
47FUR084	Unprimed15	Unprimed (B)	1	1 (Day 0)	80059	Na&#195;&#175;ve	Na&#195;&#175;ve	15	Hemagglutinin inhibition - A/Indonesia/05/2005 Antigen	PREVAC	30MAR2011	5	.	0	.	Hemagglutinin inhibition	A/Indonesia/05/2005 Antigen	1.6094379124341	13.0078806696695	445913.68	Male	15	64	Non-Hispanic or Non-Latino	Yes	01	3
47FUR084	Unprimed15	Unprimed (B)	1	1 (Day 0)	80059	Na&#195;&#175;ve	Na&#195;&#175;ve	15	Hemagglutinin inhibition - A/Indonesia/05/2005 Antigen	PREVAC	30MAR2011	5	.	0	.	Hemagglutinin inhibition	A/Indonesia/05/2005 Antigen	1.6094379124341	12.7405666209249	341316.89	Male	15	64	Non-Hispanic or Non-Latino	Yes	01	3
47FUR084	Unprimed15	Unprimed (B)	2	2 (Day 3)	80059	Na&#195;&#175;ve	Na&#195;&#175;ve	15	Hemagglutinin inhibition - A/Indonesia/05/2005 Antigen	D3POSTVAC1	01APR2011	5	1	0	0	Hemagglutinin inhibition	A/Indonesia/05/2005 Antigen	1.6094379124341	12.9939876770425	439761.44	Male	15	64	Non-Hispanic or Non-Latino	Yes	02	3
47FUR084	Unprimed15	Unprimed (B)	2	2 (Day 3)	80059	Na&#195;&#175;ve	Na&#195;&#175;ve	15	Hemagglutinin inhibition - A/Indonesia/05/2005 Antigen	D3POSTVAC1	01APR2011	5	1	0	0	Hemagglutinin inhibition	A/Indonesia/05/2005 Antigen	1.6094379124341	12.6727325971611	318931.81	Male	15	64	Non-Hispanic or Non-Latino	Yes	02	3
47FUR084	Unprimed15	Unprimed (B)	3	3 (Day 7)	80059	Na&#195;&#175;ve	Na&#195;&#175;ve	15	Hemagglutinin inhibition - A/Indonesia/05/2005 Antigen	D7POSTVAC1	05APR2011	5	1	0	0	Hemagglutinin inhibition	A/Indonesia/05/2005 Antigen	1.6094379124341	12.9484642680121	420190.84	Male	15	64	Non-Hispanic or Non-Latino	Yes	03	3
47FUR084	Unprimed15	Unprimed (B)	3	3 (Day 7)	80059	Na&#195;&#175;ve	Na&#195;&#175;ve	15	Hemagglutinin inhibition - A/Indonesia/05/2005 Antigen	D7POSTVAC1	05APR2011	5	1	0	0	Hemagglutinin inhibition	A/Indonesia/05/2005 Antigen	1.6094379124341	12.5850683084154	292163.34	Male	15	64	Non-Hispanic or Non-Latino	Yes	03	3
47FUR084	Unprimed15	Unprimed (B)	4	4 (Day 14)	80059	Na&#195;&#175;ve	Na&#195;&#175;ve	15	Hemagglutinin inhibition - A/Indonesia/05/2005 Antigen	D14POSTVAC1	14APR2011	20	4	0	0	Hemagglutinin inhibition	A/Indonesia/05/2005 Antigen	2.99573227355399	13.2015493674308	541202.81	Male	15	64	Non-Hispanic or Non-Latino	Yes	04	3
47FUR084	Unprimed15	Unprimed (B)	4	4 (Day 14)	80059	Na&#195;&#175;ve	Na&#195;&#175;ve	15	Hemagglutinin inhibition - A/Indonesia/05/2005 Antigen	D14POSTVAC1	14APR2011	20	4	0	0	Hemagglutinin inhibition	A/Indonesia/05/2005 Antigen	2.99573227355399	12.9115263887486	404953.04	Male	15	64	Non-Hispanic or Non-Latino	Yes	04	3
47FUR084	Unprimed15	Unprimed (B)	5	5 (Day 28)	80059	Na&#195;&#175;ve	Na&#195;&#175;ve	15	Hemagglutinin inhibition - A/Indonesia/05/2005 Antigen	D28POSTVAC1	28APR2011	20	4	0	0	Hemagglutinin inhibition	A/Indonesia/05/2005 Antigen	2.99573227355399	13.0793616548353	478954.87	Male	15	64	Non-Hispanic or Non-Latino	Yes	05	3
47FUR084	Unprimed15	Unprimed (B)	5	5 (Day 28)	80059	Na&#195;&#175;ve	Na&#195;&#175;ve	15	Hemagglutinin inhibition - A/Indonesia/05/2005 Antigen	D28POSTVAC1	28APR2011	20	4	0	0	Hemagglutinin inhibition	A/Indonesia/05/2005 Antigen	2.99573227355399	12.789376332441	358389.74	Male	15	64	Non-Hispanic or Non-Latino	Yes	05	3
47FUR084	Unprimed15	Unprimed (B)	6	6 (Day 31)	80059	Na&#195;&#175;ve	Na&#195;&#175;ve	15	Hemagglutinin inhibition - A/Indonesia/05/2005 Antigen	D3POSTVAC2	02MAY2011	25.198421	5.0396842	0	0	Hemagglutinin inhibition	A/Indonesia/05/2005 Antigen	3.22678133382407	12.9364920556431	415190.22	Male	15	64	Non-Hispanic or Non-Latino	Yes	06	3
47FUR084	Unprimed15	Unprimed (B)	6	6 (Day 31)	80059	Na&#195;&#175;ve	Na&#195;&#175;ve	15	Hemagglutinin inhibition - A/Indonesia/05/2005 Antigen	D3POSTVAC2	02MAY2011	25.198421	5.0396842	0	0	Hemagglutinin inhibition	A/Indonesia/05/2005 Antigen	3.22678133382407	12.5945668252956	294951.68	Male	15	64	Non-Hispanic or Non-Latino	Yes	06	3
47FUR084	Unprimed15	Unprimed (B)	7	7 (Day 35)	80059	Na&#195;&#175;ve	Na&#195;&#175;ve	15	Hemagglutinin inhibition - A/Indonesia/05/2005 Antigen	D7POSTVAC2	05MAY2011	20	4	0	0	Hemagglutinin inhibition	A/Indonesia/05/2005 Antigen	2.99573227355399	13.126747552847	502196.9	Male	15	64	Non-Hispanic or Non-Latino	Yes	07	3
47FUR084	Unprimed15	Unprimed (B)	7	7 (Day 35)	80059	Na&#195;&#175;ve	Na&#195;&#175;ve	15	Hemagglutinin inhibition - A/Indonesia/05/2005 Antigen	D7POSTVAC2	05MAY2011	20	4	0	0	Hemagglutinin inhibition	A/Indonesia/05/2005 Antigen	2.99573227355399	12.8532109131533	382013.38	Male	15	64	Non-Hispanic or Non-Latino	Yes	07	3
47FUR084	Unprimed15	Unprimed (B)	8	8 (Day 42)	80059	Na&#195;&#175;ve	Na&#195;&#175;ve	15	Hemagglutinin inhibition - A/Indonesia/05/2005 Antigen	D14POSTVAC2	12MAY2011	20	4	0	0	Hemagglutinin inhibition	A/Indonesia/05/2005 Antigen	2.99573227355399	12.9897805861438	437915.21	Male	15	64	Non-Hispanic or Non-Latino	Yes	08	3
47FUR084	Unprimed15	Unprimed (B)	8	8 (Day 42)	80059	Na&#195;&#175;ve	Na&#195;&#175;ve	15	Hemagglutinin inhibition - A/Indonesia/05/2005 Antigen	D14POSTVAC2	12MAY2011	20	4	0	0	Hemagglutinin inhibition	A/Indonesia/05/2005 Antigen	2.99573227355399	12.8871879322872	395216.08	Male	15	64	Non-Hispanic or Non-Latino	Yes	08	3
47FUR084	Unprimed15	Unprimed (B)	9	9 (Day 56)	80059	Na&#195;&#175;ve	Na&#195;&#175;ve	15	Hemagglutinin inhibition - A/Indonesia/05/2005 Antigen	D28POSTVAC2	26MAY2011	20	4	0	0	Hemagglutinin inhibition	A/Indonesia/05/2005 Antigen	2.99573227355399	12.98178352263	434427.14	Male	15	64	Non-Hispanic or Non-Latino	Yes	09	3
47FUR084	Unprimed15	Unprimed (B)	9	9 (Day 56)	80059	Na&#195;&#175;ve	Na&#195;&#175;ve	15	Hemagglutinin inhibition - A/Indonesia/05/2005 Antigen	D28POSTVAC2	26MAY2011	20	4	0	0	Hemagglutinin inhibition	A/Indonesia/05/2005 Antigen	2.99573227355399	12.8206744385397	369784.04	Male	15	64	Non-Hispanic or Non-Latino	Yes	09	3
47FUR084	Unprimed15	Unprimed (B)	10	10 (Day 180 or 208)	80059	Na&#195;&#175;ve	Na&#195;&#175;ve	15	Hemagglutinin inhibition - A/Indonesia/05/2005 Antigen	6MOVAC2	20OCT2011	7.071067812	1.414213562	0	0	Hemagglutinin inhibition	A/Indonesia/05/2005 Antigen	1.95601150273309	12.8117181107224	366486.92	Male	15	64	Non-Hispanic or Non-Latino	Yes	10	3
47FUR084	Unprimed15	Unprimed (B)	10	10 (Day 180 or 208)	80059	Na&#195;&#175;ve	Na&#195;&#175;ve	15	Hemagglutinin inhibition - A/Indonesia/05/2005 Antigen	6MOVAC2	20OCT2011	7.071067812	1.414213562	0	0	Hemagglutinin inhibition	A/Indonesia/05/2005 Antigen	1.95601150273309	12.5528552259856	282901.83	Male	15	64	Non-Hispanic or Non-Latino	Yes	10	3
47FUR088	Unprimed15	Unprimed (B)	1	1 (Day 0)	80059	Na&#195;&#175;ve	Na&#195;&#175;ve	15	Hemagglutinin inhibition - A/Indonesia/05/2005 Antigen	PREVAC	04APR2011	5	.	0	.	Hemagglutinin inhibition	A/Indonesia/05/2005 Antigen	1.6094379124341	10.0777151917749	23806.53	Female	15	48	Non-Hispanic or Non-Latino	Yes	01	4
47FUR088	Unprimed15	Unprimed (B)	1	1 (Day 0)	80059	Na&#195;&#175;ve	Na&#195;&#175;ve	15	Hemagglutinin inhibition - A/Indonesia/05/2005 Antigen	PREVAC	04APR2011	5	.	0	.	Hemagglutinin inhibition	A/Indonesia/05/2005 Antigen	1.6094379124341	.	.	Female	15	48	Non-Hispanic or Non-Latino	Yes	01	4
47FUR088	Unprimed15	Unprimed (B)	2	2 (Day 3)	80059	Na&#195;&#175;ve	Na&#195;&#175;ve	15	Hemagglutinin inhibition - A/Indonesia/05/2005 Antigen	D3POSTVAC1	07APR2011	5	1	0	0	Hemagglutinin inhibition	A/Indonesia/05/2005 Antigen	1.6094379124341	10.2390844061213	27975.5	Female	15	48	Non-Hispanic or Non-Latino	Yes	02	4
47FUR088	Unprimed15	Unprimed (B)	2	2 (Day 3)	80059	Na&#195;&#175;ve	Na&#195;&#175;ve	15	Hemagglutinin inhibition - A/Indonesia/05/2005 Antigen	D3POSTVAC1	07APR2011	5	1	0	0	Hemagglutinin inhibition	A/Indonesia/05/2005 Antigen	1.6094379124341	.	.	Female	15	48	Non-Hispanic or Non-Latino	Yes	02	4
47FUR088	Unprimed15	Unprimed (B)	3	3 (Day 7)	80059	Na&#195;&#175;ve	Na&#195;&#175;ve	15	Hemagglutinin inhibition - A/Indonesia/05/2005 Antigen	D7POSTVAC1	11APR2011	5	1	0	0	Hemagglutinin inhibition	A/Indonesia/05/2005 Antigen	1.6094379124341	10.5830164234259	39458.96	Female	15	48	Non-Hispanic or Non-Latino	Yes	03	4
47FUR088	Unprimed15	Unprimed (B)	3	3 (Day 7)	80059	Na&#195;&#175;ve	Na&#195;&#175;ve	15	Hemagglutinin inhibition - A/Indonesia/05/2005 Antigen	D7POSTVAC1	11APR2011	5	1	0	0	Hemagglutinin inhibition	A/Indonesia/05/2005 Antigen	1.6094379124341	9.92538699957632	20442.82	Female	15	48	Non-Hispanic or Non-Latino	Yes	03	4
47FUR088	Unprimed15	Unprimed (B)	4	4 (Day 14)	80059	Na&#195;&#175;ve	Na&#195;&#175;ve	15	Hemagglutinin inhibition - A/Indonesia/05/2005 Antigen	D14POSTVAC1	18APR2011	5	1	0	0	Hemagglutinin inhibition	A/Indonesia/05/2005 Antigen	1.6094379124341	10.6047209513327	40324.76	Female	15	48	Non-Hispanic or Non-Latino	Yes	04	4
47FUR088	Unprimed15	Unprimed (B)	4	4 (Day 14)	80059	Na&#195;&#175;ve	Na&#195;&#175;ve	15	Hemagglutinin inhibition - A/Indonesia/05/2005 Antigen	D14POSTVAC1	18APR2011	5	1	0	0	Hemagglutinin inhibition	A/Indonesia/05/2005 Antigen	1.6094379124341	9.90590462905173	20048.4	Female	15	48	Non-Hispanic or Non-Latino	Yes	04	4
47FUR088	Unprimed15	Unprimed (B)	5	5 (Day 28)	80059	Na&#195;&#175;ve	Na&#195;&#175;ve	15	Hemagglutinin inhibition - A/Indonesia/05/2005 Antigen	D28POSTVAC1	04MAY2011	5	1	0	0	Hemagglutinin inhibition	A/Indonesia/05/2005 Antigen	1.6094379124341	10.8992622514019	54136.41	Female	15	48	Non-Hispanic or Non-Latino	Yes	05	4
47FUR088	Unprimed15	Unprimed (B)	5	5 (Day 28)	80059	Na&#195;&#175;ve	Na&#195;&#175;ve	15	Hemagglutinin inhibition - A/Indonesia/05/2005 Antigen	D28POSTVAC1	04MAY2011	5	1	0	0	Hemagglutinin inhibition	A/Indonesia/05/2005 Antigen	1.6094379124341	10.5162071805459	36908.87	Female	15	48	Non-Hispanic or Non-Latino	Yes	05	4
47FUR088	Unprimed15	Unprimed (B)	6	6 (Day 31)	80059	Na&#195;&#175;ve	Na&#195;&#175;ve	15	Hemagglutinin inhibition - A/Indonesia/05/2005 Antigen	D3POSTVAC2	06MAY2011	5	1	0	0	Hemagglutinin inhibition	A/Indonesia/05/2005 Antigen	1.6094379124341	10.8353750205095	50785.95	Female	15	48	Non-Hispanic or Non-Latino	Yes	06	4
47FUR088	Unprimed15	Unprimed (B)	6	6 (Day 31)	80059	Na&#195;&#175;ve	Na&#195;&#175;ve	15	Hemagglutinin inhibition - A/Indonesia/05/2005 Antigen	D3POSTVAC2	06MAY2011	5	1	0	0	Hemagglutinin inhibition	A/Indonesia/05/2005 Antigen	1.6094379124341	10.30470431586	29872.82	Female	15	48	Non-Hispanic or Non-Latino	Yes	06	4
47FUR088	Unprimed15	Unprimed (B)	7	7 (Day 35)	80059	Na&#195;&#175;ve	Na&#195;&#175;ve	15	Hemagglutinin inhibition - A/Indonesia/05/2005 Antigen	D7POSTVAC2	11MAY2011	7.071067812	1.414213562	0	0	Hemagglutinin inhibition	A/Indonesia/05/2005 Antigen	1.95601150273309	11.5461410681036	103377.34	Female	15	48	Non-Hispanic or Non-Latino	Yes	07	4
47FUR088	Unprimed15	Unprimed (B)	7	7 (Day 35)	80059	Na&#195;&#175;ve	Na&#195;&#175;ve	15	Hemagglutinin inhibition - A/Indonesia/05/2005 Antigen	D7POSTVAC2	11MAY2011	7.071067812	1.414213562	0	0	Hemagglutinin inhibition	A/Indonesia/05/2005 Antigen	1.95601150273309	11.1487641393038	69477.91	Female	15	48	Non-Hispanic or Non-Latino	Yes	07	4
47FUR088	Unprimed15	Unprimed (B)	8	8 (Day 42)	80059	Na&#195;&#175;ve	Na&#195;&#175;ve	15	Hemagglutinin inhibition - A/Indonesia/05/2005 Antigen	D14POSTVAC2	18MAY2011	5	1	0	0	Hemagglutinin inhibition	A/Indonesia/05/2005 Antigen	1.6094379124341	11.584710355143	107442.42	Female	15	48	Non-Hispanic or Non-Latino	Yes	08	4
47FUR088	Unprimed15	Unprimed (B)	8	8 (Day 42)	80059	Na&#195;&#175;ve	Na&#195;&#175;ve	15	Hemagglutinin inhibition - A/Indonesia/05/2005 Antigen	D14POSTVAC2	18MAY2011	5	1	0	0	Hemagglutinin inhibition	A/Indonesia/05/2005 Antigen	1.6094379124341	11.0797700444057	64845.97	Female	15	48	Non-Hispanic or Non-Latino	Yes	08	4
47FUR088	Unprimed15	Unprimed (B)	9	9 (Day 56)	80059	Na&#195;&#175;ve	Na&#195;&#175;ve	15	Hemagglutinin inhibition - A/Indonesia/05/2005 Antigen	D28POSTVAC2	31MAY2011	7.071067812	1.414213562	0	0	Hemagglutinin inhibition	A/Indonesia/05/2005 Antigen	1.95601150273309	11.6064574283207	109804.57	Female	15	48	Non-Hispanic or Non-Latino	Yes	09	4
47FUR088	Unprimed15	Unprimed (B)	9	9 (Day 56)	80059	Na&#195;&#175;ve	Na&#195;&#175;ve	15	Hemagglutinin inhibition - A/Indonesia/05/2005 Antigen	D28POSTVAC2	31MAY2011	7.071067812	1.414213562	0	0	Hemagglutinin inhibition	A/Indonesia/05/2005 Antigen	1.95601150273309	11.2132287043451	74104.29	Female	15	48	Non-Hispanic or Non-Latino	Yes	09	4
47FUR088	Unprimed15	Unprimed (B)	10	10 (Day 180 or 208)	80059	Na&#195;&#175;ve	Na&#195;&#175;ve	15	Hemagglutinin inhibition - A/Indonesia/05/2005 Antigen	6MOVAC2	27OCT2011	5	1	0	0	Hemagglutinin inhibition	A/Indonesia/05/2005 Antigen	1.6094379124341	11.4317905694099	92206.93	Female	15	48	Non-Hispanic or Non-Latino	Yes	10	4
47FUR088	Unprimed15	Unprimed (B)	10	10 (Day 180 or 208)	80059	Na&#195;&#175;ve	Na&#195;&#175;ve	15	Hemagglutinin inhibition - A/Indonesia/05/2005 Antigen	6MOVAC2	27OCT2011	5	1	0	0	Hemagglutinin inhibition	A/Indonesia/05/2005 Antigen	1.6094379124341	10.9147736874048	54982.69	Female	15	48	Non-Hispanic or Non-Latino	Yes	10	4
47FUR090	Unprimed15	Unprimed (B)	1	1 (Day 0)	80059	Na&#195;&#175;ve	Na&#195;&#175;ve	15	Hemagglutinin inhibition - A/Indonesia/05/2005 Antigen	PREVAC	07APR2011	5	.	0	.	Hemagglutinin inhibition	A/Indonesia/05/2005 Antigen	1.6094379124341	12.5634366220314	285911.22	Female	15	48	Non-Hispanic or Non-Latino	Yes	01	5
47FUR090	Unprimed15	Unprimed (B)	1	1 (Day 0)	80059	Na&#195;&#175;ve	Na&#195;&#175;ve	15	Hemagglutinin inhibition - A/Indonesia/05/2005 Antigen	PREVAC	07APR2011	5	.	0	.	Hemagglutinin inhibition	A/Indonesia/05/2005 Antigen	1.6094379124341	12.4708221399965	260620.9	Female	15	48	Non-Hispanic or Non-Latino	Yes	01	5
47FUR090	Unprimed15	Unprimed (B)	2	2 (Day 3)	80059	Na&#195;&#175;ve	Na&#195;&#175;ve	15	Hemagglutinin inhibition - A/Indonesia/05/2005 Antigen	D3POSTVAC1	11APR2011	5	1	0	0	Hemagglutinin inhibition	A/Indonesia/05/2005 Antigen	1.6094379124341	12.4747096566602	261636.04	Female	15	48	Non-Hispanic or Non-Latino	Yes	02	5
47FUR090	Unprimed15	Unprimed (B)	2	2 (Day 3)	80059	Na&#195;&#175;ve	Na&#195;&#175;ve	15	Hemagglutinin inhibition - A/Indonesia/05/2005 Antigen	D3POSTVAC1	11APR2011	5	1	0	0	Hemagglutinin inhibition	A/Indonesia/05/2005 Antigen	1.6094379124341	12.1361633006383	186495.67	Female	15	48	Non-Hispanic or Non-Latino	Yes	02	5
47FUR090	Unprimed15	Unprimed (B)	3	3 (Day 7)	80059	Na&#195;&#175;ve	Na&#195;&#175;ve	15	Hemagglutinin inhibition - A/Indonesia/05/2005 Antigen	D7POSTVAC1	13APR2011	5	1	0	0	Hemagglutinin inhibition	A/Indonesia/05/2005 Antigen	1.6094379124341	12.5158229386469	272616.94	Female	15	48	Non-Hispanic or Non-Latino	Yes	03	5
47FUR090	Unprimed15	Unprimed (B)	3	3 (Day 7)	80059	Na&#195;&#175;ve	Na&#195;&#175;ve	15	Hemagglutinin inhibition - A/Indonesia/05/2005 Antigen	D7POSTVAC1	13APR2011	5	1	0	0	Hemagglutinin inhibition	A/Indonesia/05/2005 Antigen	1.6094379124341	12.4238693679973	248666.86	Female	15	48	Non-Hispanic or Non-Latino	Yes	03	5
47FUR090	Unprimed15	Unprimed (B)	4	4 (Day 14)	80059	Na&#195;&#175;ve	Na&#195;&#175;ve	15	Hemagglutinin inhibition - A/Indonesia/05/2005 Antigen	D14POSTVAC1	20APR2011	5	1	0	0	Hemagglutinin inhibition	A/Indonesia/05/2005 Antigen	1.6094379124341	12.3725387496743	236224.7	Female	15	48	Non-Hispanic or Non-Latino	Yes	04	5
47FUR090	Unprimed15	Unprimed (B)	4	4 (Day 14)	80059	Na&#195;&#175;ve	Na&#195;&#175;ve	15	Hemagglutinin inhibition - A/Indonesia/05/2005 Antigen	D14POSTVAC1	20APR2011	5	1	0	0	Hemagglutinin inhibition	A/Indonesia/05/2005 Antigen	1.6094379124341	12.2005141758206	198891.39	Female	15	48	Non-Hispanic or Non-Latino	Yes	04	5
47FUR090	Unprimed15	Unprimed (B)	5	5 (Day 28)	80059	Na&#195;&#175;ve	Na&#195;&#175;ve	15	Hemagglutinin inhibition - A/Indonesia/05/2005 Antigen	D28POSTVAC1	04MAY2011	5	1	0	0	Hemagglutinin inhibition	A/Indonesia/05/2005 Antigen	1.6094379124341	12.2004030537257	198869.29	Female	15	48	Non-Hispanic or Non-Latino	Yes	05	5
47FUR090	Unprimed15	Unprimed (B)	5	5 (Day 28)	80059	Na&#195;&#175;ve	Na&#195;&#175;ve	15	Hemagglutinin inhibition - A/Indonesia/05/2005 Antigen	D28POSTVAC1	04MAY2011	5	1	0	0	Hemagglutinin inhibition	A/Indonesia/05/2005 Antigen	1.6094379124341	11.8830908720334	144797.41	Female	15	48	Non-Hispanic or Non-Latino	Yes	05	5
47FUR090	Unprimed15	Unprimed (B)	6	6 (Day 31)	80059	Na&#195;&#175;ve	Na&#195;&#175;ve	15	Hemagglutinin inhibition - A/Indonesia/05/2005 Antigen	D3POSTVAC2	06MAY2011	5	1	0	0	Hemagglutinin inhibition	A/Indonesia/05/2005 Antigen	1.6094379124341	12.1249655674487	184418.99	Female	15	48	Non-Hispanic or Non-Latino	Yes	06	5
47FUR090	Unprimed15	Unprimed (B)	6	6 (Day 31)	80059	Na&#195;&#175;ve	Na&#195;&#175;ve	15	Hemagglutinin inhibition - A/Indonesia/05/2005 Antigen	D3POSTVAC2	06MAY2011	5	1	0	0	Hemagglutinin inhibition	A/Indonesia/05/2005 Antigen	1.6094379124341	11.8577323006957	141171.72	Female	15	48	Non-Hispanic or Non-Latino	Yes	06	5
47FUR090	Unprimed15	Unprimed (B)	7	7 (Day 35)	80059	Na&#195;&#175;ve	Na&#195;&#175;ve	15	Hemagglutinin inhibition - A/Indonesia/05/2005 Antigen	D7POSTVAC2	11MAY2011	5	1	0	0	Hemagglutinin inhibition	A/Indonesia/05/2005 Antigen	1.6094379124341	12.0829300166288	176827.51	Female	15	48	Non-Hispanic or Non-Latino	Yes	07	5
47FUR090	Unprimed15	Unprimed (B)	7	7 (Day 35)	80059	Na&#195;&#175;ve	Na&#195;&#175;ve	15	Hemagglutinin inhibition - A/Indonesia/05/2005 Antigen	D7POSTVAC2	11MAY2011	5	1	0	0	Hemagglutinin inhibition	A/Indonesia/05/2005 Antigen	1.6094379124341	11.9009629911278	147408.51	Female	15	48	Non-Hispanic or Non-Latino	Yes	07	5
47FUR090	Unprimed15	Unprimed (B)	8	8 (Day 42)	80059	Na&#195;&#175;ve	Na&#195;&#175;ve	15	Hemagglutinin inhibition - A/Indonesia/05/2005 Antigen	D14POSTVAC2	17MAY2011	5	1	0	0	Hemagglutinin inhibition	A/Indonesia/05/2005 Antigen	1.6094379124341	11.9878737865502	160793.11	Female	15	48	Non-Hispanic or Non-Latino	Yes	08	5
47FUR090	Unprimed15	Unprimed (B)	8	8 (Day 42)	80059	Na&#195;&#175;ve	Na&#195;&#175;ve	15	Hemagglutinin inhibition - A/Indonesia/05/2005 Antigen	D14POSTVAC2	17MAY2011	5	1	0	0	Hemagglutinin inhibition	A/Indonesia/05/2005 Antigen	1.6094379124341	11.8062374099077	134086.1	Female	15	48	Non-Hispanic or Non-Latino	Yes	08	5
47FUR090	Unprimed15	Unprimed (B)	9	9 (Day 56)	80059	Na&#195;&#175;ve	Na&#195;&#175;ve	15	Hemagglutinin inhibition - A/Indonesia/05/2005 Antigen	D28POSTVAC2	31MAY2011	5	1	0	0	Hemagglutinin inhibition	A/Indonesia/05/2005 Antigen	1.6094379124341	12.1883413206053	196484.99	Female	15	48	Non-Hispanic or Non-Latino	Yes	09	5
47FUR090	Unprimed15	Unprimed (B)	9	9 (Day 56)	80059	Na&#195;&#175;ve	Na&#195;&#175;ve	15	Hemagglutinin inhibition - A/Indonesia/05/2005 Antigen	D28POSTVAC2	31MAY2011	5	1	0	0	Hemagglutinin inhibition	A/Indonesia/05/2005 Antigen	1.6094379124341	11.9499361382628	154807.26	Female	15	48	Non-Hispanic or Non-Latino	Yes	09	5
47FUR090	Unprimed15	Unprimed (B)	10	10 (Day 180 or 208)	80059	Na&#195;&#175;ve	Na&#195;&#175;ve	15	Hemagglutinin inhibition - A/Indonesia/05/2005 Antigen	6MOVAC2	27OCT2011	5	1	0	0	Hemagglutinin inhibition	A/Indonesia/05/2005 Antigen	1.6094379124341	11.8085690850254	134399.11	Female	15	48	Non-Hispanic or Non-Latino	Yes	10	5
47FUR090	Unprimed15	Unprimed (B)	10	10 (Day 180 or 208)	80059	Na&#195;&#175;ve	Na&#195;&#175;ve	15	Hemagglutinin inhibition - A/Indonesia/05/2005 Antigen	6MOVAC2	27OCT2011	5	1	0	0	Hemagglutinin inhibition	A/Indonesia/05/2005 Antigen	1.6094379124341	11.5144773601577	100155.31	Female	15	48	Non-Hispanic or Non-Latino	Yes	10	5
47FUR091	Unprimed90	Unprimed (B)	1	1 (Day 0)	80059	Na&#195;&#175;ve	Na&#195;&#175;ve	90	Hemagglutinin inhibition - A/Indonesia/05/2005 Antigen	PREVAC	13APR2011	5	.	0	.	Hemagglutinin inhibition	A/Indonesia/05/2005 Antigen	1.6094379124341	11.6020393967083	109320.52	Female	90	61	Non-Hispanic or Non-Latino	Yes	01	3
47FUR091	Unprimed90	Unprimed (B)	1	1 (Day 0)	80059	Na&#195;&#175;ve	Na&#195;&#175;ve	90	Hemagglutinin inhibition - A/Indonesia/05/2005 Antigen	PREVAC	13APR2011	5	.	0	.	Hemagglutinin inhibition	A/Indonesia/05/2005 Antigen	1.6094379124341	11.676442656039	117764.56	Female	90	61	Non-Hispanic or Non-Latino	Yes	01	3
47FUR091	Unprimed90	Unprimed (B)	1	1 (Day 0)	80059	Na&#195;&#175;ve	Na&#195;&#175;ve	90	Hemagglutinin inhibition - A/Indonesia/05/2005 Antigen	PREVAC	13APR2011	5	.	0	.	Hemagglutinin inhibition	A/Indonesia/05/2005 Antigen	1.6094379124341	11.7375434487744	125184.44	Female	90	61	Non-Hispanic or Non-Latino	Yes	01	4
47FUR091	Unprimed90	Unprimed (B)	1	1 (Day 0)	80059	Na&#195;&#175;ve	Na&#195;&#175;ve	90	Hemagglutinin inhibition - A/Indonesia/05/2005 Antigen	PREVAC	13APR2011	5	.	0	.	Hemagglutinin inhibition	A/Indonesia/05/2005 Antigen	1.6094379124341	11.7407805396064	125590.33	Female	90	61	Non-Hispanic or Non-Latino	Yes	01	1
47FUR091	Unprimed90	Unprimed (B)	1	1 (Day 0)	80059	Na&#195;&#175;ve	Na&#195;&#175;ve	90	Hemagglutinin inhibition - A/Indonesia/05/2005 Antigen	PREVAC	13APR2011	5	.	0	.	Hemagglutinin inhibition	A/Indonesia/05/2005 Antigen	1.6094379124341	11.7608933665384	128141.88	Female	90	61	Non-Hispanic or Non-Latino	Yes	01	4
47FUR091	Unprimed90	Unprimed (B)	1	1 (Day 0)	80059	Na&#195;&#175;ve	Na&#195;&#175;ve	90	Hemagglutinin inhibition - A/Indonesia/05/2005 Antigen	PREVAC	13APR2011	5	.	0	.	Hemagglutinin inhibition	A/Indonesia/05/2005 Antigen	1.6094379124341	11.8084037428814	134376.89	Female	90	61	Non-Hispanic or Non-Latino	Yes	01	1
47FUR091	Unprimed90	Unprimed (B)	1	1 (Day 0)	80059	Na&#195;&#175;ve	Na&#195;&#175;ve	90	Hemagglutinin inhibition - A/Indonesia/05/2005 Antigen	PREVAC	13APR2011	5	.	0	.	Hemagglutinin inhibition	A/Indonesia/05/2005 Antigen	1.6094379124341	11.9238017064537	150813.87	Female	90	61	Non-Hispanic or Non-Latino	Yes	01	5
47FUR091	Unprimed90	Unprimed (B)	1	1 (Day 0)	80059	Na&#195;&#175;ve	Na&#195;&#175;ve	90	Hemagglutinin inhibition - A/Indonesia/05/2005 Antigen	PREVAC	13APR2011	5	.	0	.	Hemagglutinin inhibition	A/Indonesia/05/2005 Antigen	1.6094379124341	12.0446707977465	170190.01	Female	90	61	Non-Hispanic or Non-Latino	Yes	01	2
47FUR091	Unprimed90	Unprimed (B)	1	1 (Day 0)	80059	Na&#195;&#175;ve	Na&#195;&#175;ve	90	Hemagglutinin inhibition - A/Indonesia/05/2005 Antigen	PREVAC	13APR2011	5	.	0	.	Hemagglutinin inhibition	A/Indonesia/05/2005 Antigen	1.6094379124341	12.5495347885931	281964.03	Female	90	61	Non-Hispanic or Non-Latino	Yes	01	2
47FUR091	Unprimed90	Unprimed (B)	1	1 (Day 0)	80059	Na&#195;&#175;ve	Na&#195;&#175;ve	90	Hemagglutinin inhibition - A/Indonesia/05/2005 Antigen	PREVAC	13APR2011	5	.	0	.	Hemagglutinin inhibition	A/Indonesia/05/2005 Antigen	1.6094379124341	11.3031897505395	81079.85	Female	90	61	Non-Hispanic or Non-Latino	Yes	01	5
47FUR091	Unprimed90	Unprimed (B)	5	5 (Day 28)	80059	Na&#195;&#175;ve	Na&#195;&#175;ve	90	Hemagglutinin inhibition - A/Indonesia/05/2005 Antigen	D28POSTVAC1	12MAY2011	160	32	1	1	Hemagglutinin inhibition	A/Indonesia/05/2005 Antigen	5.07517381523382	13.4188452527691	672559.09	Female	90	61	Non-Hispanic or Non-Latino	Yes	05	5
47FUR091	Unprimed90	Unprimed (B)	5	5 (Day 28)	80059	Na&#195;&#175;ve	Na&#195;&#175;ve	90	Hemagglutinin inhibition - A/Indonesia/05/2005 Antigen	D28POSTVAC1	12MAY2011	160	32	1	1	Hemagglutinin inhibition	A/Indonesia/05/2005 Antigen	5.07517381523382	13.5123547693456	738484.04	Female	90	61	Non-Hispanic or Non-Latino	Yes	05	3
47FUR091	Unprimed90	Unprimed (B)	5	5 (Day 28)	80059	Na&#195;&#175;ve	Na&#195;&#175;ve	90	Hemagglutinin inhibition - A/Indonesia/05/2005 Antigen	D28POSTVAC1	12MAY2011	160	32	1	1	Hemagglutinin inhibition	A/Indonesia/05/2005 Antigen	5.07517381523382	13.7526700610339	939093.25	Female	90	61	Non-Hispanic or Non-Latino	Yes	05	5
47FUR091	Unprimed90	Unprimed (B)	5	5 (Day 28)	80059	Na&#195;&#175;ve	Na&#195;&#175;ve	90	Hemagglutinin inhibition - A/Indonesia/05/2005 Antigen	D28POSTVAC1	12MAY2011	160	32	1	1	Hemagglutinin inhibition	A/Indonesia/05/2005 Antigen	5.07517381523382	13.7586111258797	944689.07	Female	90	61	Non-Hispanic or Non-Latino	Yes	05	4
47FUR091	Unprimed90	Unprimed (B)	5	5 (Day 28)	80059	Na&#195;&#175;ve	Na&#195;&#175;ve	90	Hemagglutinin inhibition - A/Indonesia/05/2005 Antigen	D28POSTVAC1	12MAY2011	160	32	1	1	Hemagglutinin inhibition	A/Indonesia/05/2005 Antigen	5.07517381523382	13.7609342699192	946886.27	Female	90	61	Non-Hispanic or Non-Latino	Yes	05	3
47FUR091	Unprimed90	Unprimed (B)	5	5 (Day 28)	80059	Na&#195;&#175;ve	Na&#195;&#175;ve	90	Hemagglutinin inhibition - A/Indonesia/05/2005 Antigen	D28POSTVAC1	12MAY2011	160	32	1	1	Hemagglutinin inhibition	A/Indonesia/05/2005 Antigen	5.07517381523382	13.8450693602058	1030000	Female	90	61	Non-Hispanic or Non-Latino	Yes	05	1
47FUR091	Unprimed90	Unprimed (B)	5	5 (Day 28)	80059	Na&#195;&#175;ve	Na&#195;&#175;ve	90	Hemagglutinin inhibition - A/Indonesia/05/2005 Antigen	D28POSTVAC1	12MAY2011	160	32	1	1	Hemagglutinin inhibition	A/Indonesia/05/2005 Antigen	5.07517381523382	13.9894638650877	1190000	Female	90	61	Non-Hispanic or Non-Latino	Yes	05	1
47FUR091	Unprimed90	Unprimed (B)	5	5 (Day 28)	80059	Na&#195;&#175;ve	Na&#195;&#175;ve	90	Hemagglutinin inhibition - A/Indonesia/05/2005 Antigen	D28POSTVAC1	12MAY2011	160	32	1	1	Hemagglutinin inhibition	A/Indonesia/05/2005 Antigen	5.07517381523382	14.0931422945625	1320000	Female	90	61	Non-Hispanic or Non-Latino	Yes	05	4
47FUR091	Unprimed90	Unprimed (B)	5	5 (Day 28)	80059	Na&#195;&#175;ve	Na&#195;&#175;ve	90	Hemagglutinin inhibition - A/Indonesia/05/2005 Antigen	D28POSTVAC1	12MAY2011	160	32	1	1	Hemagglutinin inhibition	A/Indonesia/05/2005 Antigen	5.07517381523382	14.3751263458996	1750000	Female	90	61	Non-Hispanic or Non-Latino	Yes	05	2
47FUR091	Unprimed90	Unprimed (B)	5	5 (Day 28)	80059	Na&#195;&#175;ve	Na&#195;&#175;ve	90	Hemagglutinin inhibition - A/Indonesia/05/2005 Antigen	D28POSTVAC1	12MAY2011	160	32	1	1	Hemagglutinin inhibition	A/Indonesia/05/2005 Antigen	5.07517381523382	.	.	Female	90	61	Non-Hispanic or Non-Latino	Yes	05	2
47FUR093	Primed15	Primed (A)	1	1 (Day 0)	80059	Previously Vaccinated	PriorDoseLow	15	Hemagglutinin inhibition - A/Indonesia/05/2005 Antigen	PREVAC	05MAY2011	5	.	0	.	Hemagglutinin inhibition	A/Indonesia/05/2005 Antigen	1.6094379124341	10.6729761378527	43173.24	Female	15	23	Non-Hispanic or Non-Latino	Yes	01	2
47FUR093	Primed15	Primed (A)	1	1 (Day 0)	80059	Previously Vaccinated	PriorDoseLow	15	Hemagglutinin inhibition - A/Indonesia/05/2005 Antigen	PREVAC	05MAY2011	5	.	0	.	Hemagglutinin inhibition	A/Indonesia/05/2005 Antigen	1.6094379124341	9.90410536165276	20012.36	Female	15	23	Non-Hispanic or Non-Latino	Yes	01	2
47FUR093	Primed15	Primed (A)	2	2 (Day 3)	80059	Previously Vaccinated	PriorDoseLow	15	Hemagglutinin inhibition - A/Indonesia/05/2005 Antigen	DAY3	09MAY2011	5	1	0	0	Hemagglutinin inhibition	A/Indonesia/05/2005 Antigen	1.6094379124341	10.3820243579554	32274.23	Female	15	23	Non-Hispanic or Non-Latino	Yes	02	2
47FUR093	Primed15	Primed (A)	2	2 (Day 3)	80059	Previously Vaccinated	PriorDoseLow	15	Hemagglutinin inhibition - A/Indonesia/05/2005 Antigen	DAY3	09MAY2011	5	1	0	0	Hemagglutinin inhibition	A/Indonesia/05/2005 Antigen	1.6094379124341	9.84402253936363	18845.37	Female	15	23	Non-Hispanic or Non-Latino	Yes	02	2
47FUR093	Primed15	Primed (A)	3	3 (Day 7)	80059	Previously Vaccinated	PriorDoseLow	15	Hemagglutinin inhibition - A/Indonesia/05/2005 Antigen	DAY7	12MAY2011	40	8	1	1	Hemagglutinin inhibition	A/Indonesia/05/2005 Antigen	3.68887945411393	12.6443344151476	310002.12	Female	15	23	Non-Hispanic or Non-Latino	Yes	03	2
47FUR093	Primed15	Primed (A)	3	3 (Day 7)	80059	Previously Vaccinated	PriorDoseLow	15	Hemagglutinin inhibition - A/Indonesia/05/2005 Antigen	DAY7	12MAY2011	40	8	1	1	Hemagglutinin inhibition	A/Indonesia/05/2005 Antigen	3.68887945411393	12.5819096783308	291241.96	Female	15	23	Non-Hispanic or Non-Latino	Yes	03	2
47FUR093	Primed15	Primed (A)	4	4 (Day 14)	80059	Previously Vaccinated	PriorDoseLow	15	Hemagglutinin inhibition - A/Indonesia/05/2005 Antigen	DAY14	18MAY2011	113.137085	22.627417	1	1	Hemagglutinin inhibition	A/Indonesia/05/2005 Antigen	4.72860022504359	13.5194715030053	743758.38	Female	15	23	Non-Hispanic or Non-Latino	Yes	04	2
47FUR093	Primed15	Primed (A)	4	4 (Day 14)	80059	Previously Vaccinated	PriorDoseLow	15	Hemagglutinin inhibition - A/Indonesia/05/2005 Antigen	DAY14	18MAY2011	113.137085	22.627417	1	1	Hemagglutinin inhibition	A/Indonesia/05/2005 Antigen	4.72860022504359	13.4385289217099	685928.67	Female	15	23	Non-Hispanic or Non-Latino	Yes	04	2
47FUR093	Primed15	Primed (A)	5	5 (Day 28)	80059	Previously Vaccinated	PriorDoseLow	15	Hemagglutinin inhibition - A/Indonesia/05/2005 Antigen	DAY28	01JUN2011	80	16	1	1	Hemagglutinin inhibition	A/Indonesia/05/2005 Antigen	4.38202663467388	13.4941641194991	725171.98	Female	15	23	Non-Hispanic or Non-Latino	Yes	05	2
47FUR093	Primed15	Primed (A)	5	5 (Day 28)	80059	Previously Vaccinated	PriorDoseLow	15	Hemagglutinin inhibition - A/Indonesia/05/2005 Antigen	DAY28	01JUN2011	80	16	1	1	Hemagglutinin inhibition	A/Indonesia/05/2005 Antigen	4.38202663467388	13.4676297463285	706183.04	Female	15	23	Non-Hispanic or Non-Latino	Yes	05	2
47FUR093	Primed15	Primed (A)	9	9 (Day 56)	80059	Previously Vaccinated	PriorDoseLow	15	Hemagglutinin inhibition - A/Indonesia/05/2005 Antigen	DAY56	28JUN2011	80	16	1	1	Hemagglutinin inhibition	A/Indonesia/05/2005 Antigen	4.38202663467388	13.4247388265438	676534.57	Female	15	23	Non-Hispanic or Non-Latino	Yes	09	2
47FUR093	Primed15	Primed (A)	9	9 (Day 56)	80059	Previously Vaccinated	PriorDoseLow	15	Hemagglutinin inhibition - A/Indonesia/05/2005 Antigen	DAY56	28JUN2011	80	16	1	1	Hemagglutinin inhibition	A/Indonesia/05/2005 Antigen	4.38202663467388	13.3796034432543	646677.79	Female	15	23	Non-Hispanic or Non-Latino	Yes	09	2
47FUR093	Primed15	Primed (A)	10	10 (Day 180 or 208)	80059	Previously Vaccinated	PriorDoseLow	15	Hemagglutinin inhibition - A/Indonesia/05/2005 Antigen	DAY180	26OCT2011	56.5685425	11.3137085	1	1	Hemagglutinin inhibition	A/Indonesia/05/2005 Antigen	4.03545304448364	13.0201738953674	451429.23	Female	15	23	Non-Hispanic or Non-Latino	Yes	10	2
47FUR093	Primed15	Primed (A)	10	10 (Day 180 or 208)	80059	Previously Vaccinated	PriorDoseLow	15	Hemagglutinin inhibition - A/Indonesia/05/2005 Antigen	DAY180	26OCT2011	56.5685425	11.3137085	1	1	Hemagglutinin inhibition	A/Indonesia/05/2005 Antigen	4.03545304448364	12.9800314303945	433666.65	Female	15	23	Non-Hispanic or Non-Latino	Yes	10	2
47FUR098	Primed15	Primed (A)	1	1 (Day 0)	80059	Previously Vaccinated	PriorDoseLow	15	Hemagglutinin inhibition - A/Indonesia/05/2005 Antigen	PREVAC	17MAY2011	5	.	0	.	Hemagglutinin inhibition	A/Indonesia/05/2005 Antigen	1.6094379124341	11.433277745945	92344.16	Female	15	52	Non-Hispanic or Non-Latino	Yes	01	3
47FUR098	Primed15	Primed (A)	1	1 (Day 0)	80059	Previously Vaccinated	PriorDoseLow	15	Hemagglutinin inhibition - A/Indonesia/05/2005 Antigen	PREVAC	17MAY2011	5	.	0	.	Hemagglutinin inhibition	A/Indonesia/05/2005 Antigen	1.6094379124341	11.2418903268949	76258.97	Female	15	52	Non-Hispanic or Non-Latino	Yes	01	3
47FUR098	Primed15	Primed (A)	2	2 (Day 3)	80059	Previously Vaccinated	PriorDoseLow	15	Hemagglutinin inhibition - A/Indonesia/05/2005 Antigen	DAY3	20MAY2011	5	1	0	0	Hemagglutinin inhibition	A/Indonesia/05/2005 Antigen	1.6094379124341	11.54085604918	102832.43	Female	15	52	Non-Hispanic or Non-Latino	Yes	02	3
47FUR098	Primed15	Primed (A)	2	2 (Day 3)	80059	Previously Vaccinated	PriorDoseLow	15	Hemagglutinin inhibition - A/Indonesia/05/2005 Antigen	DAY3	20MAY2011	5	1	0	0	Hemagglutinin inhibition	A/Indonesia/05/2005 Antigen	1.6094379124341	11.3445567529266	84504.22	Female	15	52	Non-Hispanic or Non-Latino	Yes	02	3
47FUR098	Primed15	Primed (A)	3	3 (Day 7)	80059	Previously Vaccinated	PriorDoseLow	15	Hemagglutinin inhibition - A/Indonesia/05/2005 Antigen	DAY7	25MAY2011	25.198421	5.0396842	0	0	Hemagglutinin inhibition	A/Indonesia/05/2005 Antigen	3.22678133382407	12.8823523669702	393309.6	Female	15	52	Non-Hispanic or Non-Latino	Yes	03	3
47FUR098	Primed15	Primed (A)	3	3 (Day 7)	80059	Previously Vaccinated	PriorDoseLow	15	Hemagglutinin inhibition - A/Indonesia/05/2005 Antigen	DAY7	25MAY2011	25.198421	5.0396842	0	0	Hemagglutinin inhibition	A/Indonesia/05/2005 Antigen	3.22678133382407	12.7917908114514	359256.11	Female	15	52	Non-Hispanic or Non-Latino	Yes	03	3
47FUR098	Primed15	Primed (A)	4	4 (Day 14)	80059	Previously Vaccinated	PriorDoseLow	15	Hemagglutinin inhibition - A/Indonesia/05/2005 Antigen	DAY14	02JUN2011	56.5685425	11.3137085	1	1	Hemagglutinin inhibition	A/Indonesia/05/2005 Antigen	4.03545304448364	13.3207948859394	609744.25	Female	15	52	Non-Hispanic or Non-Latino	Yes	04	3
47FUR098	Primed15	Primed (A)	4	4 (Day 14)	80059	Previously Vaccinated	PriorDoseLow	15	Hemagglutinin inhibition - A/Indonesia/05/2005 Antigen	DAY14	02JUN2011	56.5685425	11.3137085	1	1	Hemagglutinin inhibition	A/Indonesia/05/2005 Antigen	4.03545304448364	13.0032948909099	443873.5	Female	15	52	Non-Hispanic or Non-Latino	Yes	04	3
47FUR098	Primed15	Primed (A)	5	5 (Day 28)	80059	Previously Vaccinated	PriorDoseLow	15	Hemagglutinin inhibition - A/Indonesia/05/2005 Antigen	DAY28	14JUN2011	40	8	1	1	Hemagglutinin inhibition	A/Indonesia/05/2005 Antigen	3.68887945411393	13.0720725698326	475476.42	Female	15	52	Non-Hispanic or Non-Latino	Yes	05	3
47FUR098	Primed15	Primed (A)	5	5 (Day 28)	80059	Previously Vaccinated	PriorDoseLow	15	Hemagglutinin inhibition - A/Indonesia/05/2005 Antigen	DAY28	14JUN2011	40	8	1	1	Hemagglutinin inhibition	A/Indonesia/05/2005 Antigen	3.68887945411393	12.9597152866244	424945.11	Female	15	52	Non-Hispanic or Non-Latino	Yes	05	3
47FUR098	Primed15	Primed (A)	9	9 (Day 56)	80059	Previously Vaccinated	PriorDoseLow	15	Hemagglutinin inhibition - A/Indonesia/05/2005 Antigen	DAY56	12JUL2011	20	4	0	0	Hemagglutinin inhibition	A/Indonesia/05/2005 Antigen	2.99573227355399	13.0433924401796	462033.39	Female	15	52	Non-Hispanic or Non-Latino	Yes	09	3
47FUR098	Primed15	Primed (A)	9	9 (Day 56)	80059	Previously Vaccinated	PriorDoseLow	15	Hemagglutinin inhibition - A/Indonesia/05/2005 Antigen	DAY56	12JUL2011	20	4	0	0	Hemagglutinin inhibition	A/Indonesia/05/2005 Antigen	2.99573227355399	12.6224900575962	303303.75	Female	15	52	Non-Hispanic or Non-Latino	Yes	09	3
47FUR098	Primed15	Primed (A)	10	10 (Day 180 or 208)	80059	Previously Vaccinated	PriorDoseLow	15	Hemagglutinin inhibition - A/Indonesia/05/2005 Antigen	DAY180	08NOV2011	5	1	0	0	Hemagglutinin inhibition	A/Indonesia/05/2005 Antigen	1.6094379124341	12.5885755962796	293189.84	Female	15	52	Non-Hispanic or Non-Latino	Yes	10	3
47FUR098	Primed15	Primed (A)	10	10 (Day 180 or 208)	80059	Previously Vaccinated	PriorDoseLow	15	Hemagglutinin inhibition - A/Indonesia/05/2005 Antigen	DAY180	08NOV2011	5	1	0	0	Hemagglutinin inhibition	A/Indonesia/05/2005 Antigen	1.6094379124341	12.2442450209078	207782.06	Female	15	52	Non-Hispanic or Non-Latino	Yes	10	3
47FUR102	Primed90	Primed (A)	1	1 (Day 0)	80059	Previously Vaccinated	PriorDoseLow	90	Hemagglutinin inhibition - A/Indonesia/05/2005 Antigen	PREVAC	23MAY2011	5	.	0	.	Hemagglutinin inhibition	A/Indonesia/05/2005 Antigen	1.6094379124341	11.1471988205747	69369.24	Female	90	46	Non-Hispanic or Non-Latino	Yes	01	1
47FUR102	Primed90	Primed (A)	1	1 (Day 0)	80059	Previously Vaccinated	PriorDoseLow	90	Hemagglutinin inhibition - A/Indonesia/05/2005 Antigen	PREVAC	23MAY2011	5	.	0	.	Hemagglutinin inhibition	A/Indonesia/05/2005 Antigen	1.6094379124341	11.0010771517689	59938.67	Female	90	46	Non-Hispanic or Non-Latino	Yes	01	1
47FUR102	Primed90	Primed (A)	2	2 (Day 3)	80059	Previously Vaccinated	PriorDoseLow	90	Hemagglutinin inhibition - A/Indonesia/05/2005 Antigen	DAY3	25MAY2011	5	1	0	0	Hemagglutinin inhibition	A/Indonesia/05/2005 Antigen	1.6094379124341	11.3177061282596	82265.42	Female	90	46	Non-Hispanic or Non-Latino	Yes	02	1
47FUR102	Primed90	Primed (A)	2	2 (Day 3)	80059	Previously Vaccinated	PriorDoseLow	90	Hemagglutinin inhibition - A/Indonesia/05/2005 Antigen	DAY3	25MAY2011	5	1	0	0	Hemagglutinin inhibition	A/Indonesia/05/2005 Antigen	1.6094379124341	11.2027372179295	73330.89	Female	90	46	Non-Hispanic or Non-Latino	Yes	02	1
47FUR102	Primed90	Primed (A)	3	3 (Day 7)	80059	Previously Vaccinated	PriorDoseLow	90	Hemagglutinin inhibition - A/Indonesia/05/2005 Antigen	DAY7	31MAY2011	80	16	1	1	Hemagglutinin inhibition	A/Indonesia/05/2005 Antigen	4.38202663467388	13.6061258679146	811083.16	Female	90	46	Non-Hispanic or Non-Latino	Yes	03	1
47FUR102	Primed90	Primed (A)	3	3 (Day 7)	80059	Previously Vaccinated	PriorDoseLow	90	Hemagglutinin inhibition - A/Indonesia/05/2005 Antigen	DAY7	31MAY2011	80	16	1	1	Hemagglutinin inhibition	A/Indonesia/05/2005 Antigen	4.38202663467388	13.3851726043997	650289.29	Female	90	46	Non-Hispanic or Non-Latino	Yes	03	1
47FUR102	Primed90	Primed (A)	4	4 (Day 14)	80059	Previously Vaccinated	PriorDoseLow	90	Hemagglutinin inhibition - A/Indonesia/05/2005 Antigen	DAY14	06JUN2011	113.137085	22.627417	1	1	Hemagglutinin inhibition	A/Indonesia/05/2005 Antigen	4.72860022504359	13.8254608888174	1010000	Female	90	46	Non-Hispanic or Non-Latino	Yes	04	1
47FUR102	Primed90	Primed (A)	4	4 (Day 14)	80059	Previously Vaccinated	PriorDoseLow	90	Hemagglutinin inhibition - A/Indonesia/05/2005 Antigen	DAY14	06JUN2011	113.137085	22.627417	1	1	Hemagglutinin inhibition	A/Indonesia/05/2005 Antigen	4.72860022504359	13.7122172707832	901862.43	Female	90	46	Non-Hispanic or Non-Latino	Yes	04	1
47FUR102	Primed90	Primed (A)	5	5 (Day 28)	80059	Previously Vaccinated	PriorDoseLow	90	Hemagglutinin inhibition - A/Indonesia/05/2005 Antigen	DAY28	20JUN2011	80	16	1	1	Hemagglutinin inhibition	A/Indonesia/05/2005 Antigen	4.38202663467388	13.0710501670289	474990.54	Female	90	46	Non-Hispanic or Non-Latino	Yes	05	1
47FUR102	Primed90	Primed (A)	5	5 (Day 28)	80059	Previously Vaccinated	PriorDoseLow	90	Hemagglutinin inhibition - A/Indonesia/05/2005 Antigen	DAY28	20JUN2011	80	16	1	1	Hemagglutinin inhibition	A/Indonesia/05/2005 Antigen	4.38202663467388	13.0248165662037	453529.94	Female	90	46	Non-Hispanic or Non-Latino	Yes	05	1
47FUR102	Primed90	Primed (A)	9	9 (Day 56)	80059	Previously Vaccinated	PriorDoseLow	90	Hemagglutinin inhibition - A/Indonesia/05/2005 Antigen	DAY56	18JUL2011	40	8	1	1	Hemagglutinin inhibition	A/Indonesia/05/2005 Antigen	3.68887945411393	12.7684367391257	350963.23	Female	90	46	Non-Hispanic or Non-Latino	Yes	09	1
47FUR102	Primed90	Primed (A)	9	9 (Day 56)	80059	Previously Vaccinated	PriorDoseLow	90	Hemagglutinin inhibition - A/Indonesia/05/2005 Antigen	DAY56	18JUL2011	40	8	1	1	Hemagglutinin inhibition	A/Indonesia/05/2005 Antigen	3.68887945411393	12.5658395843222	286599.08	Female	90	46	Non-Hispanic or Non-Latino	Yes	09	1
47FUR102	Primed90	Primed (A)	10	10 (Day 180 or 208)	80059	Previously Vaccinated	PriorDoseLow	90	Hemagglutinin inhibition - A/Indonesia/05/2005 Antigen	DAY180	21NOV2011	5	1	0	0	Hemagglutinin inhibition	A/Indonesia/05/2005 Antigen	1.6094379124341	12.0908956611703	178241.68	Female	90	46	Non-Hispanic or Non-Latino	Yes	10	1
47FUR102	Primed90	Primed (A)	10	10 (Day 180 or 208)	80059	Previously Vaccinated	PriorDoseLow	90	Hemagglutinin inhibition - A/Indonesia/05/2005 Antigen	DAY180	21NOV2011	5	1	0	0	Hemagglutinin inhibition	A/Indonesia/05/2005 Antigen	1.6094379124341	12.0785084991395	176047.39	Female	90	46	Non-Hispanic or Non-Latino	Yes	10	1
47FUR103	Primed15	Primed (A)	1	1 (Day 0)	80059	Previously Vaccinated	PriorDoseHigh	15	Hemagglutinin inhibition - A/Indonesia/05/2005 Antigen	PREVAC	23MAY2011	5	.	0	.	Hemagglutinin inhibition	A/Indonesia/05/2005 Antigen	1.6094379124341	12.454086003491	256295.41	Female	15	48	Non-Hispanic or Non-Latino	Yes	01	4
47FUR103	Primed15	Primed (A)	1	1 (Day 0)	80059	Previously Vaccinated	PriorDoseHigh	15	Hemagglutinin inhibition - A/Indonesia/05/2005 Antigen	PREVAC	23MAY2011	5	.	0	.	Hemagglutinin inhibition	A/Indonesia/05/2005 Antigen	1.6094379124341	12.1905283566276	196915.18	Female	15	48	Non-Hispanic or Non-Latino	Yes	01	4
47FUR103	Primed15	Primed (A)	2	2 (Day 3)	80059	Previously Vaccinated	PriorDoseHigh	15	Hemagglutinin inhibition - A/Indonesia/05/2005 Antigen	DAY3	25MAY2011	5	1	0	0	Hemagglutinin inhibition	A/Indonesia/05/2005 Antigen	1.6094379124341	11.9174440586082	149858.09	Female	15	48	Non-Hispanic or Non-Latino	Yes	02	4
47FUR103	Primed15	Primed (A)	2	2 (Day 3)	80059	Previously Vaccinated	PriorDoseHigh	15	Hemagglutinin inhibition - A/Indonesia/05/2005 Antigen	DAY3	25MAY2011	5	1	0	0	Hemagglutinin inhibition	A/Indonesia/05/2005 Antigen	1.6094379124341	11.4193797675508	91069.64	Female	15	48	Non-Hispanic or Non-Latino	Yes	02	4
47FUR103	Primed15	Primed (A)	3	3 (Day 7)	80059	Previously Vaccinated	PriorDoseHigh	15	Hemagglutinin inhibition - A/Indonesia/05/2005 Antigen	DAY7	31MAY2011	640	128	1	1	Hemagglutinin inhibition	A/Indonesia/05/2005 Antigen	6.46146817635371	14.7632999568978	2580000	Female	15	48	Non-Hispanic or Non-Latino	Yes	03	4
47FUR103	Primed15	Primed (A)	3	3 (Day 7)	80059	Previously Vaccinated	PriorDoseHigh	15	Hemagglutinin inhibition - A/Indonesia/05/2005 Antigen	DAY7	31MAY2011	640	128	1	1	Hemagglutinin inhibition	A/Indonesia/05/2005 Antigen	6.46146817635371	14.3223281603327	1660000	Female	15	48	Non-Hispanic or Non-Latino	Yes	03	4
47FUR103	Primed15	Primed (A)	4	4 (Day 14)	80059	Previously Vaccinated	PriorDoseHigh	15	Hemagglutinin inhibition - A/Indonesia/05/2005 Antigen	DAY14	06JUN2011	452.54834	90.50966799	1	1	Hemagglutinin inhibition	A/Indonesia/05/2005 Antigen	6.11489458616348	14.3162858458767	1650000	Female	15	48	Non-Hispanic or Non-Latino	Yes	04	4
47FUR103	Primed15	Primed (A)	4	4 (Day 14)	80059	Previously Vaccinated	PriorDoseHigh	15	Hemagglutinin inhibition - A/Indonesia/05/2005 Antigen	DAY14	06JUN2011	452.54834	90.50966799	1	1	Hemagglutinin inhibition	A/Indonesia/05/2005 Antigen	6.11489458616348	14.2342208928224	1520000	Female	15	48	Non-Hispanic or Non-Latino	Yes	04	4
47FUR103	Primed15	Primed (A)	5	5 (Day 28)	80059	Previously Vaccinated	PriorDoseHigh	15	Hemagglutinin inhibition - A/Indonesia/05/2005 Antigen	DAY28	20JUN2011	320	64	1	1	Hemagglutinin inhibition	A/Indonesia/05/2005 Antigen	5.76832099579377	14.4833399305399	1950000	Female	15	48	Non-Hispanic or Non-Latino	Yes	05	4
47FUR103	Primed15	Primed (A)	5	5 (Day 28)	80059	Previously Vaccinated	PriorDoseHigh	15	Hemagglutinin inhibition - A/Indonesia/05/2005 Antigen	DAY28	20JUN2011	320	64	1	1	Hemagglutinin inhibition	A/Indonesia/05/2005 Antigen	5.76832099579377	13.3245307958539	612026.46	Female	15	48	Non-Hispanic or Non-Latino	Yes	05	4
47FUR103	Primed15	Primed (A)	9	9 (Day 56)	80059	Previously Vaccinated	PriorDoseHigh	15	Hemagglutinin inhibition - A/Indonesia/05/2005 Antigen	DAY56	20JUL2011	320	64	1	1	Hemagglutinin inhibition	A/Indonesia/05/2005 Antigen	5.76832099579377	13.5765091452738	787413.77	Female	15	48	Non-Hispanic or Non-Latino	Yes	09	4
47FUR103	Primed15	Primed (A)	9	9 (Day 56)	80059	Previously Vaccinated	PriorDoseHigh	15	Hemagglutinin inhibition - A/Indonesia/05/2005 Antigen	DAY56	20JUL2011	320	64	1	1	Hemagglutinin inhibition	A/Indonesia/05/2005 Antigen	5.76832099579377	13.4798513567401	714866.69	Female	15	48	Non-Hispanic or Non-Latino	Yes	09	4
47FUR103	Primed15	Primed (A)	10	10 (Day 180 or 208)	80059	Previously Vaccinated	PriorDoseHigh	15	Hemagglutinin inhibition - A/Indonesia/05/2005 Antigen	DAY180	15NOV2011	80	16	1	1	Hemagglutinin inhibition	A/Indonesia/05/2005 Antigen	4.38202663467388	13.5415591470515	760369.02	Female	15	48	Non-Hispanic or Non-Latino	Yes	10	4
47FUR103	Primed15	Primed (A)	10	10 (Day 180 or 208)	80059	Previously Vaccinated	PriorDoseHigh	15	Hemagglutinin inhibition - A/Indonesia/05/2005 Antigen	DAY180	15NOV2011	80	16	1	1	Hemagglutinin inhibition	A/Indonesia/05/2005 Antigen	4.38202663467388	13.3086342088702	602374.25	Female	15	48	Non-Hispanic or Non-Latino	Yes	10	4
47FUR104	Primed15	Primed (A)	1	1 (Day 0)	80059	Previously Vaccinated	PriorDoseLow	15	Hemagglutinin inhibition - A/Indonesia/05/2005 Antigen	PREVAC	24MAY2011	5	.	0	.	Hemagglutinin inhibition	A/Indonesia/05/2005 Antigen	1.6094379124341	11.3542217189838	85324.91	Female	15	53	Non-Hispanic or Non-Latino	Yes	01	5
47FUR104	Primed15	Primed (A)	1	1 (Day 0)	80059	Previously Vaccinated	PriorDoseLow	15	Hemagglutinin inhibition - A/Indonesia/05/2005 Antigen	PREVAC	24MAY2011	5	.	0	.	Hemagglutinin inhibition	A/Indonesia/05/2005 Antigen	1.6094379124341	11.1984704408558	73018.67	Female	15	53	Non-Hispanic or Non-Latino	Yes	01	5
47FUR104	Primed15	Primed (A)	2	2 (Day 3)	80059	Previously Vaccinated	PriorDoseLow	15	Hemagglutinin inhibition - A/Indonesia/05/2005 Antigen	DAY3	27MAY2011	5	1	0	0	Hemagglutinin inhibition	A/Indonesia/05/2005 Antigen	1.6094379124341	11.5034793909582	99059.84	Female	15	53	Non-Hispanic or Non-Latino	Yes	02	5
47FUR104	Primed15	Primed (A)	2	2 (Day 3)	80059	Previously Vaccinated	PriorDoseLow	15	Hemagglutinin inhibition - A/Indonesia/05/2005 Antigen	DAY3	27MAY2011	5	1	0	0	Hemagglutinin inhibition	A/Indonesia/05/2005 Antigen	1.6094379124341	11.0687606399666	64135.97	Female	15	53	Non-Hispanic or Non-Latino	Yes	02	5
47FUR104	Primed15	Primed (A)	3	3 (Day 7)	80059	Previously Vaccinated	PriorDoseLow	15	Hemagglutinin inhibition - A/Indonesia/05/2005 Antigen	DAY7	01JUN2011	56.5685425	11.3137085	1	1	Hemagglutinin inhibition	A/Indonesia/05/2005 Antigen	4.03545304448364	13.2734523521351	581550.07	Female	15	53	Non-Hispanic or Non-Latino	Yes	03	5
47FUR104	Primed15	Primed (A)	3	3 (Day 7)	80059	Previously Vaccinated	PriorDoseLow	15	Hemagglutinin inhibition - A/Indonesia/05/2005 Antigen	DAY7	01JUN2011	56.5685425	11.3137085	1	1	Hemagglutinin inhibition	A/Indonesia/05/2005 Antigen	4.03545304448364	13.0382038572751	459642.3	Female	15	53	Non-Hispanic or Non-Latino	Yes	03	5
47FUR104	Primed15	Primed (A)	4	4 (Day 14)	80059	Previously Vaccinated	PriorDoseLow	15	Hemagglutinin inhibition - A/Indonesia/05/2005 Antigen	DAY14	06JUN2011	80	16	1	1	Hemagglutinin inhibition	A/Indonesia/05/2005 Antigen	4.38202663467388	13.4088630260685	665878.85	Female	15	53	Non-Hispanic or Non-Latino	Yes	04	5
47FUR104	Primed15	Primed (A)	4	4 (Day 14)	80059	Previously Vaccinated	PriorDoseLow	15	Hemagglutinin inhibition - A/Indonesia/05/2005 Antigen	DAY14	06JUN2011	80	16	1	1	Hemagglutinin inhibition	A/Indonesia/05/2005 Antigen	4.38202663467388	13.2972879773759	595578.2	Female	15	53	Non-Hispanic or Non-Latino	Yes	04	5
47FUR104	Primed15	Primed (A)	5	5 (Day 28)	80059	Previously Vaccinated	PriorDoseLow	15	Hemagglutinin inhibition - A/Indonesia/05/2005 Antigen	DAY28	20JUN2011	56.5685425	11.3137085	1	1	Hemagglutinin inhibition	A/Indonesia/05/2005 Antigen	4.03545304448364	13.2202471880324	551417.32	Female	15	53	Non-Hispanic or Non-Latino	Yes	05	5
47FUR104	Primed15	Primed (A)	5	5 (Day 28)	80059	Previously Vaccinated	PriorDoseLow	15	Hemagglutinin inhibition - A/Indonesia/05/2005 Antigen	DAY28	20JUN2011	56.5685425	11.3137085	1	1	Hemagglutinin inhibition	A/Indonesia/05/2005 Antigen	4.03545304448364	12.897976328267	399502.91	Female	15	53	Non-Hispanic or Non-Latino	Yes	05	5
47FUR104	Primed15	Primed (A)	9	9 (Day 56)	80059	Previously Vaccinated	PriorDoseLow	15	Hemagglutinin inhibition - A/Indonesia/05/2005 Antigen	DAY56	18JUL2011	40	8	1	1	Hemagglutinin inhibition	A/Indonesia/05/2005 Antigen	3.68887945411393	13.2689030986549	578910.46	Female	15	53	Non-Hispanic or Non-Latino	Yes	09	5
47FUR104	Primed15	Primed (A)	9	9 (Day 56)	80059	Previously Vaccinated	PriorDoseLow	15	Hemagglutinin inhibition - A/Indonesia/05/2005 Antigen	DAY56	18JUL2011	40	8	1	1	Hemagglutinin inhibition	A/Indonesia/05/2005 Antigen	3.68887945411393	13.245912954555	565753.05	Female	15	53	Non-Hispanic or Non-Latino	Yes	09	5
47FUR104	Primed15	Primed (A)	10	10 (Day 180 or 208)	80059	Previously Vaccinated	PriorDoseLow	15	Hemagglutinin inhibition - A/Indonesia/05/2005 Antigen	DAY180	14NOV2011	20	4	0	0	Hemagglutinin inhibition	A/Indonesia/05/2005 Antigen	2.99573227355399	13.035170034769	458249.94	Female	15	53	Non-Hispanic or Non-Latino	Yes	10	5
47FUR104	Primed15	Primed (A)	10	10 (Day 180 or 208)	80059	Previously Vaccinated	PriorDoseLow	15	Hemagglutinin inhibition - A/Indonesia/05/2005 Antigen	DAY180	14NOV2011	20	4	0	0	Hemagglutinin inhibition	A/Indonesia/05/2005 Antigen	2.99573227355399	12.8433508159059	378265.2	Female	15	53	Non-Hispanic or Non-Latino	Yes	10	5
47FUR105	Primed90	Primed (A)	1	1 (Day 0)	80059	Previously Vaccinated	PriorDoseHigh	90	Hemagglutinin inhibition - A/Indonesia/05/2005 Antigen	PREVAC	24MAY2011	5	.	0	.	Hemagglutinin inhibition	A/Indonesia/05/2005 Antigen	1.6094379124341	11.8718107143831	143173.25	Female	90	31	Non-Hispanic or Non-Latino	Yes	01	5
47FUR105	Primed90	Primed (A)	1	1 (Day 0)	80059	Previously Vaccinated	PriorDoseHigh	90	Hemagglutinin inhibition - A/Indonesia/05/2005 Antigen	PREVAC	24MAY2011	5	.	0	.	Hemagglutinin inhibition	A/Indonesia/05/2005 Antigen	1.6094379124341	11.6345309634758	112930.85	Female	90	31	Non-Hispanic or Non-Latino	Yes	01	5
47FUR105	Primed90	Primed (A)	2	2 (Day 3)	80059	Previously Vaccinated	PriorDoseHigh	90	Hemagglutinin inhibition - A/Indonesia/05/2005 Antigen	DAY3	27MAY2011	5	1	0	0	Hemagglutinin inhibition	A/Indonesia/05/2005 Antigen	1.6094379124341	11.8137802204223	135101.31	Female	90	31	Non-Hispanic or Non-Latino	Yes	02	5
47FUR105	Primed90	Primed (A)	2	2 (Day 3)	80059	Previously Vaccinated	PriorDoseHigh	90	Hemagglutinin inhibition - A/Indonesia/05/2005 Antigen	DAY3	27MAY2011	5	1	0	0	Hemagglutinin inhibition	A/Indonesia/05/2005 Antigen	1.6094379124341	11.796060515368	132728.44	Female	90	31	Non-Hispanic or Non-Latino	Yes	02	5
47FUR105	Primed90	Primed (A)	3	3 (Day 7)	80059	Previously Vaccinated	PriorDoseHigh	90	Hemagglutinin inhibition - A/Indonesia/05/2005 Antigen	DAY7	31MAY2011	5	1	0	0	Hemagglutinin inhibition	A/Indonesia/05/2005 Antigen	1.6094379124341	13.2106157823334	546131.89	Female	90	31	Non-Hispanic or Non-Latino	Yes	03	5
47FUR105	Primed90	Primed (A)	3	3 (Day 7)	80059	Previously Vaccinated	PriorDoseHigh	90	Hemagglutinin inhibition - A/Indonesia/05/2005 Antigen	DAY7	31MAY2011	5	1	0	0	Hemagglutinin inhibition	A/Indonesia/05/2005 Antigen	1.6094379124341	12.9360046180641	414987.89	Female	90	31	Non-Hispanic or Non-Latino	Yes	03	5
47FUR105	Primed90	Primed (A)	4	4 (Day 14)	80059	Previously Vaccinated	PriorDoseHigh	90	Hemagglutinin inhibition - A/Indonesia/05/2005 Antigen	DAY14	06JUN2011	80	16	1	1	Hemagglutinin inhibition	A/Indonesia/05/2005 Antigen	4.38202663467388	13.7290663183036	917186.69	Female	90	31	Non-Hispanic or Non-Latino	Yes	04	5
47FUR105	Primed90	Primed (A)	4	4 (Day 14)	80059	Previously Vaccinated	PriorDoseHigh	90	Hemagglutinin inhibition - A/Indonesia/05/2005 Antigen	DAY14	06JUN2011	80	16	1	1	Hemagglutinin inhibition	A/Indonesia/05/2005 Antigen	4.38202663467388	13.5078862612731	735191.48	Female	90	31	Non-Hispanic or Non-Latino	Yes	04	5
47FUR105	Primed90	Primed (A)	5	5 (Day 28)	80059	Previously Vaccinated	PriorDoseHigh	90	Hemagglutinin inhibition - A/Indonesia/05/2005 Antigen	DAY28	21JUN2011	80	16	1	1	Hemagglutinin inhibition	A/Indonesia/05/2005 Antigen	4.38202663467388	13.3561757024199	631703.68	Female	90	31	Non-Hispanic or Non-Latino	Yes	05	5
47FUR105	Primed90	Primed (A)	5	5 (Day 28)	80059	Previously Vaccinated	PriorDoseHigh	90	Hemagglutinin inhibition - A/Indonesia/05/2005 Antigen	DAY28	21JUN2011	80	16	1	1	Hemagglutinin inhibition	A/Indonesia/05/2005 Antigen	4.38202663467388	13.0531641560572	466570.38	Female	90	31	Non-Hispanic or Non-Latino	Yes	05	5
47FUR105	Primed90	Primed (A)	9	9 (Day 56)	80059	Previously Vaccinated	PriorDoseHigh	90	Hemagglutinin inhibition - A/Indonesia/05/2005 Antigen	DAY56	19JUL2011	80	16	1	1	Hemagglutinin inhibition	A/Indonesia/05/2005 Antigen	4.38202663467388	13.4198837744368	673257.92	Female	90	31	Non-Hispanic or Non-Latino	Yes	09	5
47FUR105	Primed90	Primed (A)	9	9 (Day 56)	80059	Previously Vaccinated	PriorDoseHigh	90	Hemagglutinin inhibition - A/Indonesia/05/2005 Antigen	DAY56	19JUL2011	80	16	1	1	Hemagglutinin inhibition	A/Indonesia/05/2005 Antigen	4.38202663467388	13.2080351475212	544724.34	Female	90	31	Non-Hispanic or Non-Latino	Yes	09	5
47FUR105	Primed90	Primed (A)	10	10 (Day 180 or 208)	80059	Previously Vaccinated	PriorDoseHigh	90	Hemagglutinin inhibition - A/Indonesia/05/2005 Antigen	DAY180	16NOV2011	40	8	1	1	Hemagglutinin inhibition	A/Indonesia/05/2005 Antigen	3.68887945411393	13.197663911031	539104.07	Female	90	31	Non-Hispanic or Non-Latino	Yes	10	5
47FUR105	Primed90	Primed (A)	10	10 (Day 180 or 208)	80059	Previously Vaccinated	PriorDoseHigh	90	Hemagglutinin inhibition - A/Indonesia/05/2005 Antigen	DAY180	16NOV2011	40	8	1	1	Hemagglutinin inhibition	A/Indonesia/05/2005 Antigen	3.68887945411393	13.0260521266956	454090.65	Female	90	31	Non-Hispanic or Non-Latino	Yes	10	5
47FUR108	Primed15	Primed (A)	1	1 (Day 0)	80059	Previously Vaccinated	PriorDoseHigh	15	Hemagglutinin inhibition - A/Indonesia/05/2005 Antigen	PREVAC	26MAY2011	5	.	0	.	Hemagglutinin inhibition	A/Indonesia/05/2005 Antigen	1.6094379124341	11.2172915939352	74405.98	Female	15	51	Non-Hispanic or Non-Latino	Yes	01	5
47FUR108	Primed15	Primed (A)	1	1 (Day 0)	80059	Previously Vaccinated	PriorDoseHigh	15	Hemagglutinin inhibition - A/Indonesia/05/2005 Antigen	PREVAC	26MAY2011	5	.	0	.	Hemagglutinin inhibition	A/Indonesia/05/2005 Antigen	1.6094379124341	10.8741329380521	52792.95	Female	15	51	Non-Hispanic or Non-Latino	Yes	01	5
47FUR108	Primed15	Primed (A)	2	2 (Day 3)	80059	Previously Vaccinated	PriorDoseHigh	15	Hemagglutinin inhibition - A/Indonesia/05/2005 Antigen	DAY3	31MAY2011	5	1	0	0	Hemagglutinin inhibition	A/Indonesia/05/2005 Antigen	1.6094379124341	11.226666779023	75106.83	Female	15	51	Non-Hispanic or Non-Latino	Yes	02	5
47FUR108	Primed15	Primed (A)	2	2 (Day 3)	80059	Previously Vaccinated	PriorDoseHigh	15	Hemagglutinin inhibition - A/Indonesia/05/2005 Antigen	DAY3	31MAY2011	5	1	0	0	Hemagglutinin inhibition	A/Indonesia/05/2005 Antigen	1.6094379124341	11.1552074057472	69927.02	Female	15	51	Non-Hispanic or Non-Latino	Yes	02	5
47FUR108	Primed15	Primed (A)	3	3 (Day 7)	80059	Previously Vaccinated	PriorDoseHigh	15	Hemagglutinin inhibition - A/Indonesia/05/2005 Antigen	DAY7	02JUN2011	5	1	0	0	Hemagglutinin inhibition	A/Indonesia/05/2005 Antigen	1.6094379124341	11.8023368662705	133564.11	Female	15	51	Non-Hispanic or Non-Latino	Yes	03	5
47FUR108	Primed15	Primed (A)	3	3 (Day 7)	80059	Previously Vaccinated	PriorDoseHigh	15	Hemagglutinin inhibition - A/Indonesia/05/2005 Antigen	DAY7	02JUN2011	5	1	0	0	Hemagglutinin inhibition	A/Indonesia/05/2005 Antigen	1.6094379124341	11.462373369511	95070.44	Female	15	51	Non-Hispanic or Non-Latino	Yes	03	5
47FUR108	Primed15	Primed (A)	4	4 (Day 14)	80059	Previously Vaccinated	PriorDoseHigh	15	Hemagglutinin inhibition - A/Indonesia/05/2005 Antigen	DAY14	06JUN2011	5	1	0	0	Hemagglutinin inhibition	A/Indonesia/05/2005 Antigen	1.6094379124341	12.0665746883078	173958.96	Female	15	51	Non-Hispanic or Non-Latino	Yes	04	5
47FUR108	Primed15	Primed (A)	4	4 (Day 14)	80059	Previously Vaccinated	PriorDoseHigh	15	Hemagglutinin inhibition - A/Indonesia/05/2005 Antigen	DAY14	06JUN2011	5	1	0	0	Hemagglutinin inhibition	A/Indonesia/05/2005 Antigen	1.6094379124341	11.7531639025249	127155.23	Female	15	51	Non-Hispanic or Non-Latino	Yes	04	5
47FUR108	Primed15	Primed (A)	9	9 (Day 56)	80059	Previously Vaccinated	PriorDoseHigh	15	Hemagglutinin inhibition - A/Indonesia/05/2005 Antigen	DAY56	25JUL2011	5	1	0	0	Hemagglutinin inhibition	A/Indonesia/05/2005 Antigen	1.6094379124341	11.685907544302	118884.48	Female	15	51	Non-Hispanic or Non-Latino	Yes	09	5
47FUR108	Primed15	Primed (A)	9	9 (Day 56)	80059	Previously Vaccinated	PriorDoseHigh	15	Hemagglutinin inhibition - A/Indonesia/05/2005 Antigen	DAY56	25JUL2011	5	1	0	0	Hemagglutinin inhibition	A/Indonesia/05/2005 Antigen	1.6094379124341	11.6121682655113	110433.44	Female	15	51	Non-Hispanic or Non-Latino	Yes	09	5
47FUR108	Primed15	Primed (A)	10	10 (Day 180 or 208)	80059	Previously Vaccinated	PriorDoseHigh	15	Hemagglutinin inhibition - A/Indonesia/05/2005 Antigen	DAY180	16NOV2011	5	1	0	0	Hemagglutinin inhibition	A/Indonesia/05/2005 Antigen	1.6094379124341	12.5491466141145	281854.6	Female	15	51	Non-Hispanic or Non-Latino	Yes	10	5
47FUR108	Primed15	Primed (A)	10	10 (Day 180 or 208)	80059	Previously Vaccinated	PriorDoseHigh	15	Hemagglutinin inhibition - A/Indonesia/05/2005 Antigen	DAY180	16NOV2011	5	1	0	0	Hemagglutinin inhibition	A/Indonesia/05/2005 Antigen	1.6094379124341	12.3742866149591	236637.95	Female	15	51	Non-Hispanic or Non-Latino	Yes	10	5
47FUR109	Primed90	Primed (A)	1	1 (Day 0)	80059	Previously Vaccinated	PriorDoseLow	90	Hemagglutinin inhibition - A/Indonesia/05/2005 Antigen	PREVAC	26MAY2011	5	.	0	.	Hemagglutinin inhibition	A/Indonesia/05/2005 Antigen	1.6094379124341	11.1496448946984	69539.13	Female	90	46	Non-Hispanic or Non-Latino	Yes	01	3
47FUR109	Primed90	Primed (A)	1	1 (Day 0)	80059	Previously Vaccinated	PriorDoseLow	90	Hemagglutinin inhibition - A/Indonesia/05/2005 Antigen	PREVAC	26MAY2011	5	.	0	.	Hemagglutinin inhibition	A/Indonesia/05/2005 Antigen	1.6094379124341	10.894448741197	53876.45	Female	90	46	Non-Hispanic or Non-Latino	Yes	01	3
47FUR109	Primed90	Primed (A)	2	2 (Day 3)	80059	Previously Vaccinated	PriorDoseLow	90	Hemagglutinin inhibition - A/Indonesia/05/2005 Antigen	DAY3	31MAY2011	5	1	0	0	Hemagglutinin inhibition	A/Indonesia/05/2005 Antigen	1.6094379124341	12.1574269484248	190503.71	Female	90	46	Non-Hispanic or Non-Latino	Yes	02	3
47FUR109	Primed90	Primed (A)	2	2 (Day 3)	80059	Previously Vaccinated	PriorDoseLow	90	Hemagglutinin inhibition - A/Indonesia/05/2005 Antigen	DAY3	31MAY2011	5	1	0	0	Hemagglutinin inhibition	A/Indonesia/05/2005 Antigen	1.6094379124341	11.8661543781594	142365.7	Female	90	46	Non-Hispanic or Non-Latino	Yes	02	3
47FUR109	Primed90	Primed (A)	3	3 (Day 7)	80059	Previously Vaccinated	PriorDoseLow	90	Hemagglutinin inhibition - A/Indonesia/05/2005 Antigen	DAY7	02JUN2011	113.137085	22.627417	1	1	Hemagglutinin inhibition	A/Indonesia/05/2005 Antigen	4.72860022504359	13.780894154291	965975.89	Female	90	46	Non-Hispanic or Non-Latino	Yes	03	3
47FUR109	Primed90	Primed (A)	3	3 (Day 7)	80059	Previously Vaccinated	PriorDoseLow	90	Hemagglutinin inhibition - A/Indonesia/05/2005 Antigen	DAY7	02JUN2011	113.137085	22.627417	1	1	Hemagglutinin inhibition	A/Indonesia/05/2005 Antigen	4.72860022504359	13.7005679581976	891417.31	Female	90	46	Non-Hispanic or Non-Latino	Yes	03	3
47FUR109	Primed90	Primed (A)	4	4 (Day 14)	80059	Previously Vaccinated	PriorDoseLow	90	Hemagglutinin inhibition - A/Indonesia/05/2005 Antigen	DAY14	09JUN2011	226.27417	45.254834	1	1	Hemagglutinin inhibition	A/Indonesia/05/2005 Antigen	5.42174740560353	13.8155105579642	1000000	Female	90	46	Non-Hispanic or Non-Latino	Yes	04	3
47FUR109	Primed90	Primed (A)	4	4 (Day 14)	80059	Previously Vaccinated	PriorDoseLow	90	Hemagglutinin inhibition - A/Indonesia/05/2005 Antigen	DAY14	09JUN2011	226.27417	45.254834	1	1	Hemagglutinin inhibition	A/Indonesia/05/2005 Antigen	5.42174740560353	13.721500668416	910273.76	Female	90	46	Non-Hispanic or Non-Latino	Yes	04	3
47FUR109	Primed90	Primed (A)	5	5 (Day 28)	80059	Previously Vaccinated	PriorDoseLow	90	Hemagglutinin inhibition - A/Indonesia/05/2005 Antigen	DAY28	23JUN2011	80	16	1	1	Hemagglutinin inhibition	A/Indonesia/05/2005 Antigen	4.38202663467388	13.2667328799568	577655.46	Female	90	46	Non-Hispanic or Non-Latino	Yes	05	3
47FUR109	Primed90	Primed (A)	5	5 (Day 28)	80059	Previously Vaccinated	PriorDoseLow	90	Hemagglutinin inhibition - A/Indonesia/05/2005 Antigen	DAY28	23JUN2011	80	16	1	1	Hemagglutinin inhibition	A/Indonesia/05/2005 Antigen	4.38202663467388	12.9884516381714	437333.63	Female	90	46	Non-Hispanic or Non-Latino	Yes	05	3
47FUR109	Primed90	Primed (A)	9	9 (Day 56)	80059	Previously Vaccinated	PriorDoseLow	90	Hemagglutinin inhibition - A/Indonesia/05/2005 Antigen	DAY56	25JUL2011	56.5685425	11.3137085	1	1	Hemagglutinin inhibition	A/Indonesia/05/2005 Antigen	4.03545304448364	12.8813674158837	392922.4	Female	90	46	Non-Hispanic or Non-Latino	Yes	09	3
47FUR109	Primed90	Primed (A)	9	9 (Day 56)	80059	Previously Vaccinated	PriorDoseLow	90	Hemagglutinin inhibition - A/Indonesia/05/2005 Antigen	DAY56	25JUL2011	56.5685425	11.3137085	1	1	Hemagglutinin inhibition	A/Indonesia/05/2005 Antigen	4.03545304448364	12.8760463328035	390837.18	Female	90	46	Non-Hispanic or Non-Latino	Yes	09	3
47FUR109	Primed90	Primed (A)	10	10 (Day 180 or 208)	80059	Previously Vaccinated	PriorDoseLow	90	Hemagglutinin inhibition - A/Indonesia/05/2005 Antigen	DAY180	17NOV2011	7.071067812	1.414213562	0	0	Hemagglutinin inhibition	A/Indonesia/05/2005 Antigen	1.95601150273309	12.1980213204236	198396.2	Female	90	46	Non-Hispanic or Non-Latino	Yes	10	3
47FUR109	Primed90	Primed (A)	10	10 (Day 180 or 208)	80059	Previously Vaccinated	PriorDoseLow	90	Hemagglutinin inhibition - A/Indonesia/05/2005 Antigen	DAY180	17NOV2011	7.071067812	1.414213562	0	0	Hemagglutinin inhibition	A/Indonesia/05/2005 Antigen	1.95601150273309	12.0745358908634	175349.41	Female	90	46	Non-Hispanic or Non-Latino	Yes	10	3
47FUR111	Primed15	Primed (A)	1	1 (Day 0)	80059	Previously Vaccinated	PriorDoseLow	15	Hemagglutinin inhibition - A/Indonesia/05/2005 Antigen	PREVAC	08JUN2011	5	.	0	.	Hemagglutinin inhibition	A/Indonesia/05/2005 Antigen	1.6094379124341	10.9685201342827	58018.67	Female	15	43	Non-Hispanic or Non-Latino	Yes	01	2
47FUR111	Primed15	Primed (A)	1	1 (Day 0)	80059	Previously Vaccinated	PriorDoseLow	15	Hemagglutinin inhibition - A/Indonesia/05/2005 Antigen	PREVAC	08JUN2011	5	.	0	.	Hemagglutinin inhibition	A/Indonesia/05/2005 Antigen	1.6094379124341	10.435044196038	34031.58	Female	15	43	Non-Hispanic or Non-Latino	Yes	01	2
47FUR111	Primed15	Primed (A)	2	2 (Day 3)	80059	Previously Vaccinated	PriorDoseLow	15	Hemagglutinin inhibition - A/Indonesia/05/2005 Antigen	DAY3	13JUN2011	5	1	0	0	Hemagglutinin inhibition	A/Indonesia/05/2005 Antigen	1.6094379124341	11.3234691965444	82740.89	Female	15	43	Non-Hispanic or Non-Latino	Yes	02	2
47FUR111	Primed15	Primed (A)	2	2 (Day 3)	80059	Previously Vaccinated	PriorDoseLow	15	Hemagglutinin inhibition - A/Indonesia/05/2005 Antigen	DAY3	13JUN2011	5	1	0	0	Hemagglutinin inhibition	A/Indonesia/05/2005 Antigen	1.6094379124341	10.9207554672862	55312.57	Female	15	43	Non-Hispanic or Non-Latino	Yes	02	2
47FUR111	Primed15	Primed (A)	3	3 (Day 7)	80059	Previously Vaccinated	PriorDoseLow	15	Hemagglutinin inhibition - A/Indonesia/05/2005 Antigen	DAY7	16JUN2011	5	1	0	0	Hemagglutinin inhibition	A/Indonesia/05/2005 Antigen	1.6094379124341	11.7322772767171	124526.93	Female	15	43	Non-Hispanic or Non-Latino	Yes	03	2
47FUR111	Primed15	Primed (A)	3	3 (Day 7)	80059	Previously Vaccinated	PriorDoseLow	15	Hemagglutinin inhibition - A/Indonesia/05/2005 Antigen	DAY7	16JUN2011	5	1	0	0	Hemagglutinin inhibition	A/Indonesia/05/2005 Antigen	1.6094379124341	11.5203631367874	100746.54	Female	15	43	Non-Hispanic or Non-Latino	Yes	03	2
47FUR111	Primed15	Primed (A)	4	4 (Day 14)	80059	Previously Vaccinated	PriorDoseLow	15	Hemagglutinin inhibition - A/Indonesia/05/2005 Antigen	DAY14	24JUN2011	5	1	0	0	Hemagglutinin inhibition	A/Indonesia/05/2005 Antigen	1.6094379124341	11.9074938185075	148374.36	Female	15	43	Non-Hispanic or Non-Latino	Yes	04	2
47FUR111	Primed15	Primed (A)	4	4 (Day 14)	80059	Previously Vaccinated	PriorDoseLow	15	Hemagglutinin inhibition - A/Indonesia/05/2005 Antigen	DAY14	24JUN2011	5	1	0	0	Hemagglutinin inhibition	A/Indonesia/05/2005 Antigen	1.6094379124341	11.5030991444274	99022.18	Female	15	43	Non-Hispanic or Non-Latino	Yes	04	2
47FUR111	Primed15	Primed (A)	5	5 (Day 28)	80059	Previously Vaccinated	PriorDoseLow	15	Hemagglutinin inhibition - A/Indonesia/05/2005 Antigen	DAY28	08JUL2011	5	1	0	0	Hemagglutinin inhibition	A/Indonesia/05/2005 Antigen	1.6094379124341	11.858289197678	141250.36	Female	15	43	Non-Hispanic or Non-Latino	Yes	05	2
47FUR111	Primed15	Primed (A)	5	5 (Day 28)	80059	Previously Vaccinated	PriorDoseLow	15	Hemagglutinin inhibition - A/Indonesia/05/2005 Antigen	DAY28	08JUL2011	5	1	0	0	Hemagglutinin inhibition	A/Indonesia/05/2005 Antigen	1.6094379124341	11.3888884010844	88334.71	Female	15	43	Non-Hispanic or Non-Latino	Yes	05	2
47FUR111	Primed15	Primed (A)	9	9 (Day 56)	80059	Previously Vaccinated	PriorDoseLow	15	Hemagglutinin inhibition - A/Indonesia/05/2005 Antigen	DAY56	05AUG2011	5	1	0	0	Hemagglutinin inhibition	A/Indonesia/05/2005 Antigen	1.6094379124341	11.9878563727171	160790.31	Female	15	43	Non-Hispanic or Non-Latino	Yes	09	2
47FUR111	Primed15	Primed (A)	9	9 (Day 56)	80059	Previously Vaccinated	PriorDoseLow	15	Hemagglutinin inhibition - A/Indonesia/05/2005 Antigen	DAY56	05AUG2011	5	1	0	0	Hemagglutinin inhibition	A/Indonesia/05/2005 Antigen	1.6094379124341	11.5538679642294	104179.22	Female	15	43	Non-Hispanic or Non-Latino	Yes	09	2
47FUR111	Primed15	Primed (A)	10	10 (Day 180 or 208)	80059	Previously Vaccinated	PriorDoseLow	15	Hemagglutinin inhibition - A/Indonesia/05/2005 Antigen	DAY180	01DEC2011	5	1	0	0	Hemagglutinin inhibition	A/Indonesia/05/2005 Antigen	1.6094379124341	11.4429716676561	93243.69	Female	15	43	Non-Hispanic or Non-Latino	Yes	10	2
47FUR111	Primed15	Primed (A)	10	10 (Day 180 or 208)	80059	Previously Vaccinated	PriorDoseLow	15	Hemagglutinin inhibition - A/Indonesia/05/2005 Antigen	DAY180	01DEC2011	5	1	0	0	Hemagglutinin inhibition	A/Indonesia/05/2005 Antigen	1.6094379124341	10.925089018829	55552.79	Female	15	43	Non-Hispanic or Non-Latino	Yes	10	2
47FUR112	Unprimed15	Unprimed (B)	1	1 (Day 0)	80059	Na&#195;&#175;ve	Na&#195;&#175;ve	15	Hemagglutinin inhibition - A/Indonesia/05/2005 Antigen	PREVAC	11JUL2011	5	.	0	.	Hemagglutinin inhibition	A/Indonesia/05/2005 Antigen	1.6094379124341	11.3903738024642	88466.02	Female	15	57	Non-Hispanic or Non-Latino	Yes	01	5
47FUR112	Unprimed15	Unprimed (B)	1	1 (Day 0)	80059	Na&#195;&#175;ve	Na&#195;&#175;ve	15	Hemagglutinin inhibition - A/Indonesia/05/2005 Antigen	PREVAC	11JUL2011	5	.	0	.	Hemagglutinin inhibition	A/Indonesia/05/2005 Antigen	1.6094379124341	11.2818591109777	79368.68	Female	15	57	Non-Hispanic or Non-Latino	Yes	01	5
47FUR112	Unprimed15	Unprimed (B)	2	2 (Day 3)	80059	Na&#195;&#175;ve	Na&#195;&#175;ve	15	Hemagglutinin inhibition - A/Indonesia/05/2005 Antigen	D3POSTVAC1	13JUL2011	5	1	0	0	Hemagglutinin inhibition	A/Indonesia/05/2005 Antigen	1.6094379124341	11.434632733528	92469.37	Female	15	57	Non-Hispanic or Non-Latino	Yes	02	5
47FUR112	Unprimed15	Unprimed (B)	2	2 (Day 3)	80059	Na&#195;&#175;ve	Na&#195;&#175;ve	15	Hemagglutinin inhibition - A/Indonesia/05/2005 Antigen	D3POSTVAC1	13JUL2011	5	1	0	0	Hemagglutinin inhibition	A/Indonesia/05/2005 Antigen	1.6094379124341	11.2511490576808	76968.31	Female	15	57	Non-Hispanic or Non-Latino	Yes	02	5
47FUR112	Unprimed15	Unprimed (B)	3	3 (Day 7)	80059	Na&#195;&#175;ve	Na&#195;&#175;ve	15	Hemagglutinin inhibition - A/Indonesia/05/2005 Antigen	D7POSTVAC1	18JUL2011	5	1	0	0	Hemagglutinin inhibition	A/Indonesia/05/2005 Antigen	1.6094379124341	12.0462254379204	170454.8	Female	15	57	Non-Hispanic or Non-Latino	Yes	03	5
47FUR112	Unprimed15	Unprimed (B)	3	3 (Day 7)	80059	Na&#195;&#175;ve	Na&#195;&#175;ve	15	Hemagglutinin inhibition - A/Indonesia/05/2005 Antigen	D7POSTVAC1	18JUL2011	5	1	0	0	Hemagglutinin inhibition	A/Indonesia/05/2005 Antigen	1.6094379124341	11.6705878002829	117077.08	Female	15	57	Non-Hispanic or Non-Latino	Yes	03	5
47FUR112	Unprimed15	Unprimed (B)	4	4 (Day 14)	80059	Na&#195;&#175;ve	Na&#195;&#175;ve	15	Hemagglutinin inhibition - A/Indonesia/05/2005 Antigen	D14POSTVAC1	25JUL2011	40	8	1	1	Hemagglutinin inhibition	A/Indonesia/05/2005 Antigen	3.68887945411393	12.2262042383191	204067.12	Female	15	57	Non-Hispanic or Non-Latino	Yes	04	5
47FUR112	Unprimed15	Unprimed (B)	4	4 (Day 14)	80059	Na&#195;&#175;ve	Na&#195;&#175;ve	15	Hemagglutinin inhibition - A/Indonesia/05/2005 Antigen	D14POSTVAC1	25JUL2011	40	8	1	1	Hemagglutinin inhibition	A/Indonesia/05/2005 Antigen	3.68887945411393	11.9290907877149	151613.65	Female	15	57	Non-Hispanic or Non-Latino	Yes	04	5
47FUR112	Unprimed15	Unprimed (B)	5	5 (Day 28)	80059	Na&#195;&#175;ve	Na&#195;&#175;ve	15	Hemagglutinin inhibition - A/Indonesia/05/2005 Antigen	D28POSTVAC1	08AUG2011	5	1	0	0	Hemagglutinin inhibition	A/Indonesia/05/2005 Antigen	1.6094379124341	11.720872938528	123114.85	Female	15	57	Non-Hispanic or Non-Latino	Yes	05	5
47FUR112	Unprimed15	Unprimed (B)	5	5 (Day 28)	80059	Na&#195;&#175;ve	Na&#195;&#175;ve	15	Hemagglutinin inhibition - A/Indonesia/05/2005 Antigen	D28POSTVAC1	08AUG2011	5	1	0	0	Hemagglutinin inhibition	A/Indonesia/05/2005 Antigen	1.6094379124341	11.6705878002829	117077.08	Female	15	57	Non-Hispanic or Non-Latino	Yes	05	5
47FUR112	Unprimed15	Unprimed (B)	6	6 (Day 31)	80059	Na&#195;&#175;ve	Na&#195;&#175;ve	15	Hemagglutinin inhibition - A/Indonesia/05/2005 Antigen	D3POSTVAC2	10AUG2011	5	1	0	0	Hemagglutinin inhibition	A/Indonesia/05/2005 Antigen	1.6094379124341	11.9199520866146	150234.41	Female	15	57	Non-Hispanic or Non-Latino	Yes	06	5
47FUR112	Unprimed15	Unprimed (B)	6	6 (Day 31)	80059	Na&#195;&#175;ve	Na&#195;&#175;ve	15	Hemagglutinin inhibition - A/Indonesia/05/2005 Antigen	D3POSTVAC2	10AUG2011	5	1	0	0	Hemagglutinin inhibition	A/Indonesia/05/2005 Antigen	1.6094379124341	11.7170406395789	122643.94	Female	15	57	Non-Hispanic or Non-Latino	Yes	06	5
47FUR112	Unprimed15	Unprimed (B)	7	7 (Day 35)	80059	Na&#195;&#175;ve	Na&#195;&#175;ve	15	Hemagglutinin inhibition - A/Indonesia/05/2005 Antigen	D7POSTVAC2	15AUG2011	5	1	0	0	Hemagglutinin inhibition	A/Indonesia/05/2005 Antigen	1.6094379124341	.	.	Female	15	57	Non-Hispanic or Non-Latino	Yes	07	5
47FUR112	Unprimed15	Unprimed (B)	7	7 (Day 35)	80059	Na&#195;&#175;ve	Na&#195;&#175;ve	15	Hemagglutinin inhibition - A/Indonesia/05/2005 Antigen	D7POSTVAC2	15AUG2011	5	1	0	0	Hemagglutinin inhibition	A/Indonesia/05/2005 Antigen	1.6094379124341	.	.	Female	15	57	Non-Hispanic or Non-Latino	Yes	07	5
47FUR112	Unprimed15	Unprimed (B)	8	8 (Day 42)	80059	Na&#195;&#175;ve	Na&#195;&#175;ve	15	Hemagglutinin inhibition - A/Indonesia/05/2005 Antigen	D14POSTVAC2	22AUG2011	25.198421	5.0396842	0	0	Hemagglutinin inhibition	A/Indonesia/05/2005 Antigen	3.22678133382407	12.1436063225728	187888.94	Female	15	57	Non-Hispanic or Non-Latino	Yes	08	5
47FUR112	Unprimed15	Unprimed (B)	8	8 (Day 42)	80059	Na&#195;&#175;ve	Na&#195;&#175;ve	15	Hemagglutinin inhibition - A/Indonesia/05/2005 Antigen	D14POSTVAC2	22AUG2011	25.198421	5.0396842	0	0	Hemagglutinin inhibition	A/Indonesia/05/2005 Antigen	3.22678133382407	12.0012104055839	162951.91	Female	15	57	Non-Hispanic or Non-Latino	Yes	08	5
47FUR112	Unprimed15	Unprimed (B)	9	9 (Day 56)	80059	Na&#195;&#175;ve	Na&#195;&#175;ve	15	Hemagglutinin inhibition - A/Indonesia/05/2005 Antigen	D28POSTVAC2	06SEP2011	7.071067812	1.414213562	0	0	Hemagglutinin inhibition	A/Indonesia/05/2005 Antigen	1.95601150273309	12.0561974461301	172163.08	Female	15	57	Non-Hispanic or Non-Latino	Yes	09	5
47FUR112	Unprimed15	Unprimed (B)	9	9 (Day 56)	80059	Na&#195;&#175;ve	Na&#195;&#175;ve	15	Hemagglutinin inhibition - A/Indonesia/05/2005 Antigen	D28POSTVAC2	06SEP2011	7.071067812	1.414213562	0	0	Hemagglutinin inhibition	A/Indonesia/05/2005 Antigen	1.95601150273309	11.8001565107247	133273.21	Female	15	57	Non-Hispanic or Non-Latino	Yes	09	5
47FUR112	Unprimed15	Unprimed (B)	10	10 (Day 180 or 208)	80059	Na&#195;&#175;ve	Na&#195;&#175;ve	15	Hemagglutinin inhibition - A/Indonesia/05/2005 Antigen	6MOVAC2	30JAN2012	5	1	0	0	Hemagglutinin inhibition	A/Indonesia/05/2005 Antigen	1.6094379124341	11.7471444960982	126392.13	Female	15	57	Non-Hispanic or Non-Latino	Yes	10	5
47FUR112	Unprimed15	Unprimed (B)	10	10 (Day 180 or 208)	80059	Na&#195;&#175;ve	Na&#195;&#175;ve	15	Hemagglutinin inhibition - A/Indonesia/05/2005 Antigen	6MOVAC2	30JAN2012	5	1	0	0	Hemagglutinin inhibition	A/Indonesia/05/2005 Antigen	1.6094379124341	11.5833941801971	107301.1	Female	15	57	Non-Hispanic or Non-Latino	Yes	10	5
47FUR114	Unprimed15	Unprimed (B)	1	1 (Day 0)	80059	Na&#195;&#175;ve	Na&#195;&#175;ve	15	Hemagglutinin inhibition - A/Indonesia/05/2005 Antigen	PREVAC	14JUL2011	5	.	0	.	Hemagglutinin inhibition	A/Indonesia/05/2005 Antigen	1.6094379124341	11.1308294110084	68242.95	Female	15	51	Non-Hispanic or Non-Latino	Yes	01	2
47FUR114	Unprimed15	Unprimed (B)	1	1 (Day 0)	80059	Na&#195;&#175;ve	Na&#195;&#175;ve	15	Hemagglutinin inhibition - A/Indonesia/05/2005 Antigen	PREVAC	14JUL2011	5	.	0	.	Hemagglutinin inhibition	A/Indonesia/05/2005 Antigen	1.6094379124341	10.3624788935014	31649.54	Female	15	51	Non-Hispanic or Non-Latino	Yes	01	2
47FUR114	Unprimed15	Unprimed (B)	2	2 (Day 3)	80059	Na&#195;&#175;ve	Na&#195;&#175;ve	15	Hemagglutinin inhibition - A/Indonesia/05/2005 Antigen	D3POSTVAC1	18JUL2011	5	1	0	0	Hemagglutinin inhibition	A/Indonesia/05/2005 Antigen	1.6094379124341	11.0641190979083	63838.97	Female	15	51	Non-Hispanic or Non-Latino	Yes	02	2
47FUR114	Unprimed15	Unprimed (B)	2	2 (Day 3)	80059	Na&#195;&#175;ve	Na&#195;&#175;ve	15	Hemagglutinin inhibition - A/Indonesia/05/2005 Antigen	D3POSTVAC1	18JUL2011	5	1	0	0	Hemagglutinin inhibition	A/Indonesia/05/2005 Antigen	1.6094379124341	10.2643711775389	28691.93	Female	15	51	Non-Hispanic or Non-Latino	Yes	02	2
47FUR114	Unprimed15	Unprimed (B)	3	3 (Day 7)	80059	Na&#195;&#175;ve	Na&#195;&#175;ve	15	Hemagglutinin inhibition - A/Indonesia/05/2005 Antigen	D7POSTVAC1	21JUL2011	5	1	0	0	Hemagglutinin inhibition	A/Indonesia/05/2005 Antigen	1.6094379124341	11.3962997343779	88991.82	Female	15	51	Non-Hispanic or Non-Latino	Yes	03	2
47FUR114	Unprimed15	Unprimed (B)	3	3 (Day 7)	80059	Na&#195;&#175;ve	Na&#195;&#175;ve	15	Hemagglutinin inhibition - A/Indonesia/05/2005 Antigen	D7POSTVAC1	21JUL2011	5	1	0	0	Hemagglutinin inhibition	A/Indonesia/05/2005 Antigen	1.6094379124341	11.0966072746514	65947.04	Female	15	51	Non-Hispanic or Non-Latino	Yes	03	2
47FUR114	Unprimed15	Unprimed (B)	4	4 (Day 14)	80059	Na&#195;&#175;ve	Na&#195;&#175;ve	15	Hemagglutinin inhibition - A/Indonesia/05/2005 Antigen	D14POSTVAC1	28JUL2011	5	1	0	0	Hemagglutinin inhibition	A/Indonesia/05/2005 Antigen	1.6094379124341	11.1004541707583	66201.22	Female	15	51	Non-Hispanic or Non-Latino	Yes	04	2
47FUR114	Unprimed15	Unprimed (B)	4	4 (Day 14)	80059	Na&#195;&#175;ve	Na&#195;&#175;ve	15	Hemagglutinin inhibition - A/Indonesia/05/2005 Antigen	D14POSTVAC1	28JUL2011	5	1	0	0	Hemagglutinin inhibition	A/Indonesia/05/2005 Antigen	1.6094379124341	10.7206765858744	45282.53	Female	15	51	Non-Hispanic or Non-Latino	Yes	04	2
47FUR114	Unprimed15	Unprimed (B)	5	5 (Day 28)	80059	Na&#195;&#175;ve	Na&#195;&#175;ve	15	Hemagglutinin inhibition - A/Indonesia/05/2005 Antigen	D28POSTVAC1	09AUG2011	5	1	0	0	Hemagglutinin inhibition	A/Indonesia/05/2005 Antigen	1.6094379124341	11.4822965523647	96983.54	Female	15	51	Non-Hispanic or Non-Latino	Yes	05	2
47FUR114	Unprimed15	Unprimed (B)	5	5 (Day 28)	80059	Na&#195;&#175;ve	Na&#195;&#175;ve	15	Hemagglutinin inhibition - A/Indonesia/05/2005 Antigen	D28POSTVAC1	09AUG2011	5	1	0	0	Hemagglutinin inhibition	A/Indonesia/05/2005 Antigen	1.6094379124341	11.1708536599877	71029.72	Female	15	51	Non-Hispanic or Non-Latino	Yes	05	2
47FUR114	Unprimed15	Unprimed (B)	6	6 (Day 31)	80059	Na&#195;&#175;ve	Na&#195;&#175;ve	15	Hemagglutinin inhibition - A/Indonesia/05/2005 Antigen	D3POSTVAC2	11AUG2011	5	1	0	0	Hemagglutinin inhibition	A/Indonesia/05/2005 Antigen	1.6094379124341	11.2993633646001	80770.2	Female	15	51	Non-Hispanic or Non-Latino	Yes	06	2
47FUR114	Unprimed15	Unprimed (B)	6	6 (Day 31)	80059	Na&#195;&#175;ve	Na&#195;&#175;ve	15	Hemagglutinin inhibition - A/Indonesia/05/2005 Antigen	D3POSTVAC2	11AUG2011	5	1	0	0	Hemagglutinin inhibition	A/Indonesia/05/2005 Antigen	1.6094379124341	10.6518608089507	42271.18	Female	15	51	Non-Hispanic or Non-Latino	Yes	06	2
47FUR114	Unprimed15	Unprimed (B)	7	7 (Day 35)	80059	Na&#195;&#175;ve	Na&#195;&#175;ve	15	Hemagglutinin inhibition - A/Indonesia/05/2005 Antigen	D7POSTVAC2	17AUG2011	5	1	0	0	Hemagglutinin inhibition	A/Indonesia/05/2005 Antigen	1.6094379124341	11.489165929428	97652.05	Female	15	51	Non-Hispanic or Non-Latino	Yes	07	2
47FUR114	Unprimed15	Unprimed (B)	7	7 (Day 35)	80059	Na&#195;&#175;ve	Na&#195;&#175;ve	15	Hemagglutinin inhibition - A/Indonesia/05/2005 Antigen	D7POSTVAC2	17AUG2011	5	1	0	0	Hemagglutinin inhibition	A/Indonesia/05/2005 Antigen	1.6094379124341	10.8852622334899	53383.78	Female	15	51	Non-Hispanic or Non-Latino	Yes	07	2
47FUR114	Unprimed15	Unprimed (B)	8	8 (Day 42)	80059	Na&#195;&#175;ve	Na&#195;&#175;ve	15	Hemagglutinin inhibition - A/Indonesia/05/2005 Antigen	D14POSTVAC2	23AUG2011	5	1	0	0	Hemagglutinin inhibition	A/Indonesia/05/2005 Antigen	1.6094379124341	11.3786702676051	87436.69	Female	15	51	Non-Hispanic or Non-Latino	Yes	08	2
47FUR114	Unprimed15	Unprimed (B)	8	8 (Day 42)	80059	Na&#195;&#175;ve	Na&#195;&#175;ve	15	Hemagglutinin inhibition - A/Indonesia/05/2005 Antigen	D14POSTVAC2	23AUG2011	5	1	0	0	Hemagglutinin inhibition	A/Indonesia/05/2005 Antigen	1.6094379124341	10.9915603284841	59370.95	Female	15	51	Non-Hispanic or Non-Latino	Yes	08	2
47FUR114	Unprimed15	Unprimed (B)	9	9 (Day 56)	80059	Na&#195;&#175;ve	Na&#195;&#175;ve	15	Hemagglutinin inhibition - A/Indonesia/05/2005 Antigen	D28POSTVAC2	06SEP2011	5	1	0	0	Hemagglutinin inhibition	A/Indonesia/05/2005 Antigen	1.6094379124341	11.3376101867851	83919.24	Female	15	51	Non-Hispanic or Non-Latino	Yes	09	2
47FUR114	Unprimed15	Unprimed (B)	9	9 (Day 56)	80059	Na&#195;&#175;ve	Na&#195;&#175;ve	15	Hemagglutinin inhibition - A/Indonesia/05/2005 Antigen	D28POSTVAC2	06SEP2011	5	1	0	0	Hemagglutinin inhibition	A/Indonesia/05/2005 Antigen	1.6094379124341	10.9713447136508	58182.78	Female	15	51	Non-Hispanic or Non-Latino	Yes	09	2
47FUR114	Unprimed15	Unprimed (B)	10	10 (Day 180 or 208)	80059	Na&#195;&#175;ve	Na&#195;&#175;ve	15	Hemagglutinin inhibition - A/Indonesia/05/2005 Antigen	6MOVAC2	07FEB2012	5	1	0	0	Hemagglutinin inhibition	A/Indonesia/05/2005 Antigen	1.6094379124341	11.4082107407442	90058.14	Female	15	51	Non-Hispanic or Non-Latino	Yes	10	2
47FUR114	Unprimed15	Unprimed (B)	10	10 (Day 180 or 208)	80059	Na&#195;&#175;ve	Na&#195;&#175;ve	15	Hemagglutinin inhibition - A/Indonesia/05/2005 Antigen	6MOVAC2	07FEB2012	5	1	0	0	Hemagglutinin inhibition	A/Indonesia/05/2005 Antigen	1.6094379124341	11.0531772289522	63144.26	Female	15	51	Non-Hispanic or Non-Latino	Yes	10	2
